# Supplementary material for: PCy3-assisted Ag(i)-catalyzed click reaction for regioselective synthesis of 1,4-disubstituted 1,2,3-triazoles at room temperature
Source: Royal Society of Chemistry journal article supplement (doi:10.1039/d3ob01738a), 2023-12-01

# **PCy<sub>3</sub> assisted Ag(I) catalyzed click reaction for regioselective synthesis of 1,4-disubstituted 1,2,3-triazoles at room temperature**

Roktopol Hazarika,<sup>a</sup> Sanghamitra Dutta,<sup>a</sup> Samprity Sarmah,<sup>a</sup> Priyanuj Krishnann Hazarika,<sup>a</sup> Kuldeep Singh,<sup>b</sup> Arvind Kumar,<sup>b</sup> Bipul Sarma,<sup>c</sup> Diganta Sarma<sup>a\*</sup>

<sup>a</sup>Department of Chemistry, Dibrugarh University, Dibrugarh-786004, Assam, India

<sup>b</sup>AcSIR, Salt and Marine Chemicals Division, CSIR-Central Salt and Marine Chemicals Research Institute, Bhavnagar-364002, India

<sup>c</sup>Department of Chemical Sciences, Tezpur University -364002, India

## **Supporting Information**

### **Table of Contents**

|          |                                                                                     |
|----------|-------------------------------------------------------------------------------------|
| <b>1</b> | <b>General Information</b>                                                          |
| <b>2</b> | <b>General reaction procedure of the triazole synthesis and complex preparation</b> |
| <b>3</b> | <b>Single crystal data</b>                                                          |
| <b>4</b> | <b>Comparative study</b>                                                            |
| <b>5</b> | <b>Full Characterization data of the compounds</b>                                  |
| <b>6</b> | <b><sup>1</sup>H &amp; <sup>13</sup>C NMR spectra of the compounds</b>              |
| <b>7</b> | <b>CheckCIF file for the single crystals</b>                                        |

### General Information:

All reactions were performed under atmospheric conditions using oven dried glassware. All the glassware, magnetic bead and the spatulas are subjected to acid wash to ensure a copper free environment. All reagents and solvents were purchased from common commercial sources and used without further purification unless otherwise stated. All reported yields are isolated yields. Thin layer chromatography (TLC) was carried out using aluminium sheets pre-coated with silica gel 60F<sub>254</sub> (Merck) and was visualized under 254 nm UV light. Column chromatography was performed on silica gel (120–230 mesh). <sup>1</sup>H-NMR spectra were recorded on 500 MHz and <sup>13</sup>C on 125 MHz spectrometer using TMS as an internal standard. Chemical shifts are reported in parts per million (ppm, δ).

### General procedure for the synthesis of 1,4-disubstituted 1,2,3-triazoles:

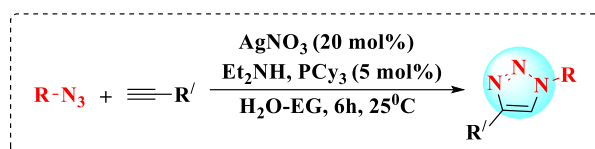

In a round bottom flask, a mixture of alkyne derivative (1.2 mmol), diethyl amine (1.2 mmol) and azide (1 mmol) was taken and silver nitrate (20 mol%) and tricyclohexylphosphine (5 mol%) were added to it and then allowed to stir at 25°C for the given time period as mentioned in **Figure 1** of the manuscript. Further in one pot protocol, instead of azide, organic bromide (1 mmol) as well as sodium azide (2 mmol) were employed keeping the other reactants intact (**Table 2** in the manuscript). For the [Ag(PCy<sub>3</sub>)<sub>2</sub>]NO<sub>3</sub> catalyzed reaction, the reactants were added in the similar fashion as mentioned earlier but in this reaction, both silver nitrate and tricyclohexylphosphine were replaced by 10 mol% of the synthesized complex (**Table 3** in the manuscript). The progress of the reaction was monitored by TLC. After completion of the reaction, it was extracted with ethyl acetate (3x10 mL), washed with distilled water and brine solution, dried over anhydrous sodium sulfate and

concentrated under reduced pressure. The resulting residue was purified through silica gel column chromatography to get the desired product.

### Complex preparation and characterization

From literature, it was found that silver nitrate can bind with one, two and three molecules of the PCy<sub>3</sub> ligand respectively, we have opted for the synthesis of all the three plausible complexes by the following procedure:

**Preparation of Ag(PCy<sub>3</sub>)<sub>2</sub>NO<sub>3</sub>:** AgNO<sub>3</sub> solution (1 mmol) in 5 ml acetonitrile was slowly added to a solution of tricyclohexylphosphine (2 mmol) in DCM and the mixture was stirred in room temperature. The clear solution obtained was filtered to remove any impurity present and the filtrate was kept undisturbed for slow evaporation. The white shining crystal obtained, analysed and subjected in the desired reaction as catalyst.

Similarly, Ag(PCy<sub>3</sub>)NO<sub>3</sub> and Ag(PCy<sub>3</sub>)<sub>3</sub>NO<sub>3</sub> were prepared by varying the molar ratio of AgNO<sub>3</sub> and PCy<sub>3</sub> as 1:1 and 1:3 unaltering the remaining conditions.

**Table S1: Synthesis of AgNO<sub>3</sub>-PCy<sub>3</sub> complexes**

| Ratio | AgNO <sub>3</sub>        | PCy <sub>3</sub>       | Physical State |
|-------|--------------------------|------------------------|----------------|
| 1:1   | 0.200 gm<br>(1.177 mmol) | 0.330g<br>(1.177 mmol) | Grey Crystal   |
| 1:2   | 0.200 gm<br>(1.177 mmol) | 0.660g<br>(2.354 mmol) | White Crystal  |
| 1:3   | 0.200 gm<br>(1.177 mmol) | 0.990g<br>(3.531 mmol) | White Crystal  |

The possible structures of the compounds are:

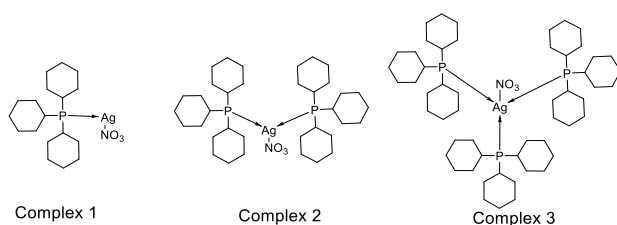



crystal data parameter is available in Table 1 (MS). The ORTEP with 50% probability ellipsoid is displayed in Figure 2 (MS). One of the CF<sub>3</sub> groups in the molecule is positional disordered and resolved in five locations with 0.60 site occupancies in each atom; whereas, the other CF<sub>3</sub> group is resolved in six locations with site occupancies viz. 0.75, 0.25, 0.75, 0.25, 0.60 and 0.40. Experimental section is referred for the details of the Single crystal X-ray data collection methods; CIF and CheckCIF (File name: BS\_RHP289) report are attached in this supplementary file.

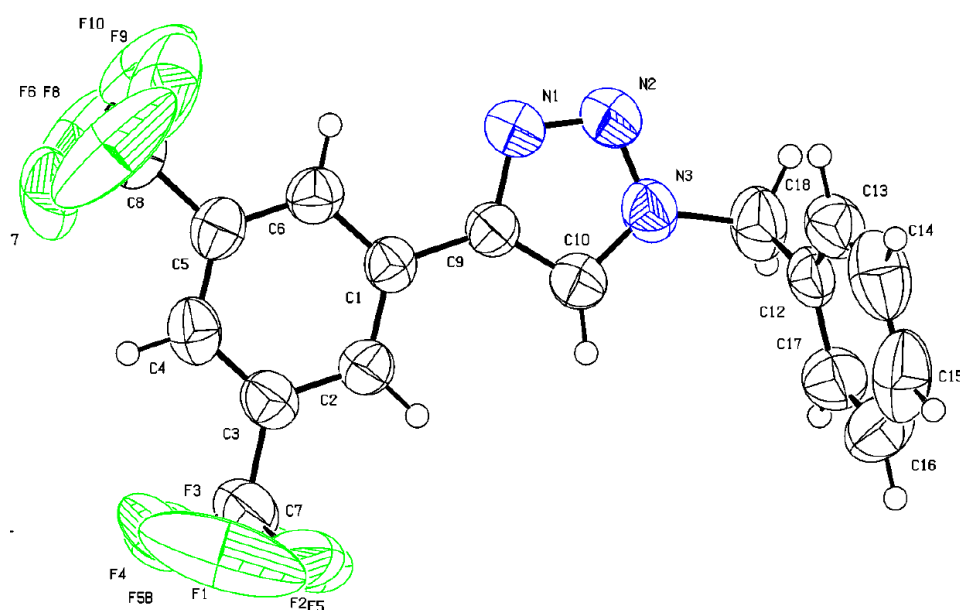

**Figure S2:** ORTEP of the synthesized molecule C<sub>17</sub>H<sub>11</sub>F<sub>6</sub>N<sub>3</sub> with 50% probability ellipsoid

**Table S2: Crystallographic parameters**

| Crystal data                          | [Ag(PCy <sub>3</sub> ) <sub>2</sub> ] <sub>2</sub> NO <sub>3</sub> | C <sub>17</sub> H <sub>11</sub> F <sub>6</sub> N <sub>3</sub> |
|---------------------------------------|--------------------------------------------------------------------|---------------------------------------------------------------|
| Formula unit                          | C <sub>36</sub> H <sub>55</sub> AgNO <sub>3</sub> P <sub>2</sub>   | C <sub>17</sub> H <sub>11</sub> F <sub>6</sub> N <sub>3</sub> |
| Formula weight (g mol <sup>-1</sup> ) | 719.62                                                             | 371.29                                                        |
| Crystal system                        | Triclinic                                                          | Monoclinic                                                    |
| T [K]                                 | 100                                                                | 100                                                           |
| <i>a</i> [Å]                          | 9.262(2)                                                           | 12.664(6)                                                     |
| <i>b</i> [Å]                          | 9.837(2)                                                           | 4.767(2)                                                      |
| <i>c</i> [Å]                          | 23.332(5)                                                          | 27.831(13)                                                    |
| $\alpha$ [°]                          | 94.658(6)                                                          | 90                                                            |
| $\beta$ [°]                           | 96.469(6)                                                          | 103.124(11)                                                   |

|                                       |                    |                            |
|---------------------------------------|--------------------|----------------------------|
| $\gamma$ [°]                          | 116.368(6)         | 90                         |
| Volume [Å <sup>3</sup> ]              | 1871.8(7)          | 1636.3(13)                 |
| Space group                           | <i>P</i> -1        | <i>P</i> 2 <sub>1</sub> /n |
| <i>Z</i>                              | 2                  | 4                          |
| D <sub>cal</sub> [g/cm <sup>3</sup> ] | 1.277              | 1.507                      |
| R <sub>1</sub> , wR <sub>2</sub>      | 0.0511, 0.1284     | 0.0458, 0.0960             |
| GOOF                                  | 1.067              | 1.003                      |
| Instrument                            | Bruker CCD Apex II | Bruker CCD Apex II         |
| CCDC No                               | 2254372            | 2254371                    |

**Table S3: Comparable study of the present work with some of the existing works**

| Literature                                          | Catalyst                                                                  | Catalyst preparation required | Reaction conditions                                       | Yield (%) | Substrate scope |
|-----------------------------------------------------|---------------------------------------------------------------------------|-------------------------------|-----------------------------------------------------------|-----------|-----------------|
| Zhao <i>et. al.</i> (2016) <sup>1</sup>             | Silver–polyamine nanocomposite                                            | Yes                           | H <sub>2</sub> O/80 <sup>0</sup> C/8h                     | 92        | 10 examples     |
| McNulty <i>et. al.</i> (2011) <sup>2</sup>          | N,N-diisopropyl(2-diphenylphosphanyl)benzamide: AgOAc                     | Yes                           | Toluene/caprylic acid (20 mol%)/ RT/ 48 h                 | 98        | 19 examples     |
| Ortega-Arizmendi <i>et. al.</i> (2013) <sup>3</sup> | AgCl (5 mol%)                                                             | No                            | H <sub>2</sub> O/acetone/RT/24 h                          | 64        | 20 examples     |
| El Ayouchia <i>et. al.</i> (2020) <sup>4</sup>      | AgCl (10 mol%)                                                            | No                            | H <sub>2</sub> O/RT/24 h                                  | 92        | 9 examples      |
| McNulty <i>et. al.</i> (2012) <sup>5</sup>          | Ag(OOCCH <sub>3</sub> ) (2 mol%)/ N,N-diisopropylamide substituent ligand | Yes                           | Toluene/90 <sup>0</sup> C/Caprylic acid/24 h              | 98        | 16 examples     |
| Garg <i>et. al.</i> (2019) <sup>6</sup>             | Ag–NHC@SiO <sub>2</sub>                                                   | Yes                           | H <sub>2</sub> O/quinine/60 <sup>0</sup> C/6h             | 98        | 22 examples     |
| This work                                           | AgNO <sub>3</sub> (20 mol%)                                               | No                            | H <sub>2</sub> O-EG/diethyl amine/PCy <sub>3</sub> /RT/6h | 95        | 50 examples     |

## Characterization of the compounds:

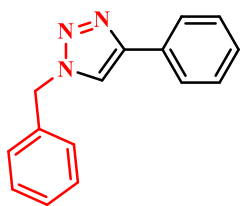

**1-benzyl-4-phenyl-1H-1,2,3-triazole<sup>7</sup> (3a):** White solid, mp 128-130°C, <sup>1</sup>H NMR (500 MHz, CDCl<sub>3</sub>) δ 7.74 (d, *J* = 7.6 Hz, 2H), 7.61 (s, 1H), 7.30 (ddd, *J* = 30.0, 11.0, 6.7 Hz, 8H), 5.51 (s, 2H).

<sup>13</sup>C NMR (125 MHz, CDCl<sub>3</sub>) δ 147.21 (s), 133.67 (s), 129.50 (s), 128.13 (s), 127.77 (d, *J* = 2.2 Hz), 127.09 (d, *J* = 13.2 Hz), 124.69 (s), 118.49 (s), 53.21 (s). MS (ESI) *m/z*: [M+H]<sup>+</sup> calcd for C<sub>15</sub>H<sub>13</sub>N<sub>3</sub> 236.11; Found 236.10

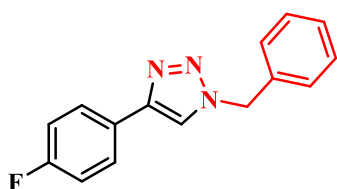

**1-benzyl-4-(4-fluorophenyl)-1H-1,2,3-triazole<sup>8</sup> (3b):** White solid, mp 109-110°C, <sup>1</sup>H NMR (500 MHz, CDCl<sub>3</sub>) δ 7.71 (d, *J* = 3.2 Hz, 2H), 7.58 (s, 1H), 7.37–7.18 (m, 5H), 7.03 (t, *J* = 8.6 Hz, 2H), 5.51 (s, 2H).

<sup>13</sup>C NMR (125 MHz, CDCl<sub>3</sub>) δ 162.77 (d, *J* = 247.2 Hz), 134.71 (s), 129.32 (s), 128.98 (s), 128.23 (s), 127.56 (d, *J* = 8.2 Hz), 126.88 (s), 119.45 (s), 116.01 (s), 115.84 (s), 54.40 (s). MS (ESI) *m/z*: [M+H]<sup>+</sup> calcd for C<sub>15</sub>H<sub>12</sub>FN<sub>3</sub> 254.10; Found 254.13

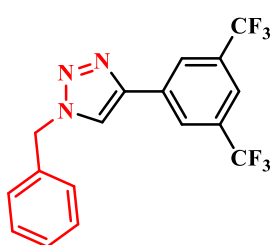

**1-benzyl-4-(3,5-bis(trifluoromethyl)phenyl)-1H-1,2,3-triazole(3c):** White solids, mp.: 95°C. <sup>1</sup>H NMR (500 MHz, CDCl<sub>3</sub>) δ 8.27 (s, 2H), 7.85 (s, 1H), 7.82 (s, 1H), 7.47 – 7.38 (m, 3H), 7.38 – 7.32 (m, 2H), 5.63 (s, 2H).

<sup>13</sup>C NMR (125 MHz, CDCl<sub>3</sub>) δ 145.65 (s), 134.22 (s), 132.79 (s), 132.32 (q, *J* = 33.5 Hz), 129.45 (s), 129.22 (s), 128.30 (s), 125.70 (s), 124.38 (s), 122.22 (s), 121.65 (q), 120.62 (s), 54.64 (s). MS (ESI) *m/z*: [M+H]<sup>+</sup> calcd for C<sub>17</sub>H<sub>11</sub>F<sub>6</sub>N<sub>3</sub> 372.09; Found 372.10

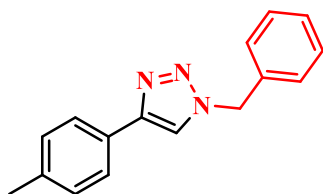

**1-benzyl-4-(p-tolyl)-1H-1,2,3-triazole<sup>9</sup> (3d):** Pale yellow solid, mp 150-152 °C. <sup>1</sup>H NMR (500 MHz, CDCl<sub>3</sub>) δ 7.69 (d, *J* = 8.1 Hz, 2H), 7.63 (s, 1H), 7.37 (dd, *J* = 8.0, 5.8 Hz, 3H), 7.31 (dd, *J* = 7.5, 1.6 Hz, 2H), 7.20 (d, *J* = 8.1 Hz, 2H), 5.56 (s, 2H), 2.36 (s, 3H).

<sup>13</sup>C NMR (125 MHz, CDCl<sub>3</sub>) δ 148.39 (s), 138.16 (s), 134.82 (s), 129.61 (s), 129.26 (s), 128.88 (s), 128.19 (s), 127.73 (s), 125.73 (s), 119.33 (s), 54.33 (s), 21.41 (s). MS (ESI) *m/z*: [M+H]<sup>+</sup> calcd for C<sub>16</sub>H<sub>15</sub>N<sub>3</sub> 250.13; Found 250.10

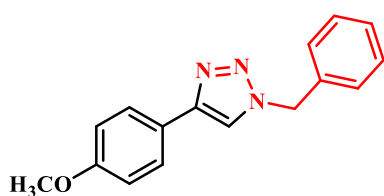

**1-benzyl-4-(4-methoxyphenyl)-1H-1,2,3-triazole<sup>10</sup> (3e):** Pale yellow solid, mp 142-144 °C. <sup>1</sup>H NMR (500 MHz, CDCl<sub>3</sub>) δ 7.72 (d, *J* = 8.7 Hz, 2H), 7.57 (s, 1H), 7.43 – 7.34 (m, 3H), 7.34 – 7.27 (m, 2H), 6.93 (d, *J* = 8.8 Hz, 2H), 5.56 (s, 2H), 3.83 (s, 3H).

$^{13}\text{C}$  NMR (125 MHz,)  $\delta$  159.62 (s), 148.12 (s), 134.79 (s), 129.14 (s), 128.75 (s), 128.06 (s), 127.02 (s), 123.30 (s), 118.68 (s), 114.23 (s), 55.32 (s), 54.21 (s). MS (ESI)  $m/z$ :  $[\text{M}+\text{H}]^+$  calcd for  $\text{C}_{16}\text{H}_{15}\text{N}_3\text{O}$  266.12; Found 266.11

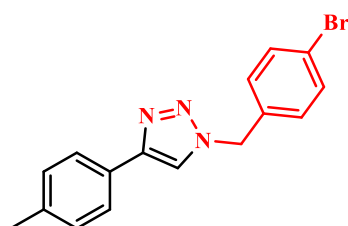

**1-(4-bromobenzyl)-4-(p-tolyl)-1H-1,2,3-triazole<sup>11</sup> (3f):** Pale yellow solid, m.p 202–204°C:  $^1\text{H}$  NMR (500 MHz, )  $\delta$  7.68 (d,  $J$  = 7.8 Hz, 2H), 7.62 (s, 1H), 7.51 (d,  $J$  = 8.1 Hz, 2H), 7.19 (m, 4H), 5.51 (s, 2H), 2.36 (s, 3H).

$^{13}\text{C}$  NMR (125 MHz,)  $\delta$  148.51 (s), 138.16 (s), 133.78 (s), 132.33 (s), 129.59 (d,  $J$  = 19.0 Hz), 127.55 (s), 125.63 (s), 122.93 (s), 119.08 (s), 53.51 (s), 21.29 (s). MS (ESI)  $m/z$ :  $[\text{M}+\text{H}]^+$  calcd for  $\text{C}_{16}\text{H}_{14}\text{BrN}_3$  328.04; Found 328.07

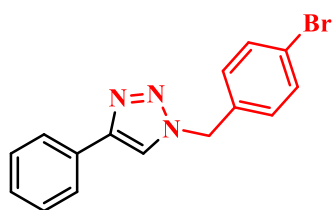

**1-(4-bromobenzyl)-4-phenyl-1H-1,2,3-triazole<sup>10</sup> (3g):** White solid, mp 150-152°C,  $^1\text{H}$  NMR (500 MHz,  $\text{CDCl}_3$ )  $\delta$  7.79 (d,  $J$  = 7.3 Hz, 2H), 7.67 (s, 1H), 7.51 (d,  $J$  = 8.4 Hz, 2H), 7.40 (t,  $J$  = 7.6 Hz, 2H), 7.32 (t,  $J$  = 7.4 Hz, 1H), 7.17 (d,  $J$  = 8.3 Hz, 2H), 5.52 (s, 2H).

$^{13}\text{C}$  NMR (125 MHz,  $\text{CDCl}_3$ )  $\delta$  148.52 (s), 133.83 (s), 132.45 (s), 130.45 (s), 129.79 (s), 128.99 (s), 128.44 (s), 125.83 (s), 123.08 (s), 119.61 (s), 53.65 (s). MS (ESI)  $m/z$ :  $[\text{M}+\text{H}]^+$  calcd for  $\text{C}_{15}\text{H}_{12}\text{BrN}_3$  314.02; Found 314.05

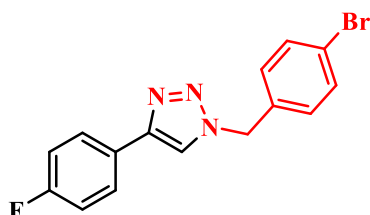

**1-(4-bromobenzyl)-4-(4-fluorophenyl)-1H-1,2,3-triazole (3h):** Pale yellow solid,  $^1\text{H}$  NMR (500 MHz,  $\text{CDCl}_3$ )  $\delta$  7.72 (dd,  $J$  = 7.9, 5.6 Hz, 2H), 7.58 (s, 1H), 7.47 (d,  $J$  = 8.2 Hz, 2H), 7.14 (d,  $J$  = 8.1 Hz, 2H), 7.05 (dd,  $J$  = 12.6, 4.7 Hz, 2H), 5.47 (s, 2H).

$^{13}\text{C}$  NMR (125 MHz,  $\text{CDCl}_3$ )  $\delta$  163.16 (d,  $J$  = 247.3 Hz), 147.97 (s), 135.63 (s), 134.06 (s), 132.80 (s), 130.12 (s), 127.91 (d,  $J$  = 8.4 Hz), 125.47 (s), 123.46 (s), 119.64 (s), 116.35 (s), 116.21 (s), 54.01 (s).

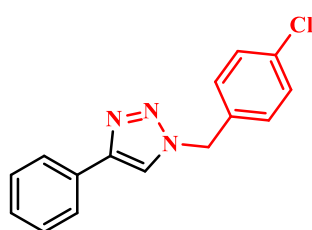

**1-(4-chlorobenzyl)-4-phenyl-1H-1,2,3-triazole<sup>2</sup> (3i):** White solid, mp 138-140°C,  $\text{C}_{15}\text{H}_{12}\text{ClN}_3$ ;  $^1\text{H}$  NMR (500 MHz,  $\text{CDCl}_3$ )  $\delta$  7.82 (d,  $J$  = 7.7 Hz, 2H), 7.69 (s, 1H), 7.46 – 7.30 (m, 5H), 7.26 (d,  $J$  = 8.3 Hz, 2H), 5.55 (s, 2H).

$^{13}\text{C}$  NMR (125 MHz,  $\text{CDCl}_3$ )  $\delta$  148.79 (s), 135.24 (s), 133.62 (s), 130.78 (s), 129.77 (s), 129.25 (s), 128.69 (s), 126.12 (s), 119.87 (s), 53.87 (s). MS (ESI)  $m/z$ :  $[\text{M}+\text{H}]^+$  calcd for  $\text{C}_{15}\text{H}_{12}\text{ClN}_3$  270.07; Found 270.05



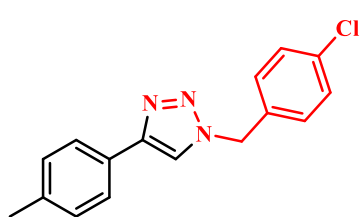

**1-(4-chlorobenzyl)-4-(p-tolyl)-1H-1,2,3-triazole<sup>12</sup> (3j):** Off-white solid; mp. 140–143°C: <sup>1</sup>H NMR (500 MHz, CDCl<sub>3</sub>) δ 7.61 (d, *J* = 7.6 Hz, 2H), 7.55 (s, 1H), 7.28 (d, *J* = 7.6 Hz, 2H), 7.24 – 7.09 (m, 4H), 5.46 (s, 2H), 2.29 (s, 3H).

<sup>13</sup>C NMR (125 MHz, CDCl<sub>3</sub>) δ 148.47(s), 138.19 (s), 134.84 (s), 133.22 (s), 129.53 (s), 129.38 (d, *J* = 3.2 Hz), 127.48 (s), 125.64 (s), 119.13 (s), 53.51 (s), 21.30 (s). MS (ESI) *m/z*: [M+H]<sup>+</sup> calcd for C<sub>16</sub>H<sub>14</sub>ClN<sub>3</sub> 284.09; Found 284.10

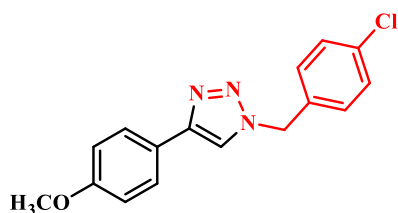

**1-(4-chlorobenzyl)-4-(4-methoxyphenyl)-1H-1,2,3-triazole (3k):** White solids: <sup>1</sup>H NMR (500 MHz, CDCl<sub>3</sub>) δ 7.72 (d, *J* = 8.7 Hz, 2H), 7.58 (s, 1H), 7.36 (d, *J* = 8.4 Hz, 2H), 7.25 (d, *J* = 8.4 Hz, 2H), 6.94 (d, *J* = 8.7 Hz, 2H), 5.54 (s, 2H), 3.84 (s, 3H). MS (ESI) *m/z*: [M+H]<sup>+</sup> calcd for C<sub>16</sub>H<sub>14</sub>ClN<sub>3</sub>O 300.08; Found 300.10

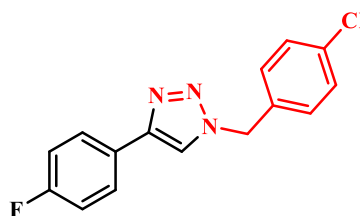

**1-(4-chlorobenzyl)-4-(4-fluorophenyl)-1H-1,2,3-triazole (3l):** White solids, mp. 105-107°C : <sup>1</sup>H NMR (500 MHz, ) δ 7.79 – 7.73 (m, 2H), 7.63 (s, 1H), 7.36 (d, *J* = 8.4 Hz, 2H), 7.24 (d, *J* = 8.4 Hz, 2H), 7.09 (t, *J* = 8.6 Hz, 2H), 5.53 (s, 2H).

<sup>13</sup>C NMR (125 MHz,) δ 162.73 (d, *J* = 247.8 Hz), 147.54 (s), 134.92 (s), 133.11 (s), 129.40 (s), 127.47 (d, *J* = 7.9 Hz), 126.62 (d, *J* = 2.7 Hz), 119.19 (s), 115.91 (s), 115.77 (s), 53.51 (s). MS (ESI) *m/z*: [M+H]<sup>+</sup> calcd for C<sub>15</sub>H<sub>11</sub>ClFN<sub>3</sub> 288.06; Found 288.05

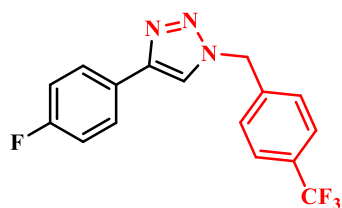

**4-(4-fluorophenyl)-1-(4-(trifluoromethyl)benzyl)-1H-1,2,3-triazole (3m):** <sup>1</sup>H NMR (500 MHz, CDCl<sub>3</sub>) δ 7.73 (dd, *J* = 8.3, 5.5 Hz, 2H), 7.61 (s, 2H), 7.60 (s, 1H), 7.37 (d, *J* = 8.0 Hz, 2H), 7.05 (t, *J* = 8.6 Hz, 2H), 5.59 (s, 2H)

<sup>13</sup>C NMR (125 MHz, CDCl<sub>3</sub>) δ 161.64 (d, *J* = 247.7 Hz), 146.58 (s), 137.42 (s), 130.01, 127.07 (s), 126.36 (d, *J* = 8.2 Hz), 125.05 (q), 118.16 (s), 114.81 (s), 114.67 (s), 52.46 (s). MS (ESI) *m/z*: [M+H]<sup>+</sup> calcd for C<sub>16</sub>H<sub>11</sub>F<sub>4</sub>N<sub>3</sub> 322.09; Found 322.12

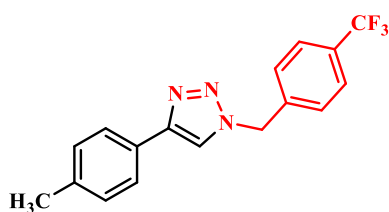

**4-(p-tolyl)-1-(4-(trifluoromethyl)benzyl)-1H-1,2,3-triazole (3n):** Off White solids, m.p. 150-152°C: <sup>1</sup>H NMR (500 MHz, CDCl<sub>3</sub>) δ 7.72 – 7.61 (m, 5H), 7.40 (d, *J* = 8.1 Hz, 2H), 7.22 (d, *J* = 8.0 Hz, 2H), 5.63 (s, 2H), 2.37 (s, 3H).

<sup>13</sup>C NMR (125 MHz, CDCl<sub>3</sub>) δ 148.67 (s), 138.77 (s), 138.28 (s), 131.07 (q, *J* = 32.7 Hz), 129.58 (s), 128.20 (s), 127.48 (s), 126.16

(q), 125.68 (s), 119.26 (s), 53.54 (s), 21.31 (s). MS (ESI) m/z:  $[M+H]^+$  calcd for  $C_{17}H_{14}F_3N_3$  318.11; Found 318.09

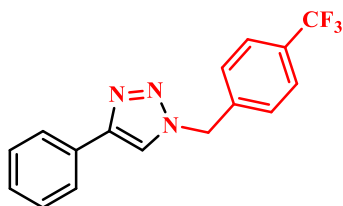

**4-phenyl-1-(4-(trifluoromethyl)benzyl)-1H-1,2,3-triazole (3o):**

White solids, m.p: 117-119°C:  $^1H$  NMR (500 MHz,  $CDCl_3$ )  $\delta$  7.72 (d,  $J = 7.7$  Hz, 2H), 7.64 (s, 1H), 7.55 (d,  $J = 7.9$  Hz, 2H), 7.32 (t,  $J = 7.2$  Hz, 4H), 7.24 (d,  $J = 7.2$  Hz, 1H), 5.55 (s, 2H).

$^{13}C$  NMR (125 MHz,  $CDCl_3$ )  $\delta$  147.77 (s), 137.91 (s),  $\delta$  130.29 (q,  $J = 32.7$  Hz), 129.47 (s), 128.13 (s), 127.64 (s), 127.44 (s), 125.38 (q), 124.99 (s), 122.12 (s), 118.93 (s), 52.80 (s). MS (ESI) m/z:  $[M+H]^+$  calcd for  $C_{16}H_{12}F_3N_3$  304.10; Found 304.09

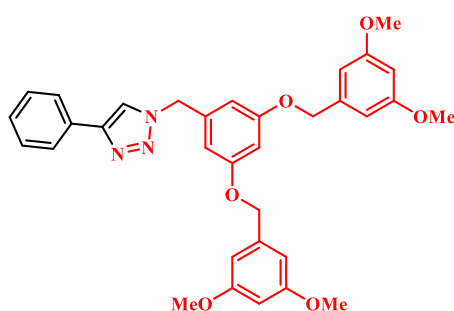

**1-(3,5-bis((3,5-dimethoxybenzyl)oxy)benzyl)-4-phenyl-1H-1,2,3-triazole (3p):**

Pale yellow liquid.  $^1H$  NMR (500 MHz,  $CDCl_3$ )  $\delta$  7.72 (d,  $J = 7.9$  Hz, 2H), 7.57 (s, 1H), 7.34–7.24 (m, 3H), 6.50 (d,  $J = 5.8$  Hz, 2H), 6.46 (d,  $J = 4.4$  Hz, 5H), 6.32 (s, 2H), 5.40 (s, 2H), 4.87 (s, 4H), 3.70 (s, 12H).

$^{13}C$  NMR (125 MHz,  $CDCl_3$ )  $\delta$  160.99 (s), 160.35 (s), 138.76 (s), 128.80 (s), 125.72 (s), 107.23 (s), 105.21 (s), 99.96 (s), 70.10 (s), 59.75 (s), 55.37 (s). MS (ESI) m/z:  $[M+H]^+$  calcd for  $C_{33}H_{33}N_3O_6$  568.24; Found 568.22

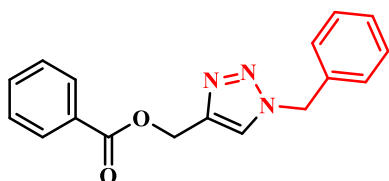

**(1-benzyl-1H-1,2,3-triazol-4-yl)methyl benzoate<sup>13</sup> (3q):**

White solid, mp 84-86°C:  $^1H$  NMR (500 MHz,  $CDCl_3$ )  $\delta$  8.02 (d,  $J = 7.9$  Hz, 2H), 7.61 (s, 1H), 7.54 (t,  $J = 7.4$  Hz, 1H), 7.45 – 7.33 (m, 5H), 7.29 – 7.26 (m, 2H), 5.52 (s, 2H), 5.44 (s, 2H).

$^{13}C$  NMR (125 MHz,  $CDCl_3$ )  $\delta$  166.45 (s), 143.36 (s), 134.41 (s), 133.20 (s), 129.76 (s), 129.18 (s), 128.86 (s), 128.40 (s), 128.17 (s), 123.85 (s), 58.10 (s), 54.26 (s). MS (ESI) m/z:  $[M+H]^+$  calcd for  $C_{17}H_{15}N_3O_2$  294.12; Found 294.11

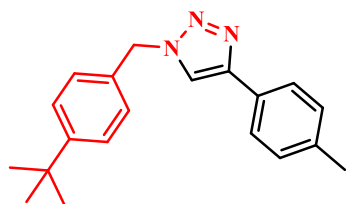

**1-(4-(tert-butyl)benzyl)-4-(p-tolyl)-1H-1,2,3-triazole<sup>14</sup> (3r):**

White solid, mp 109-110 °C:  $^1H$  NMR (500 MHz,  $CDCl_3$ )  $\delta$  7.66 (d,  $J = 8.1$  Hz, 2H), 7.60 (s, 1H), 7.33-7.39 (m, 4H), 7.18 (d,  $J = 8.0$  Hz, 2H), 5.51 (s, 2H), 2.34 (s, 3H), 1.30 (s, 9H).

$^{13}C$  NMR (125 MHz,  $CDCl_3$ )  $\delta$  138.03 (s), 131.79 (s), 129.55 (s), 127.98 (s), 127.57 (s), 125.65 (d,  $J = 8.6$  Hz), 119.20 (s), 54.01 (s), 34.73 (s), 31.35 (s), 21.36 (s).

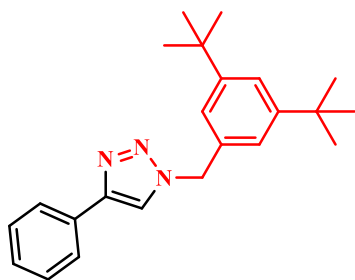

**1-(3,5-di-tert-butylbenzyl)-4-phenyl-1H-1,2,3-triazole (3s):** white solid:  $^1\text{H}$  NMR (500 MHz,  $\text{CDCl}_3$ )  $\delta$  7.83 (d,  $J$  = 7.6 Hz, 2H), 7.69 (s, 1H), 7.44 (dd,  $J$  = 16.9, 9.3 Hz, 3H), 7.34 (t,  $J$  = 7.4 Hz, 1H), 7.19 (d,  $J$  = 1.4 Hz, 2H), 5.58 (s, 2H), 1.34 (s, 18H).

$^{13}\text{C}$  NMR (125 MHz,  $\text{CDCl}_3$ )  $\delta$  151.92 (s), 128.80 (s), 128.10 (s), 125.73 (s), 122.87 (s), 122.42 (s), 119.42 (s), 54.90 (s), 34.92 (s), 31.41 (s). MS (ESI)  $m/z$ :  $[\text{M}+\text{H}]^+$  calcd for  $\text{C}_{23}\text{H}_{29}\text{N}_3$  348.24; Found 348.22

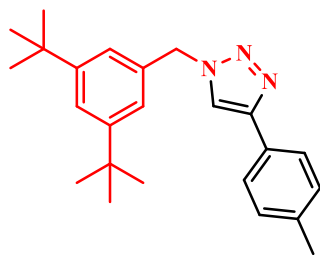

**1-(3,5-di-tert-butylbenzyl)-4-(p-tolyl)-1H-1,2,3-triazole (3t):** Pale yellow liquid:  $^1\text{H}$  NMR (500 MHz,  $\text{CDCl}_3$ )  $\delta$  7.62 (d,  $J$  = 8.0 Hz, 2H), 7.55 (s, 1H), 7.35 (s, 1H), 7.13 (d,  $J$  = 7.9 Hz, 2H), 7.08 (s, 2H), 5.47 (s, 2H), 2.29 (s, 3H), 1.23 (s, 18H).

$^{13}\text{C}$  NMR (101 MHz,  $\text{CHLOROFORM-D}$ )  $\delta$  151.79 (s), 137.89 (s), 133.82 (s), 129.46 (s), 125.60 (s), 122.79 (s), 122.39 (s), 121.97 (s), 121.29 (s), 119.09 (s), 54.83 (s), 34.88 (s), 31.44 (d,  $J$  = 7.0 Hz), 21.30 (s). MS (ESI)  $m/z$ :  $[\text{M}+\text{H}]^+$  calcd for  $\text{C}_{24}\text{H}_{31}\text{N}_3$  362.25; Found 362.28

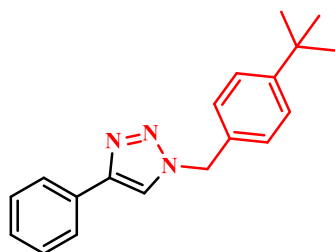

**1-(4-(tert-butyl)benzyl)-4-phenyl-1H-1,2,3-triazole (3u):** White solid, mp 114–115°C :  $^1\text{H}$  NMR (500 MHz,  $\text{CDCl}_3$ )  $\delta$  7.72 (d,  $J$  = 8.1 Hz, 2H), 7.58 (s, 1H), 7.31 (t,  $J$  = 7.7 Hz, 4H), 7.23 – 7.16 (m, 3H), 5.46 (s, 2H), 1.24 (s, 9H).

$^{13}\text{C}$  NMR (125 MHz,  $\text{CDCl}_3$ )  $\delta$  151.91 (s), 148.10 (s), 131.64 (s), 130.60 (s), 128.78 (s), 128.11 (s), 127.89 (s), 127.46 (s), 126.07 (s), 125.60 (d,  $J$  = 18.4 Hz), 119.48 (s), 53.94 (s), 34.65 (s), 31.27 (s). MS (ESI)  $m/z$ :  $[\text{M}+\text{H}]^+$  calcd for  $\text{C}_{19}\text{H}_{21}\text{N}_3$  292.17; Found 292.15

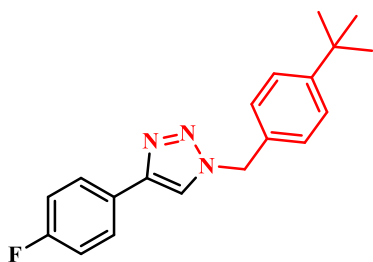

**1-(4-(tert-butyl)benzyl)-4-(4-fluorophenyl)-1H-1,2,3-triazole (3v):** Pale yellow liquid,  $^1\text{H}$  NMR (500 MHz,  $\text{CDCl}_3$ )  $\delta$  7.71 – 7.65 (m, 2H), 7.53 (s, 1H), 7.33 (d,  $J$  = 8.2 Hz, 2H), 7.18 – 7.16 (m, 2H), 7.00 (t,  $J$  = 8.7 Hz, 2H), 5.45 (s, 2H), 1.23 (s, 9H).

$^{13}\text{C}$  NMR (125 MHz,  $\text{CDCl}_3$ )  $\delta$  162.71 (d,  $J$  = 247.0 Hz), 152.08 (s), 147.35 (s), 131.63 (s), 127.99 (s), 127.51 (d,  $J$  = 7.8 Hz), 126.18 (s), 125.11 (s), 119.27 (s), 115.90 (s), 115.76 (s), 54.06 (s), 34.74 (s), 31.33 (s). MS (ESI)  $m/z$ :  $[\text{M}+\text{H}]^+$  calcd for  $\text{C}_{19}\text{H}_{20}\text{FN}_3$  310.16; Found 310.15

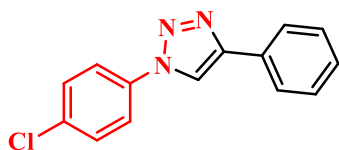

**1-(4-chlorophenyl)-4-phenyl-1H-1,2,3-triazole (3w):** Yellow liquid,  $^1\text{H}$  NMR (500 MHz, Chloroform-*d*)  $\delta$  8.11 (s, 1H), 7.84 (d,  $J = 7.7$  Hz, 2H), 7.69 (d,  $J = 8.5$  Hz, 2H), 7.47 (d,  $J = 8.3$  Hz, 2H), 7.41 (s, 1H), 7.33 (d,  $J = 7.4$  Hz, 2H). MS (ESI)  $m/z$ :  $[\text{M}+\text{H}]^+$  calcd for  $\text{C}_{14}\text{H}_{10}\text{ClN}_3$  256.06; Found 256.08

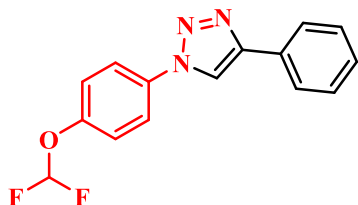

**1-(4-(difluoromethoxy)phenyl)-4-phenyl-1H-1,2,3-triazole (3x):** Pale yellow solid,  $^1\text{H}$  NMR (500 MHz, Chloroform-*d*)  $\delta$  8.10 (s, 1H), 7.84 (d,  $J = 7.5$  Hz, 2H), 7.74 (d,  $J = 9.2$  Hz, 2H), 7.40 (t,  $J = 7.5$  Hz, 2H), 7.31 (t,  $J = 7.4$  Hz, 1H), 7.25 (d,  $J = 8.5$  Hz, 2H), 6.52 (t,  $J = 72.8$  Hz, 1H).

$^{13}\text{C}$  NMR (125 MHz, Chloroform-*d*)  $\delta$  148.78 (d,  $J = 283.3$  Hz), 133.38, 129.09, 128.00, 127.60, 124.91, 121.07, 120.03, 116.63. MS (ESI)  $m/z$ :  $[\text{M}+\text{H}]^+$  calcd for  $\text{C}_{15}\text{H}_{11}\text{F}_2\text{N}_3\text{O}$  288.09; Found 288.08

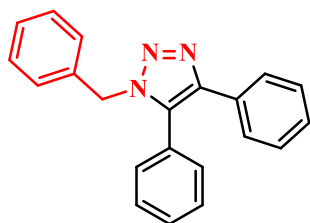

**1-benzyl-4,5-diphenyl-1H-1,2,3-triazole (3y):** Brown liquid,  $^1\text{H}$  NMR (500 MHz, Chloroform-*d*)  $\delta$  7.49 – 7.45 (m, 2H), 7.40 (t,  $J = 7.4$  Hz, 1H), 7.34 (t,  $J = 7.5$  Hz, 2H), 7.17 (dd,  $J = 8.8, 4.7$  Hz, 6H), 7.06 (d,  $J = 7.4$  Hz, 2H), 6.94 (dd,  $J = 6.7, 2.9$  Hz, 2H), 5.32 (s, 2H).

$^{13}\text{C}$  NMR (125 MHz, Chloroform-*d*)  $\delta$  143.44, 134.32, 130.58, 129.06, 128.66, 128.14, 127.67, 127.42, 127.12, 126.46, 125.67, 50.99. MS (ESI)  $m/z$ :  $[\text{M}+\text{H}]^+$  calcd for  $\text{C}_{21}\text{H}_{17}\text{N}_3$  312.14; Found 312.10

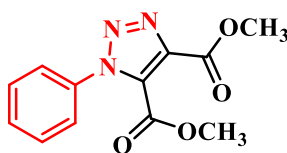

**Dimethyl 1-phenyl-1H-1,2,3-triazole-4,5-dicarboxylate (3z):** White solid,  $^1\text{H}$  NMR (500 MHz, Chloroform-*d*)  $\delta$  7.63 – 7.59 (m, 5H), 4.07 (s, 3H), 3.97 (s, 3H).

$^{13}\text{C}$  NMR (125 MHz, Chloroform-*d*)  $\delta$  160.23, 159.49, 138.74, 135.51, 132.53, 130.62, 129.70, 124.30, 52.82. MS (ESI)  $m/z$ :  $[\text{M}+\text{H}]^+$  calcd for  $\text{C}_{12}\text{H}_{11}\text{N}_3\text{O}_4$  262.07; Found 262.05

## References

1. Zhao, X. L.; Yang, K. F.; Zhang, Y.; Xu, L. W.; Guo, X. Q. Silver nanoparticles embedded in modified polyallylamine resin as efficient catalysts for alkyne–azide 1,3-dipolar cycloaddition in water. *Catal. Commun.* 2016, 74, 110–114.
2. McNulty, J.; Keskar, K.; Vemula, R. The first well-defined silver(i)-complex-catalyzed cycloaddition of azides onto terminal alkynes at room temperature. *Chem. Eur. J.* 2011, 17, 14727–14730.
3. Ortega-Arizmendi, A.I.; Aldeco-Pérez, E.; Cuevas-Yañez, E. Alkyne-Azide Cycloaddition Catalyzed by Silver Chloride and “Abnormal” Silver N-Heterocyclic Carbene Complex. *Sci. World J.* 2013, 2013, 186537.
4. El Ayouchia, H. B.; Bahsis, L.; Fichtali, I.; Domingo, L. R.; Rios-Gutierrez, M.; Julve, M.; Stiriba, S. E. Deciphering the Mechanism of Silver Catalysis of “Click” Chemistry in Water by Combining Experimental and MEDT Studies. *Catalysts* 2020, 10, 956.
5. McNulty, J.; Keskar, K. Discovery of a Robust and Efficient Homogeneous Silver(I) Catalyst for the Cycloaddition of Azides onto Terminal Alkynes. *Eur. J. Org. Chem.* 2012, 2012, 5462–5470.
6. Garg, A.; Khupse, N.; Bordoloi, A.; Sarma, D. Ag–NHC anchored on silica: an efficient ultra-low loading catalyst for regioselective 1, 2, 3-triazole synthesis. *New J. Chem.* 2019, 43, 19331-19337.
7. Campbell-Verduyn, L.S.; Mirfeizi, L.; Dierckx, R.A.; Elsinga, P.H.; Feringa, B.L. Phosphoramidite accelerated copper(i)-catalyzed [3 + 2] cycloadditions of azides and alkynes. *Chem. Commun.* 2009, 2139-2141.
8. Huang, L.; Liu, W.; Wu, J.; Fu, Y. Wang, K.; Huo, C.; Du, Z. Nano-copper catalyzed three-component reaction to construct 1,4-substituted 1,2,3-triazoles. *Tetrahedron lett.* 2014, 55, 2312-2316.
9. Shin, J.A.; Oh, S.J.; Lee, H.Y.; Lim, Y.G. An efficient Cu-catalyzed azide–alkyne cycloaddition (CuAAC) reaction in aqueous medium with a zwitterionic ligand, betaine. *Catal. Sci. Technol.* 2017, 7, 2450-2456.
10. Naeimi, H.; Dadashzadeh, S.; Moradian, M. Facile and efficient sonochemical synthesis of 1,4-disubstituted 1,2,3-triazole derivatives catalyzed by CuI under mild conditions. *Res. Chem. Intermed.* 2015, 5, 2687-2695.
11. Chavan, P. V.; Pandit K. S., Desai, U. V.; Kulkarni, M. A.; Wadgaonkar P.P. Cellulose supported cuprous iodide nanoparticles (Cell-CuI NPs): a new heterogeneous and recyclable catalyst for the one pot synthesis of 1,4-disubstituted – 1,2,3-triazoles in water. *RSC Adv.*, 2014,4, 42137-42146.
12. Lopez-Ruiz, H.; Cerda-Pedro, J.E.D.L.; Rojas-Lima, S.; Perez-Perez, I.; Rodriguez-Sanchez, B.V.; Santillan, R.; Coreno, O. Cuprous oxide on charcoal-catalyzed ligand-free synthesis of 1,4-disubstituted 1,2,3-triazoles via click chemistry. *ARKIVOC* 2013, (iii), 139-164.
13. Gupta, S.; Singh, A.; Narula, A. K. A Green Methodology for the Synthesis of Some Regioselective 1, 4-Disubstituted 1,2,3-Triazoles via Laccase-Mediated Click Reaction. *Chemistryselect*, 2022, 7, e202200498.

$^1\text{H}$ -NMR spectrum of 1-benzyl-4-phenyl-1H-1,2,3-triazole (3a)

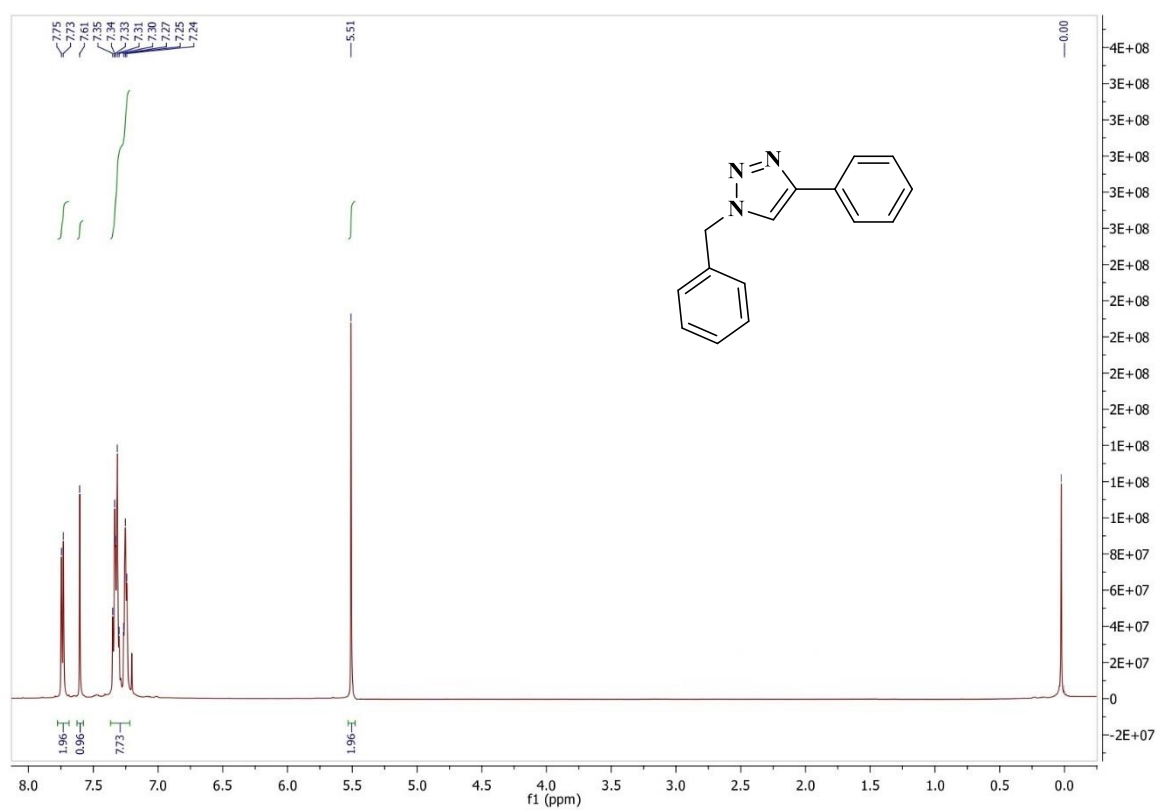

$^{13}\text{C}$ -NMR spectrum of 1-benzyl-4-phenyl-1H-1,2,3-triazole (3a)

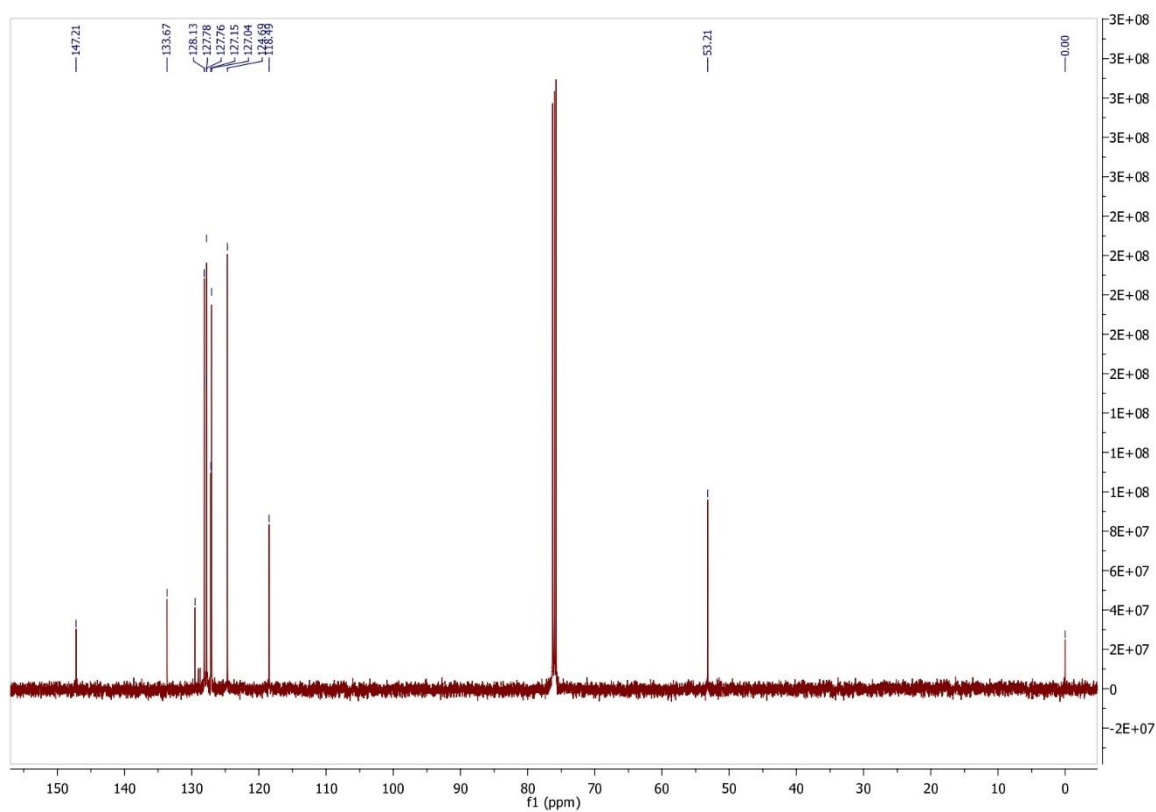

$^1\text{H}$ -NMR spectrum of 1-benzyl-4-(4-fluorophenyl)-1H-1,2,3-triazole (3b)

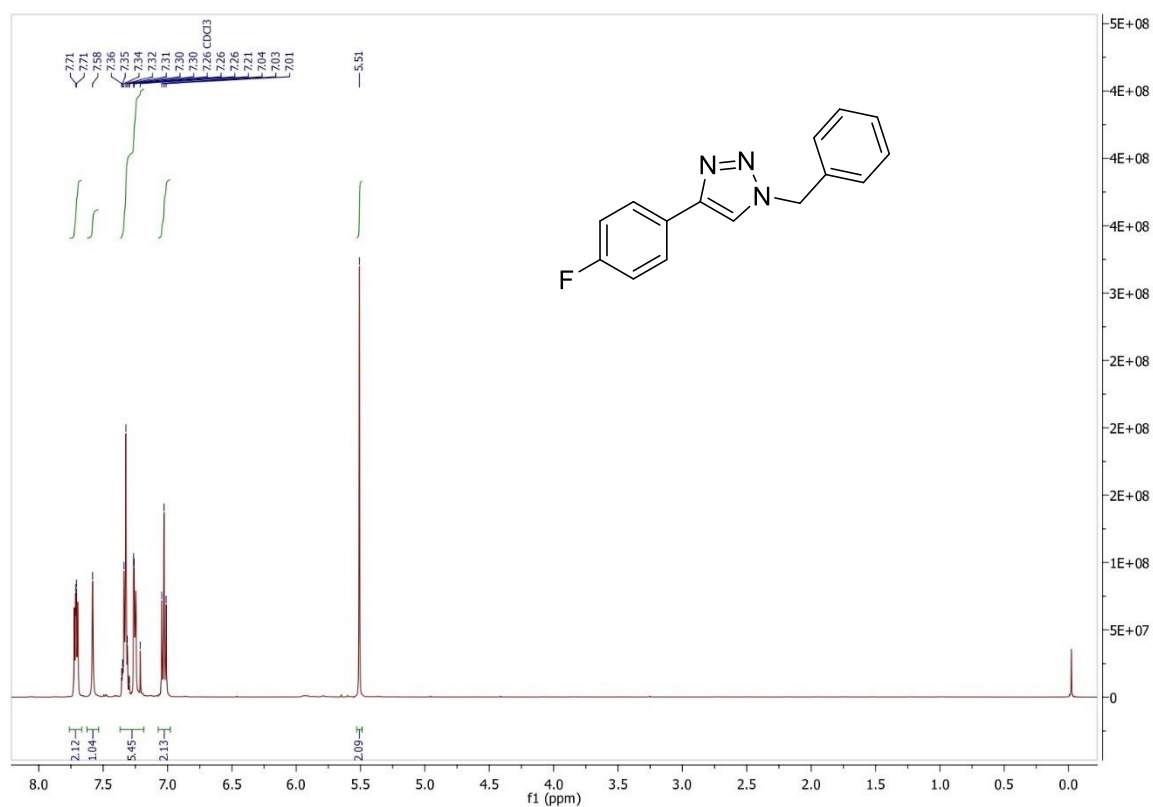

$^{13}\text{C}$ -NMR spectrum of 1-benzyl-4-(4-fluorophenyl)-1H-1,2,3-triazole (3b)

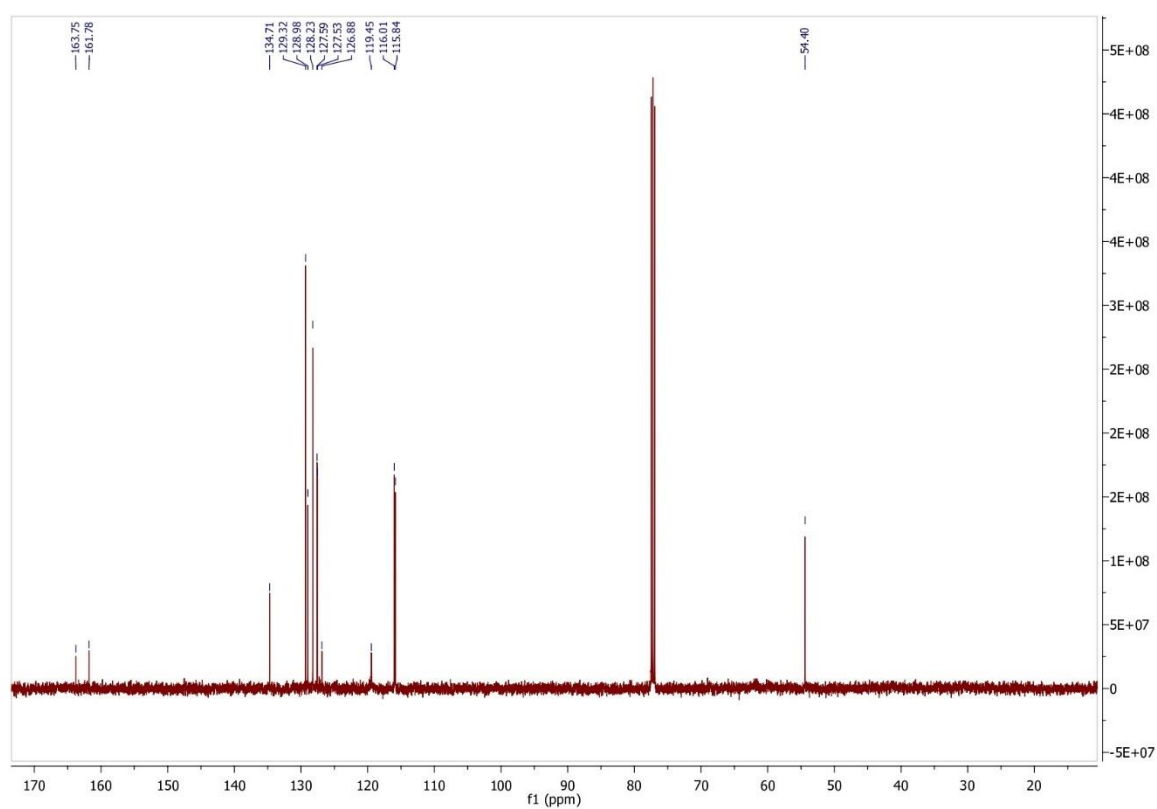

$^1\text{H}$ -NMR spectrum of 1-benzyl-4-(3,5-bis(trifluoromethyl)phenyl)-1H-1,2,3-triazole (3c)

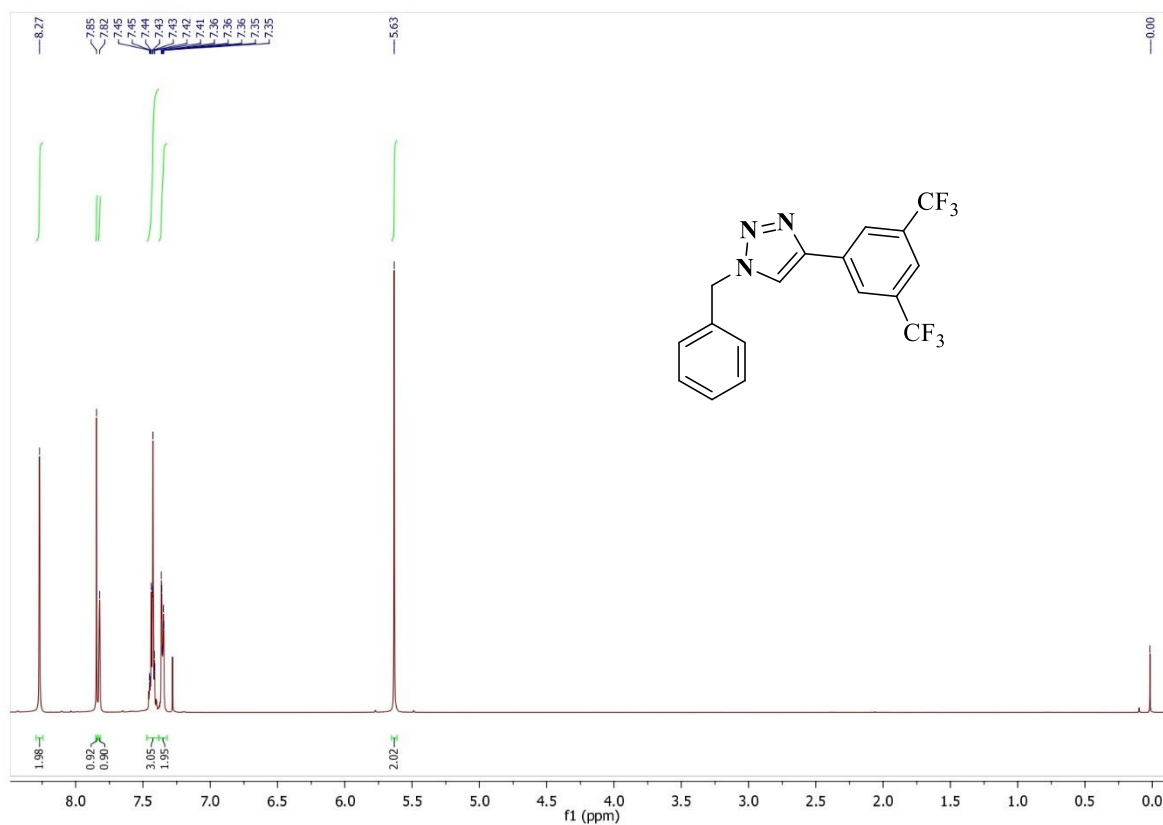

$^{13}\text{C}$ -NMR spectrum of 1-benzyl-4-(3,5-bis(trifluoromethyl)phenyl)-1H-1,2,3-triazole (3c)

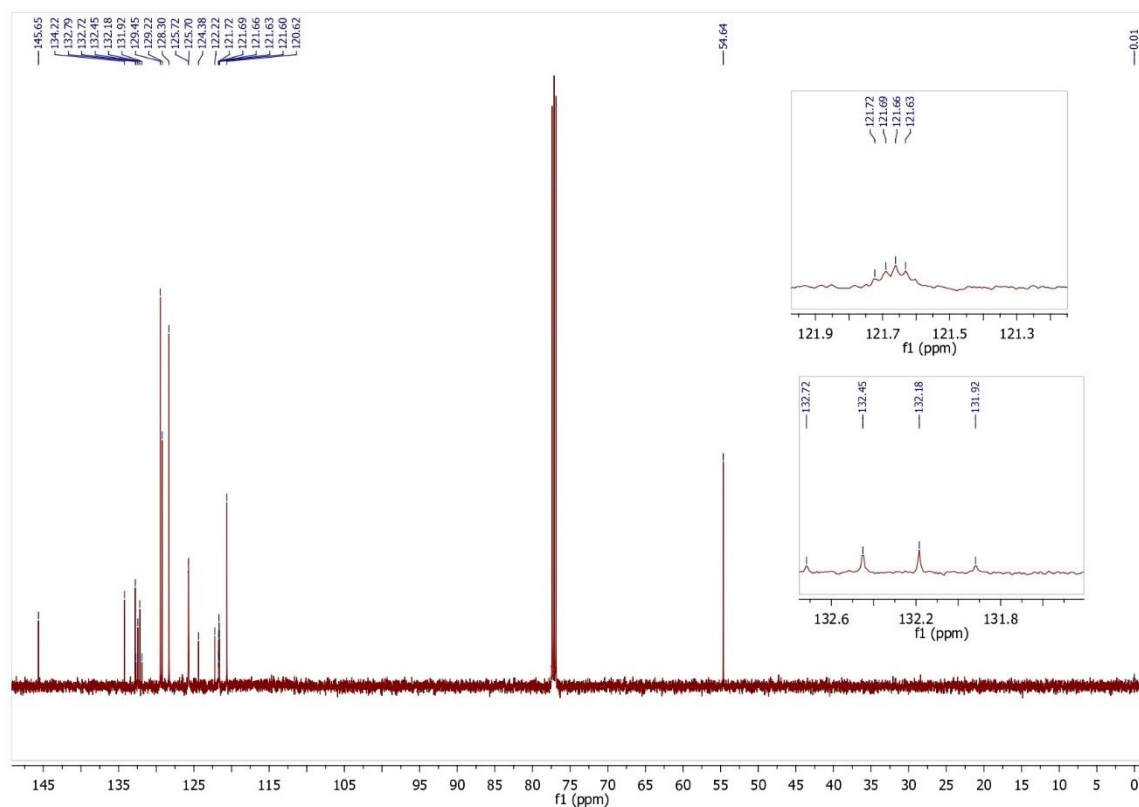



$^1\text{H}$ -NMR spectrum of 1-benzyl-4-(p-tolyl)-1H-1,2,3-triazole (3d)

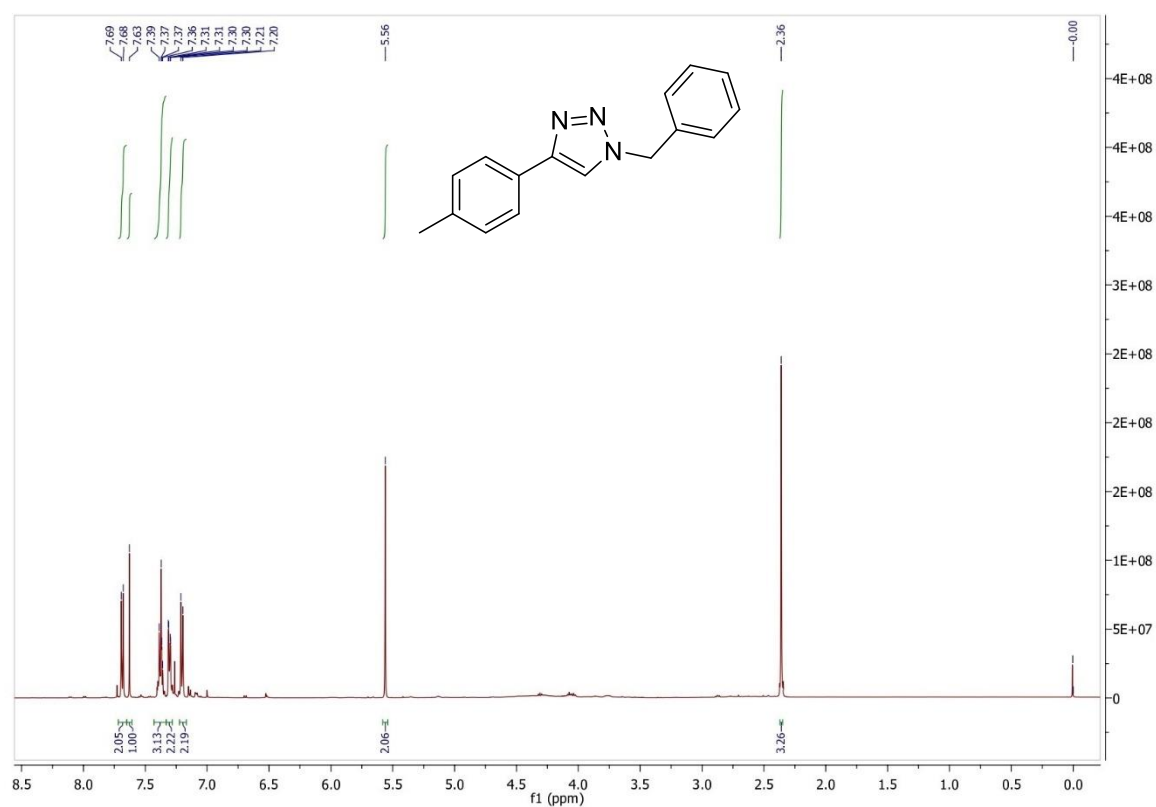

$^{13}\text{C}$ -NMR spectrum of 1-benzyl-4-(p-tolyl)-1H-1,2,3-triazole (3d)

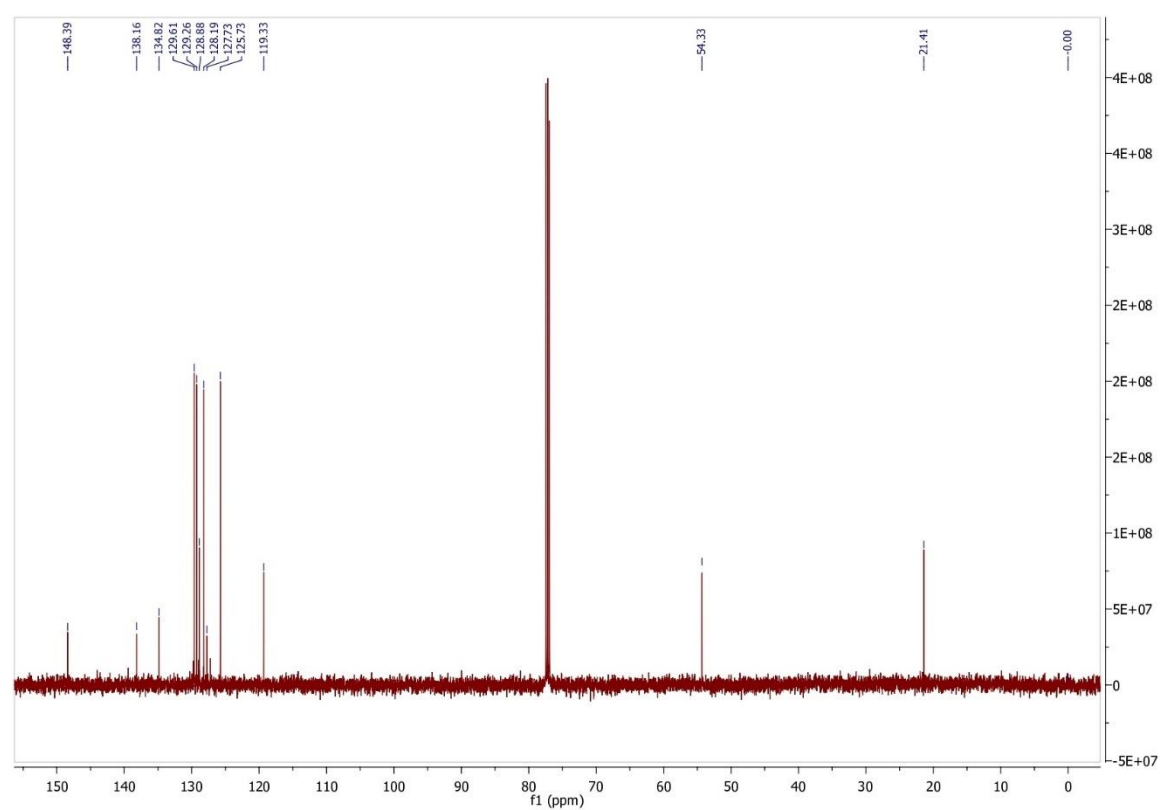

$^1\text{H}$ -NMR spectrum of 1-benzyl-4-(4-methoxyphenyl)-1H-1,2,3-triazole (3e)

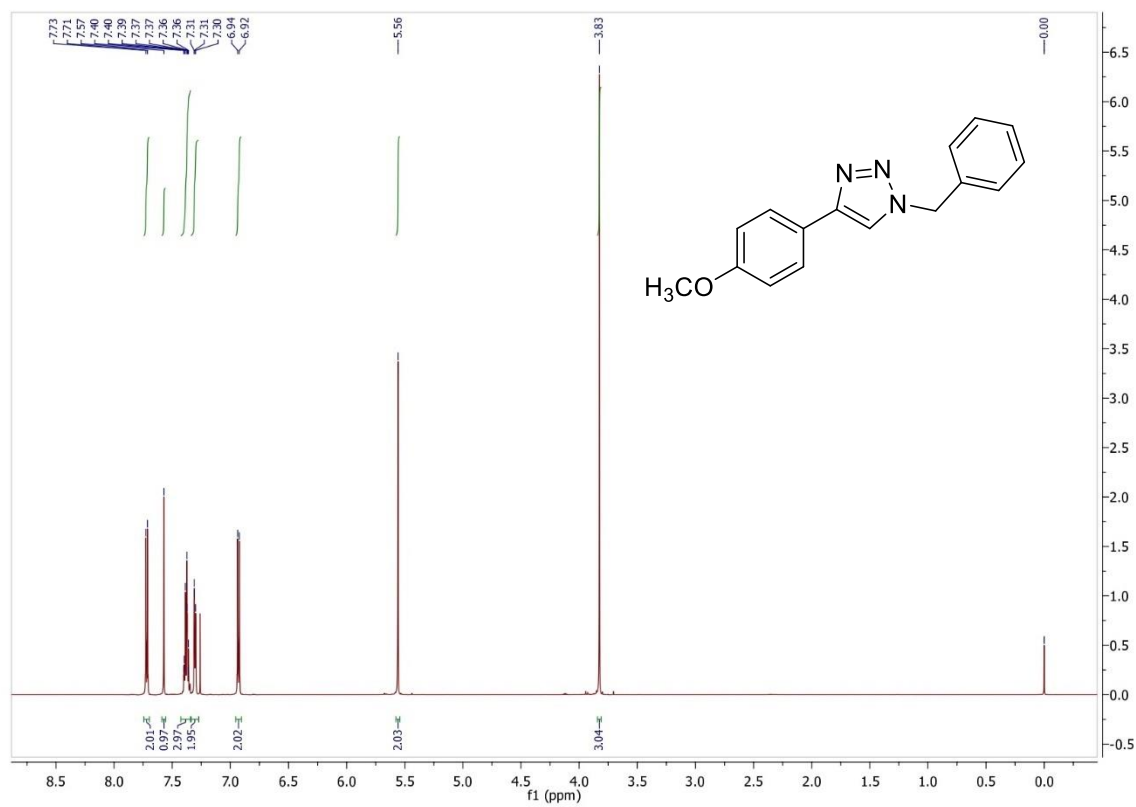

$^{13}\text{C}$ -NMR spectrum of 1-benzyl-4-(4-methoxyphenyl)-1H-1,2,3-triazole (3e)

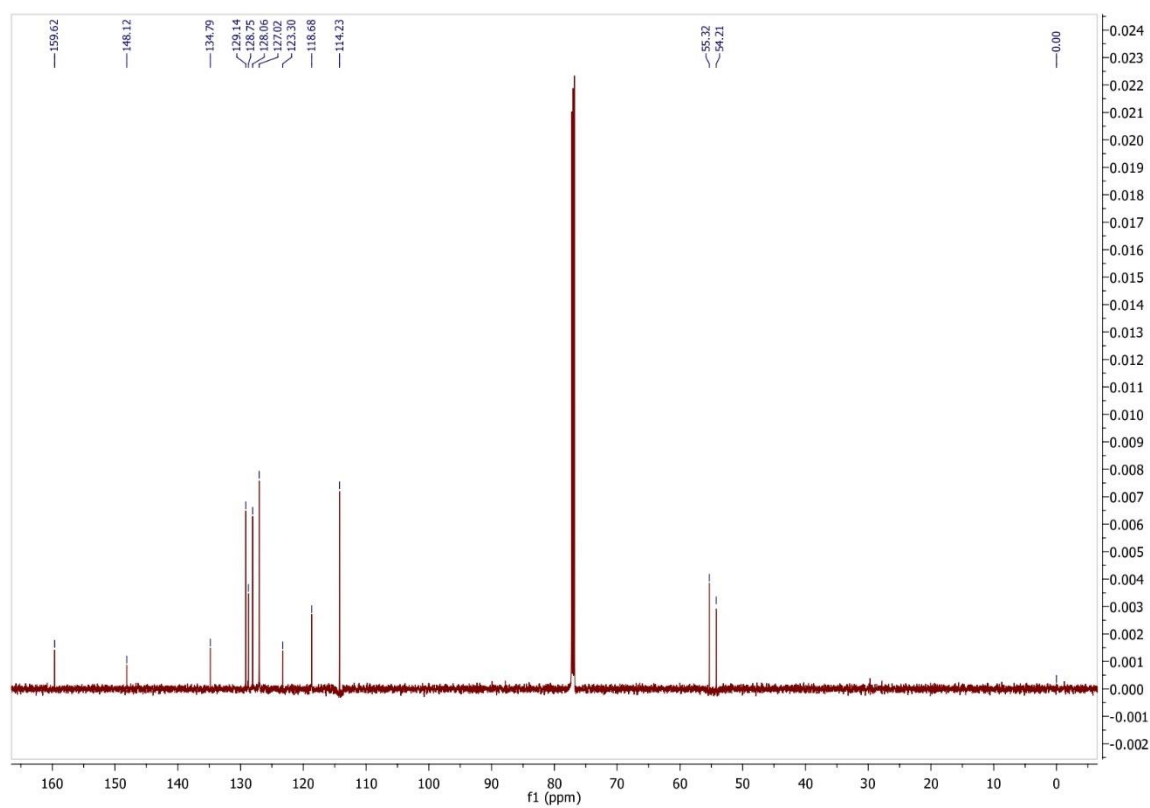

$^1\text{H}$ -NMR spectrum of 1-(4-bromobenzyl)-4-(p-tolyl)-1H-1,2,3-triazole (3f)

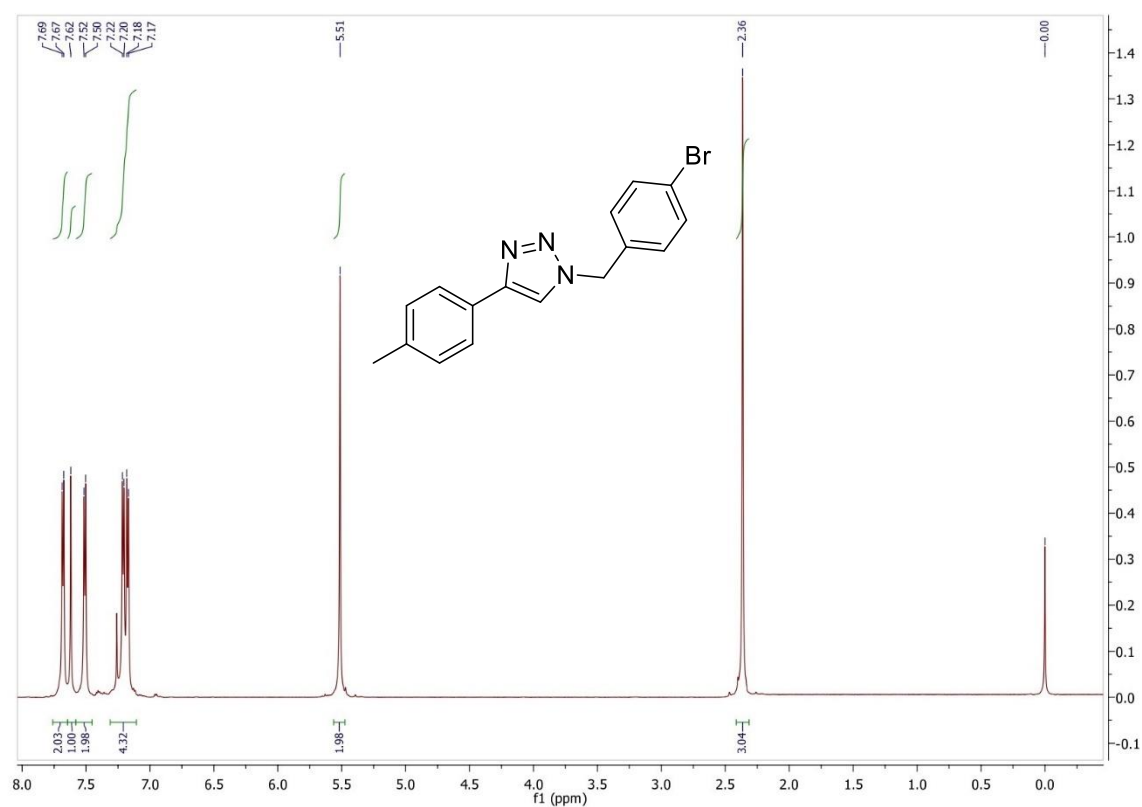

$^{13}\text{C}$ -NMR spectrum of 1-(4-bromobenzyl)-4-(p-tolyl)-1H-1,2,3-triazole (3f)

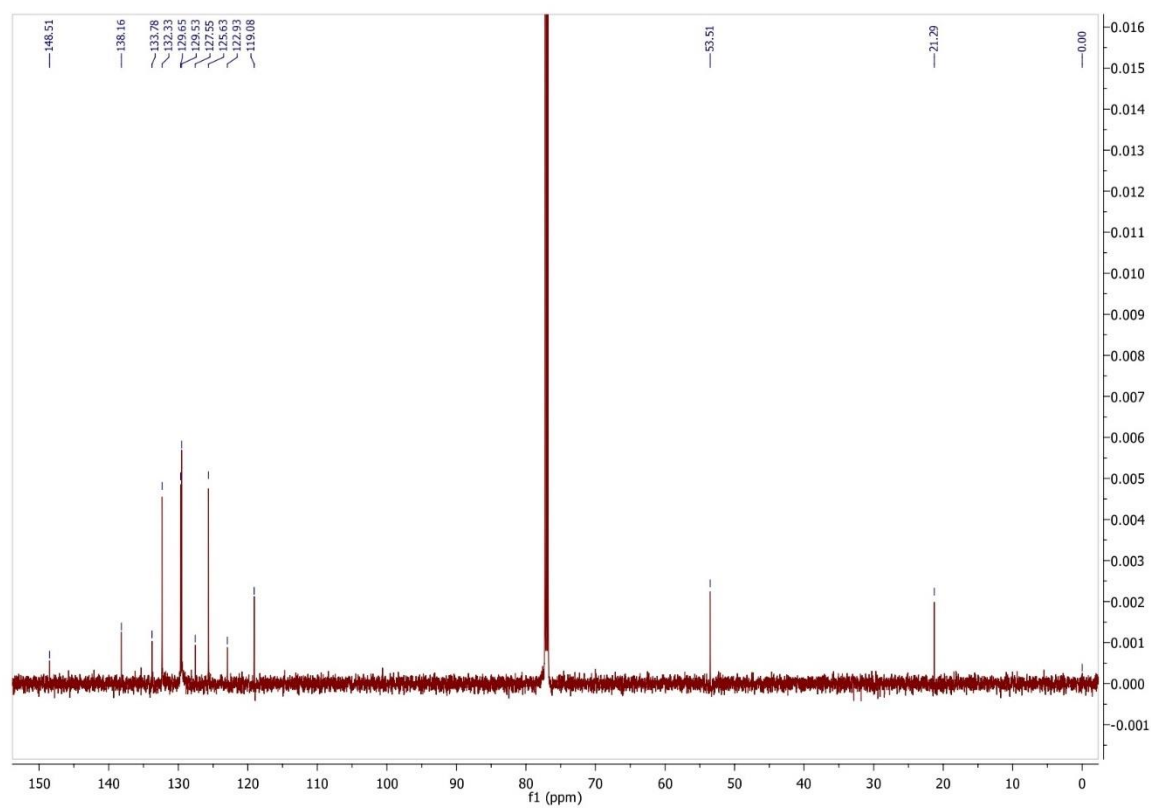

$^1\text{H}$ -NMR spectrum of 1-(4-bromobenzyl)-4-phenyl-1H-1,2,3-triazole (3g)

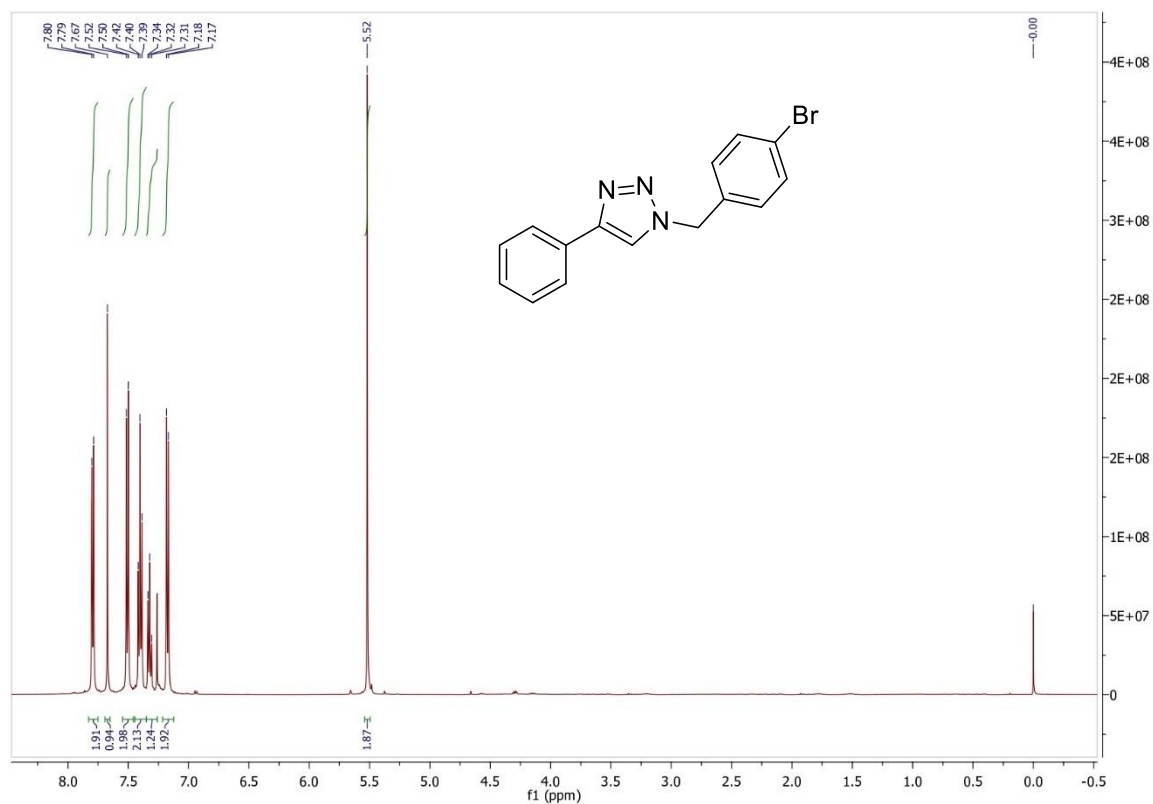

$^{13}\text{C}$ -NMR spectrum of 1-(4-bromobenzyl)-4-phenyl-1H-1,2,3-triazole (3g)

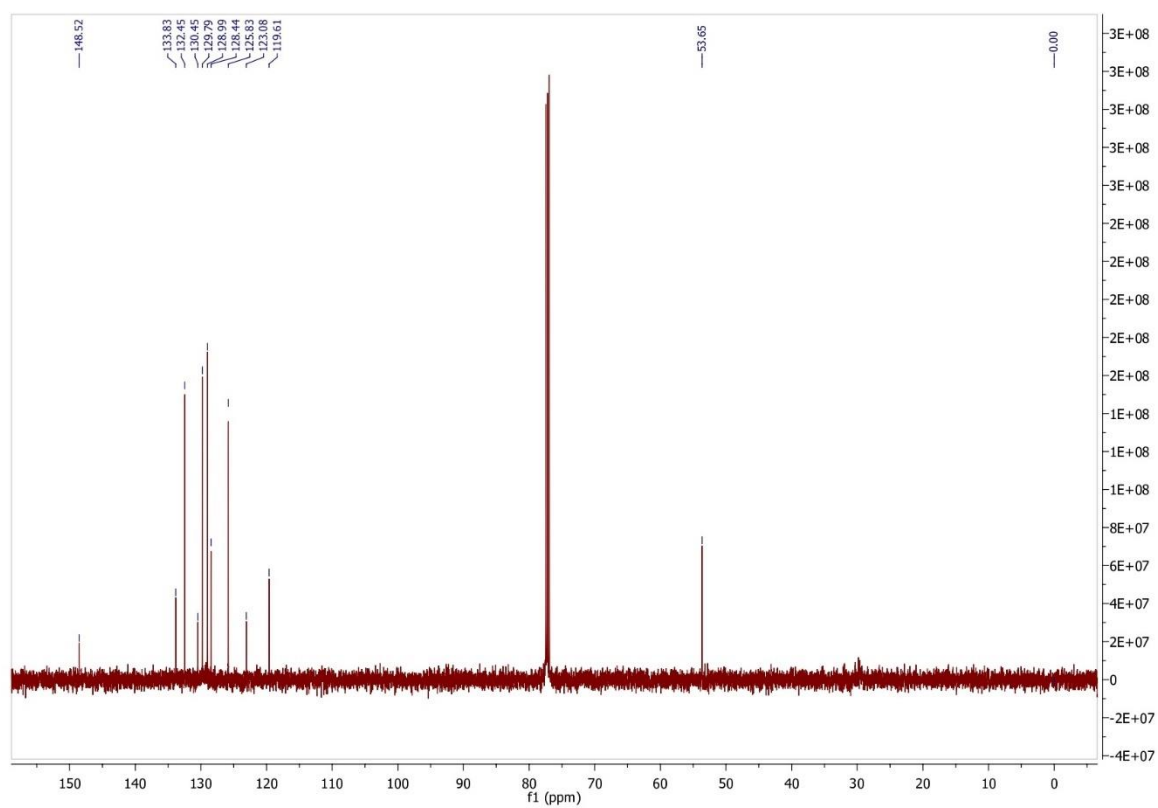

$^1\text{H}$ -NMR spectrum of 1-(4-bromobenzyl)-4-(4-fluorophenyl)-1H-1,2,3-triazole (3h)

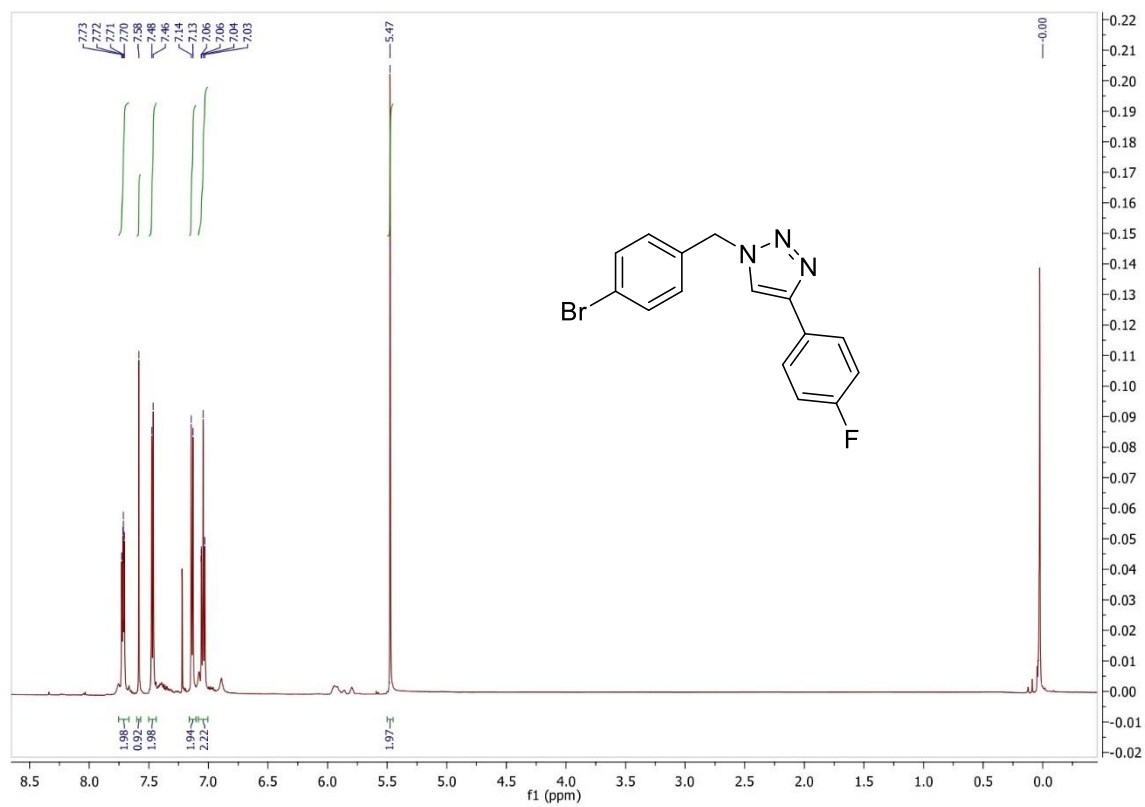

$^{13}\text{C}$ -NMR spectrum of 1-(4-bromobenzyl)-4-(4-fluorophenyl)-1H-1,2,3-triazole (3h)

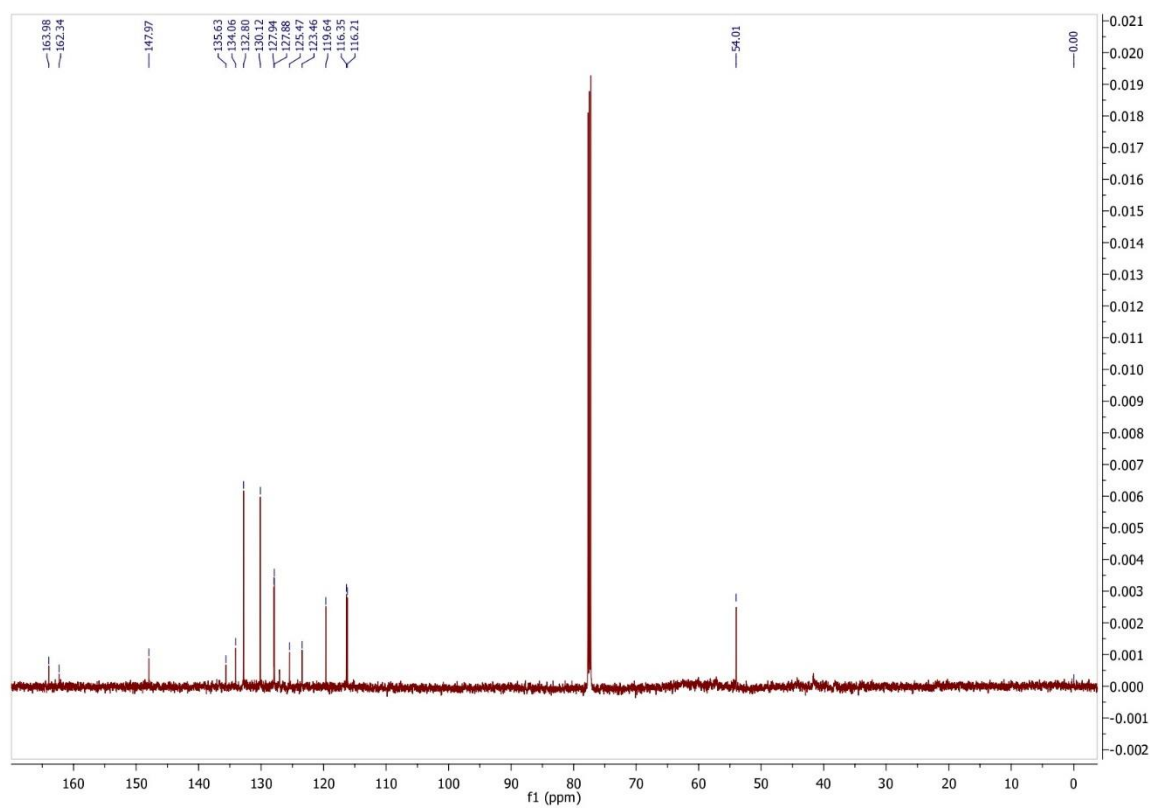

$^1\text{H}$ -NMR spectrum of 1-(4-chlorobenzyl)-4-phenyl-1H-1,2,3-triazole (3i)

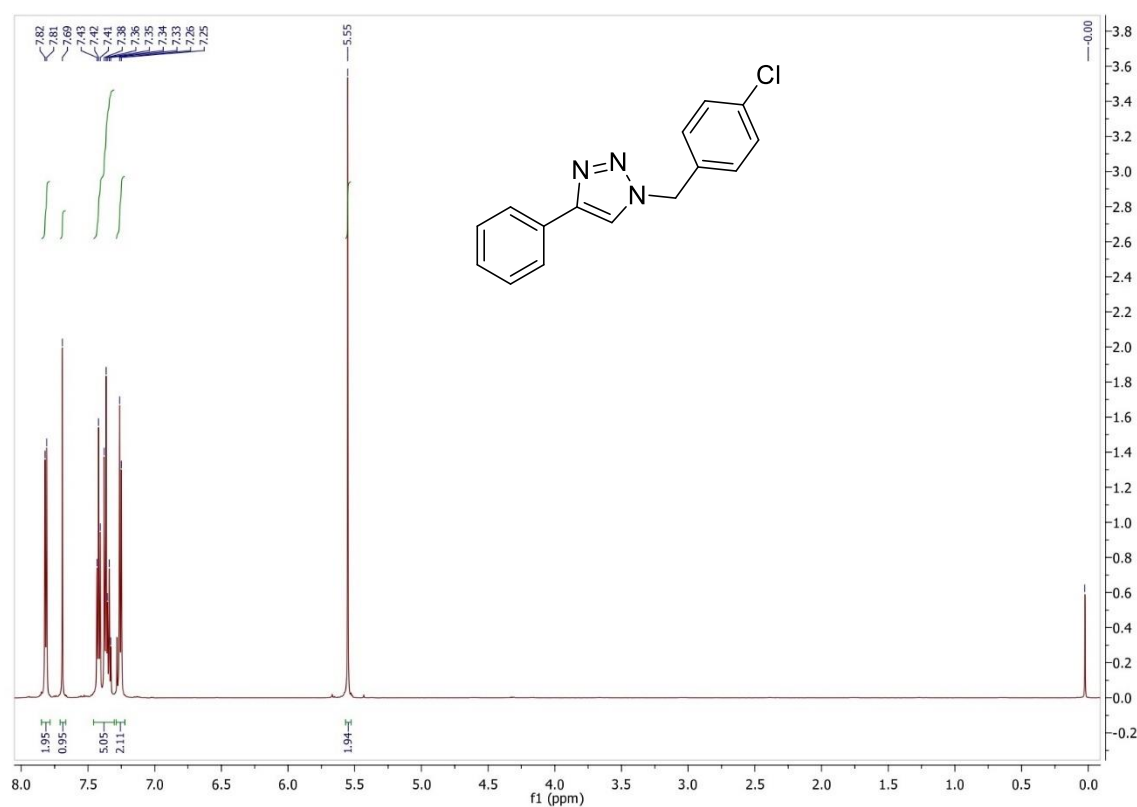

$^{13}\text{C}$ -NMR spectrum of 1-(4-chlorobenzyl)-4-phenyl-1H-1,2,3-triazole (3i)

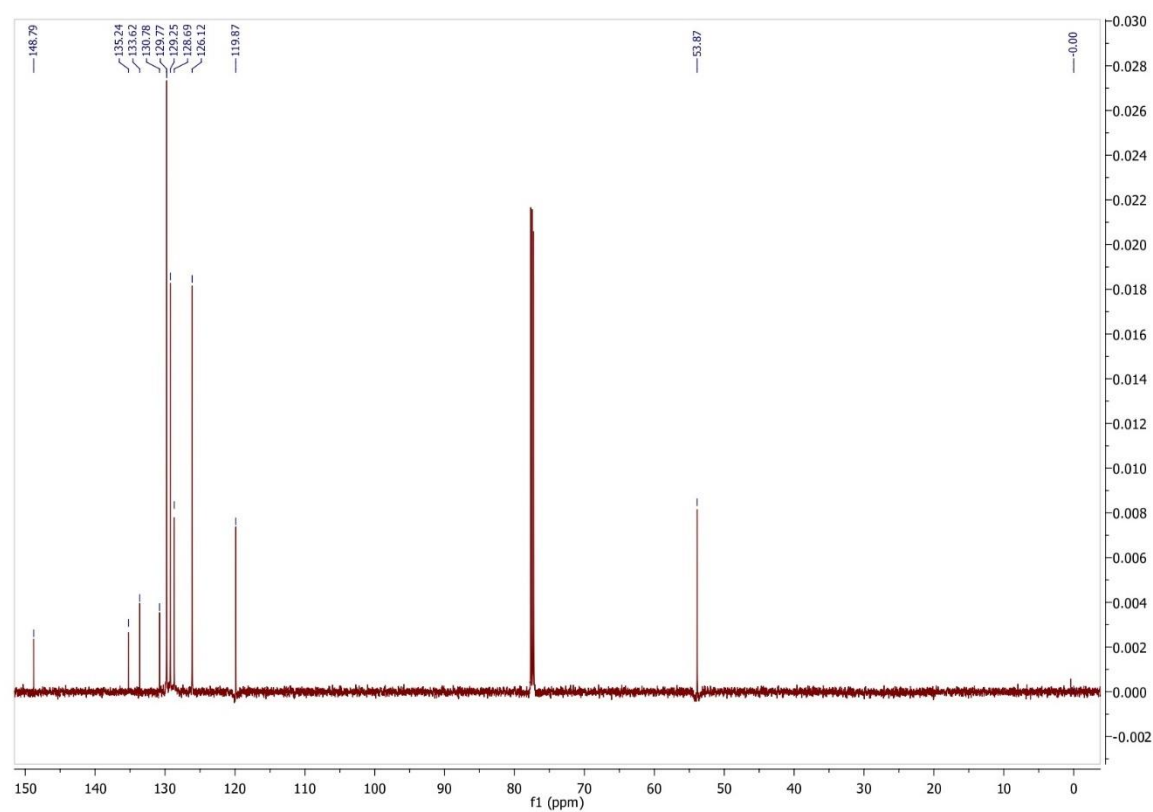

$^1\text{H}$ -NMR spectrum of 1-(4-chlorobenzyl)-4-(p-tolyl)-1H-1,2,3-triazole (3j)

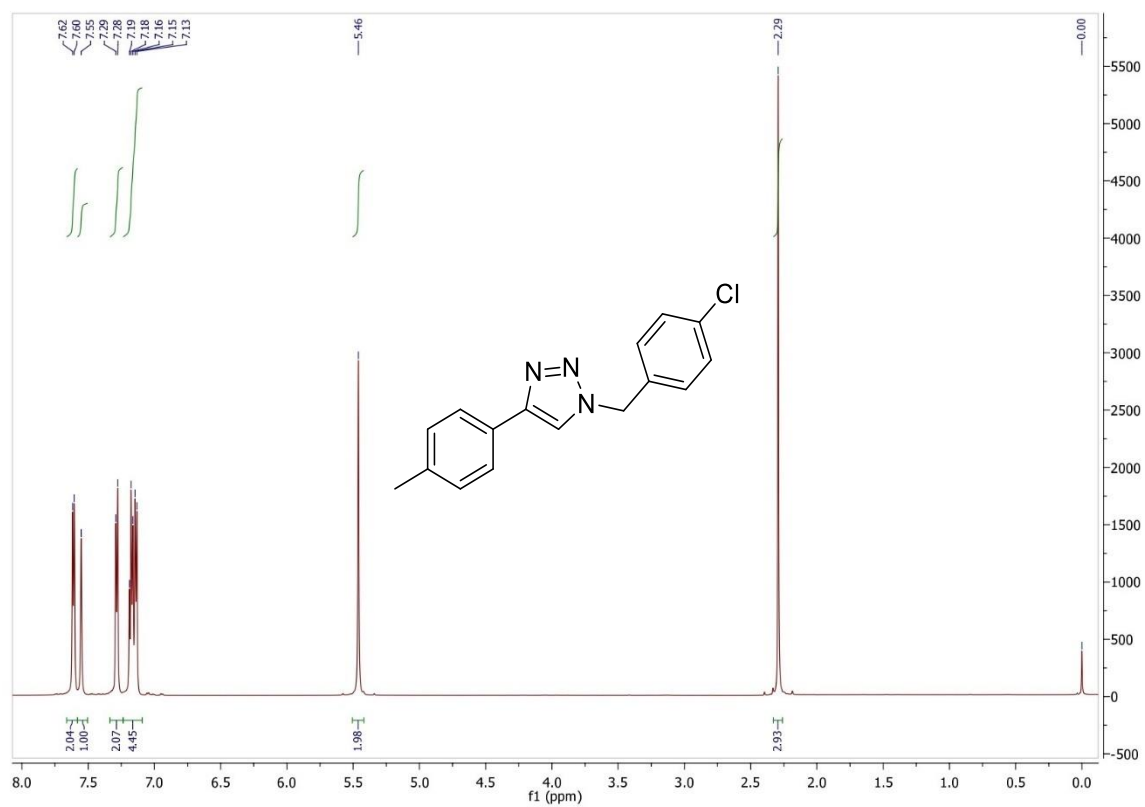

$^{13}\text{C}$ -NMR spectrum of 1-(4-chlorobenzyl)-4-(p-tolyl)-1H-1,2,3-triazole (3j)

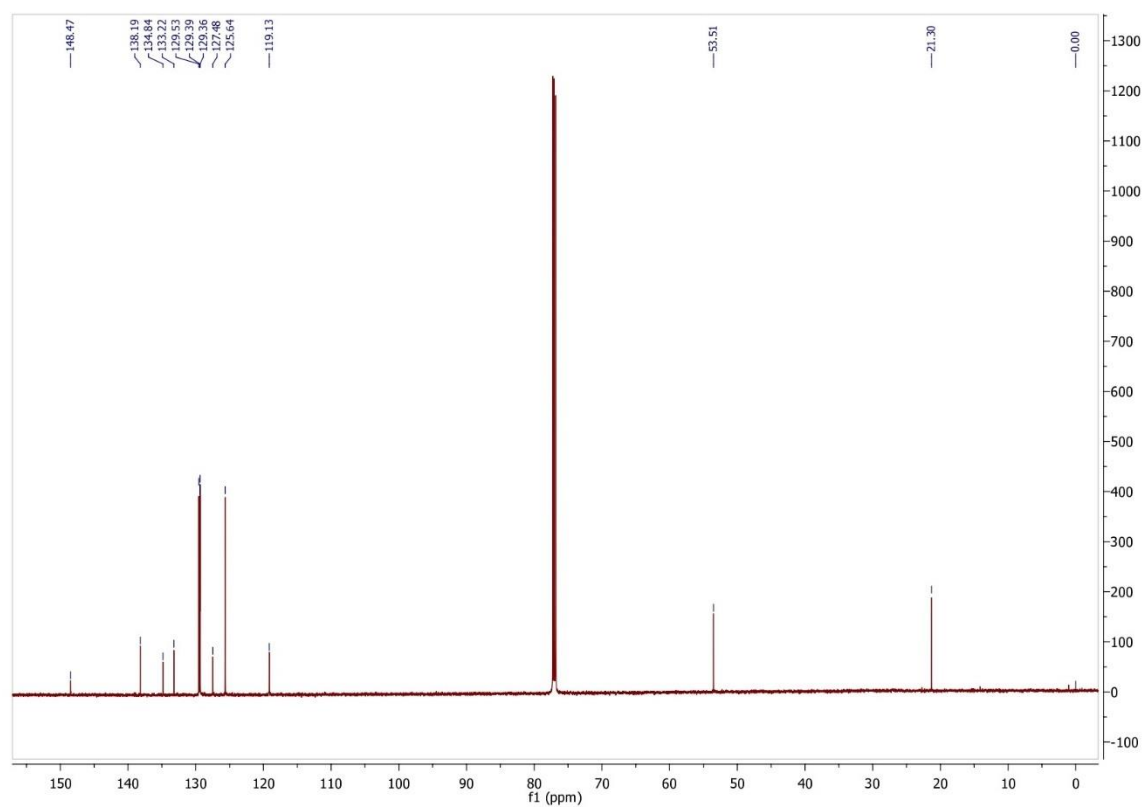

$^1\text{H}$ -NMR spectrum of 1-(4-chlorobenzyl)-4-(4-methoxyphenyl)-1H-1,2,3-triazole (3k)

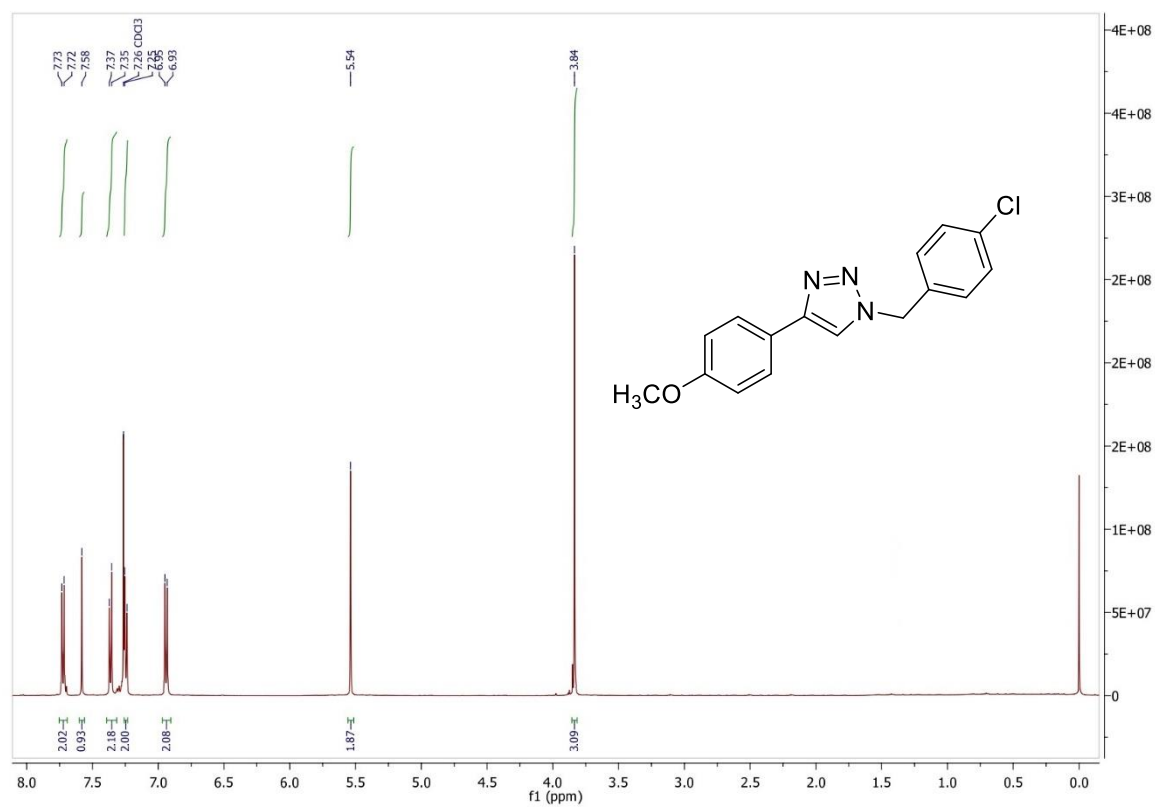



$^1\text{H}$ -NMR spectrum of 1-(4-chlorobenzyl)-4-(4-fluorophenyl)-1H-1,2,3-triazole (31)

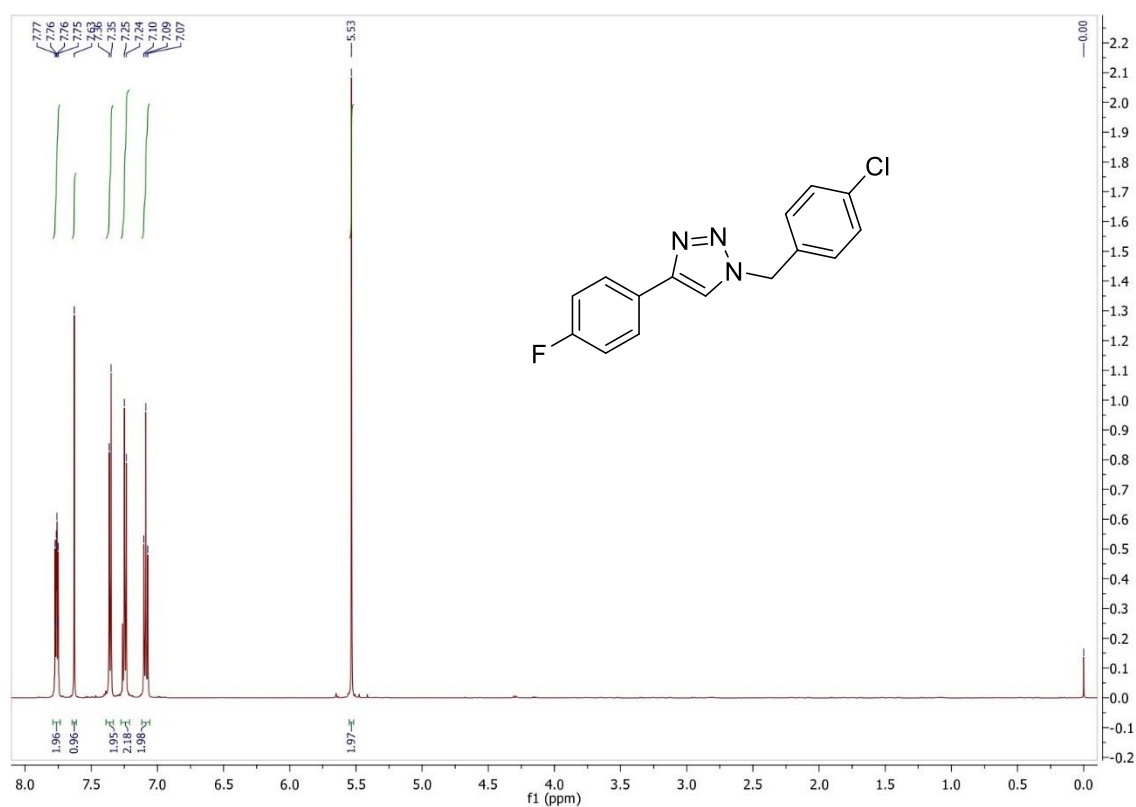

$^{13}\text{C}$ -NMR spectrum of 1-(4-chlorobenzyl)-4-(4-fluorophenyl)-1H-1,2,3-triazole (31)

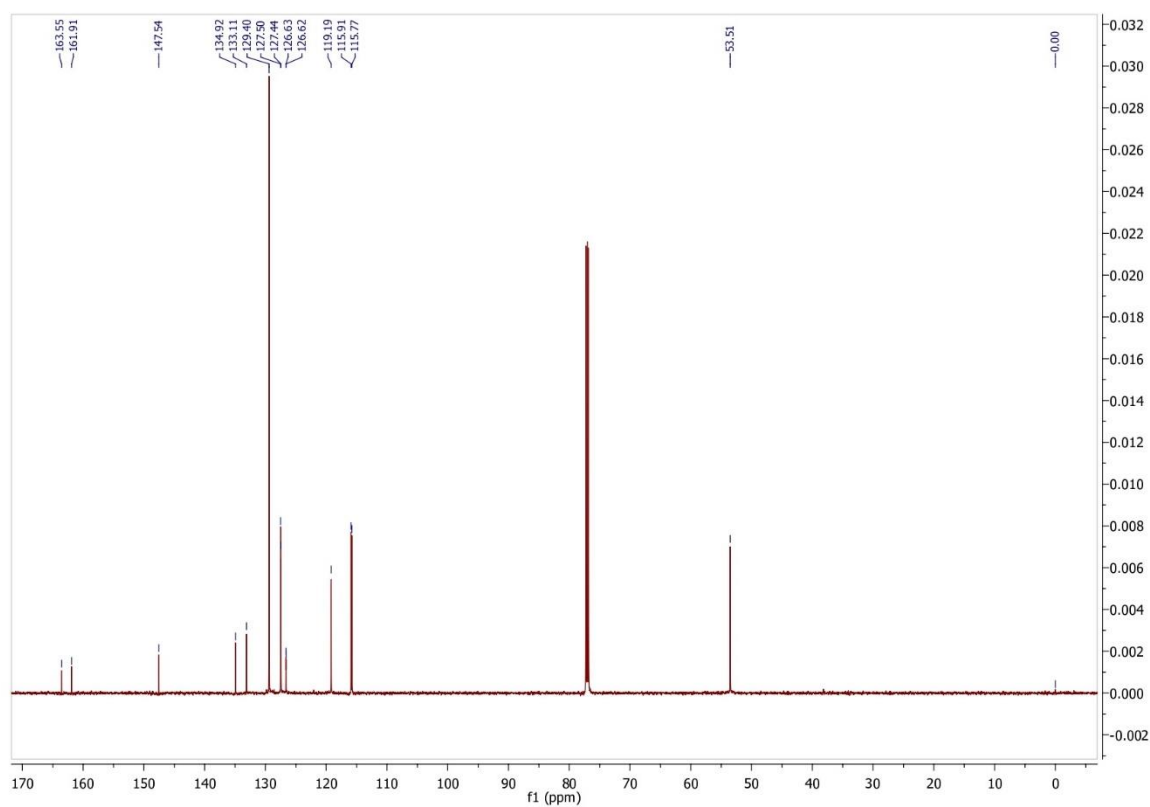

$^1\text{H}$ -NMR spectrum of 4-(4-fluorophenyl)-1-(4-(trifluoromethyl)benzyl)-1H-1,2,3-triazole (3m)

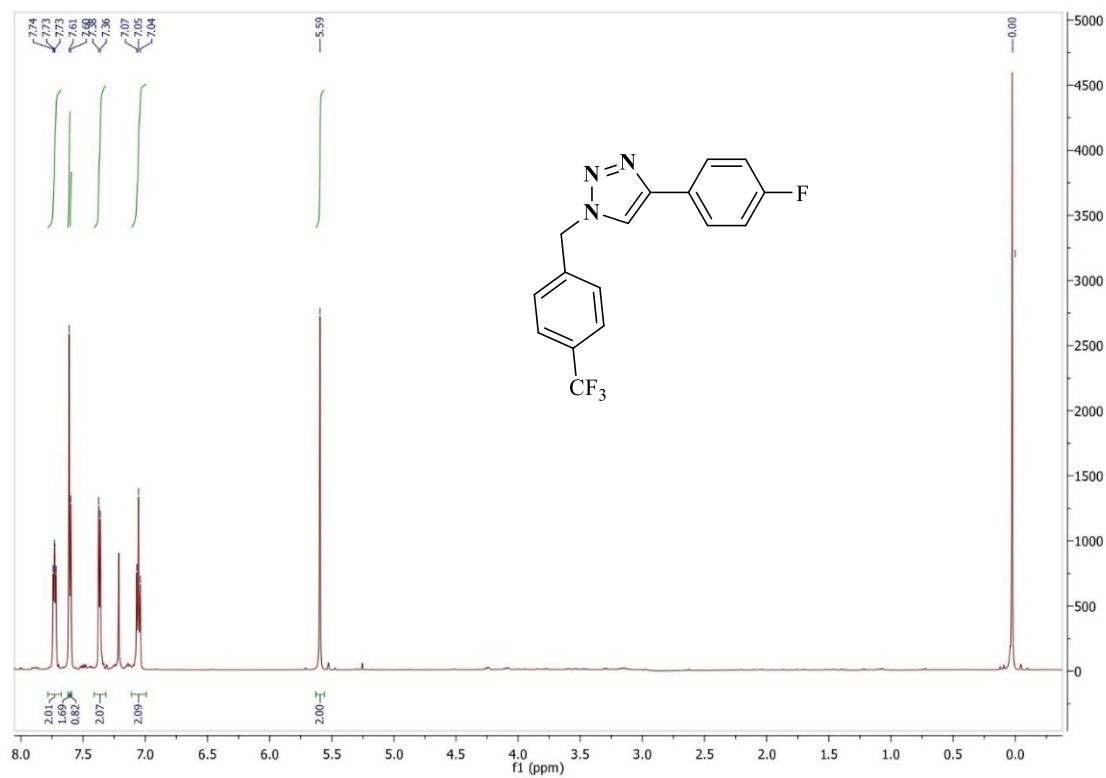

$^{13}\text{C}$ -NMR spectrum of 4-(4-fluorophenyl)-1-(4-(trifluoromethyl)benzyl)-1H-1,2,3-triazole (3m)

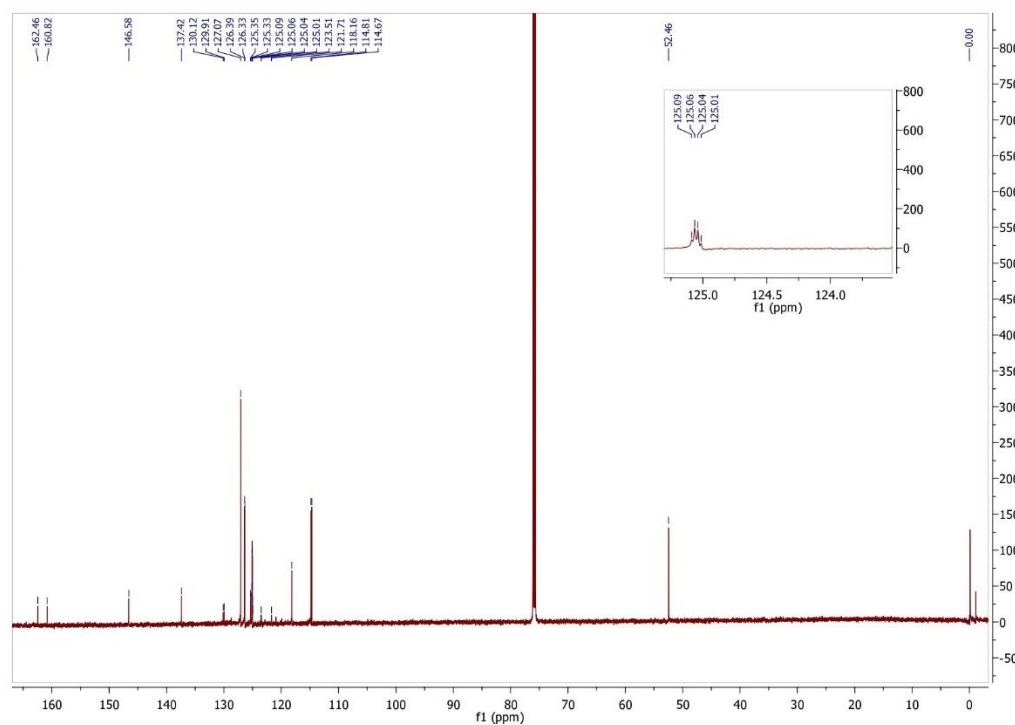

$^1\text{H}$ -NMR spectrum of 4-(p-tolyl)-1-(4-(trifluoromethyl)benzyl)-1H-1,2,3-triazole (3n)

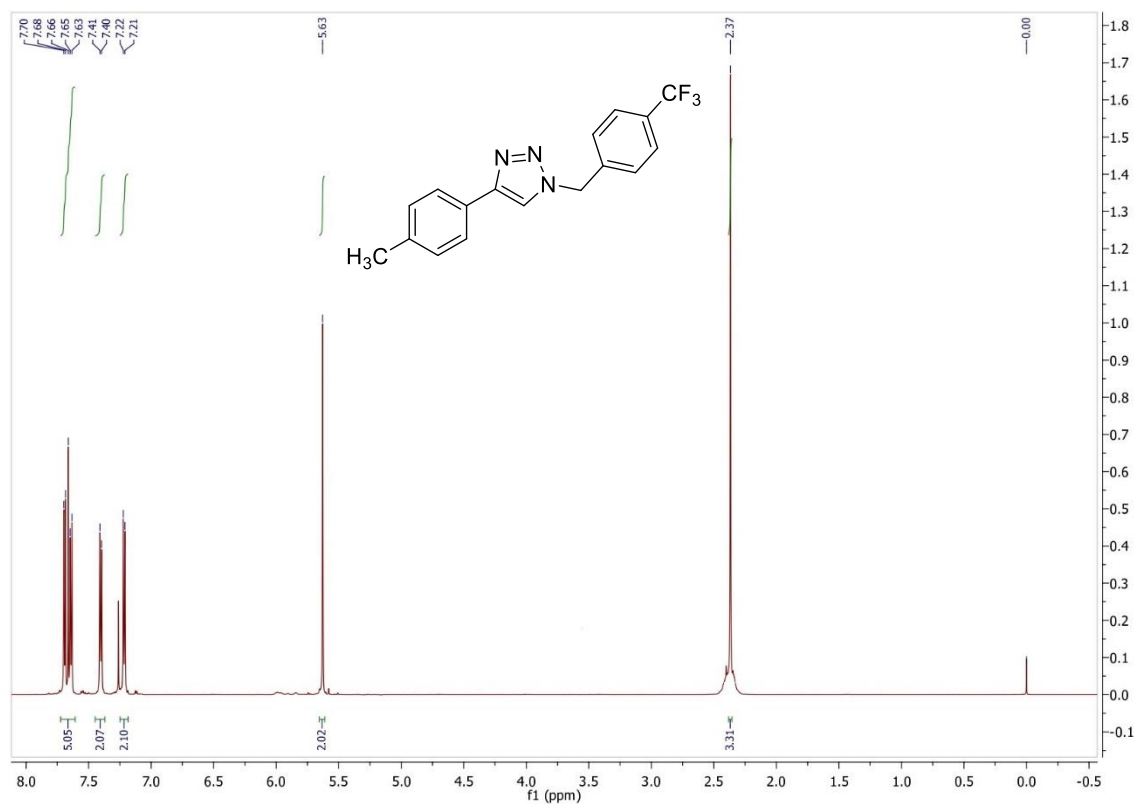

$^{13}\text{C}$ -NMR spectrum of 4-(p-tolyl)-1-(4-(trifluoromethyl)benzyl)-1H-1,2,3-triazole (3n)

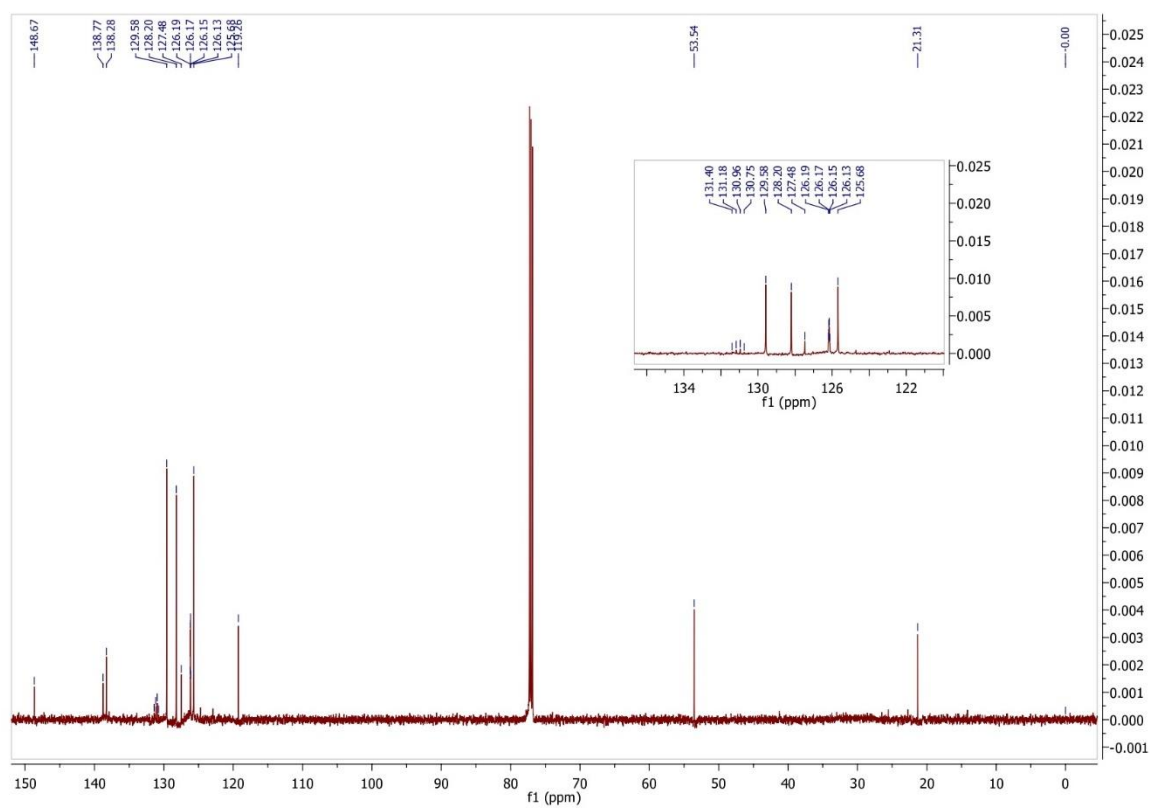

$^1\text{H}$ -NMR spectrum of 4-phenyl-1-(4-(trifluoromethyl)benzyl)-1H-1,2,3-triazole (3o)

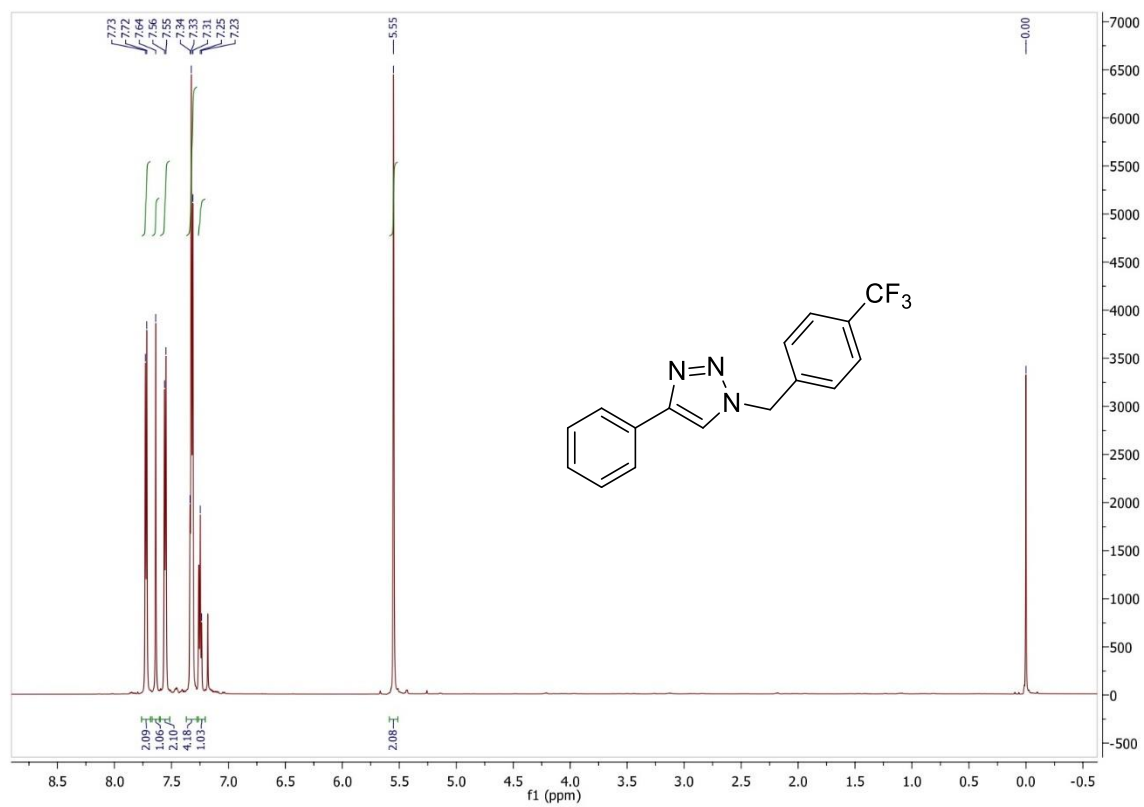

$^{13}\text{C}$ -NMR spectrum of 4-phenyl-1-(4-(trifluoromethyl)benzyl)-1H-1,2,3-triazole (3o)

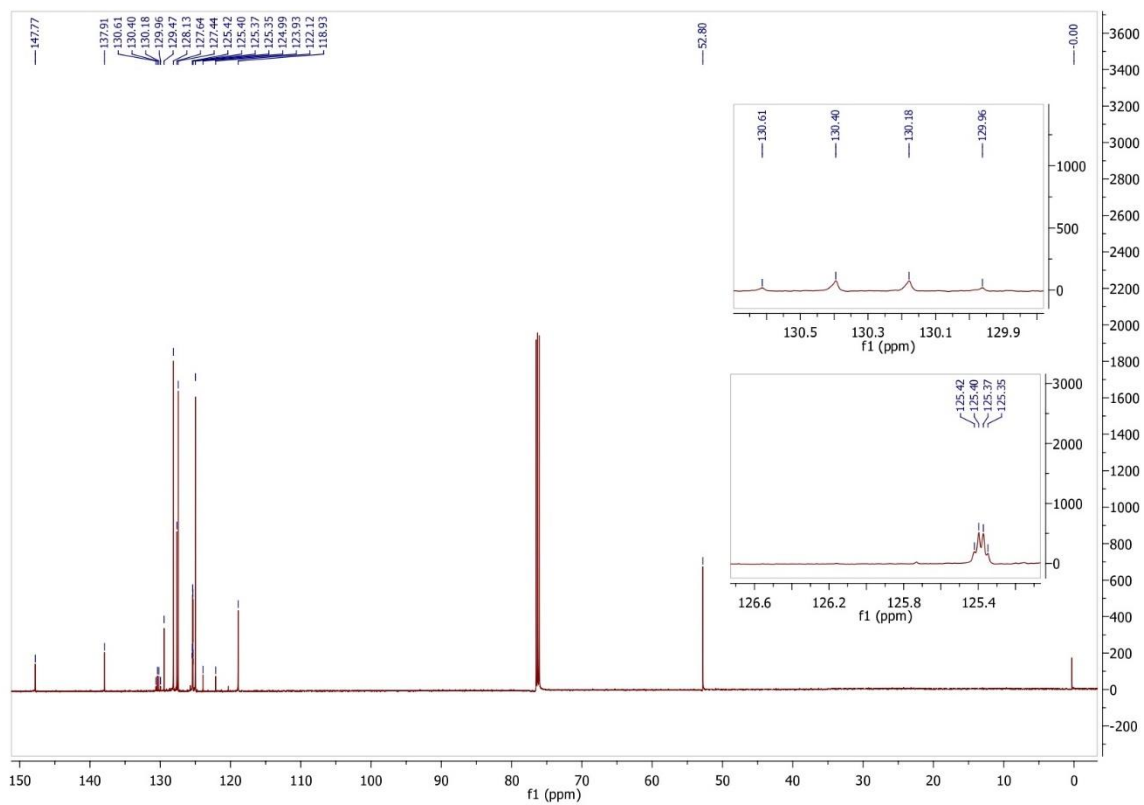

$^1\text{H}$ -NMR spectrum of 1-(3,5-bis((3,5-dimethoxybenzyl)oxy)benzyl)-4-phenyl-1H-1,2,3-triazole (3p)

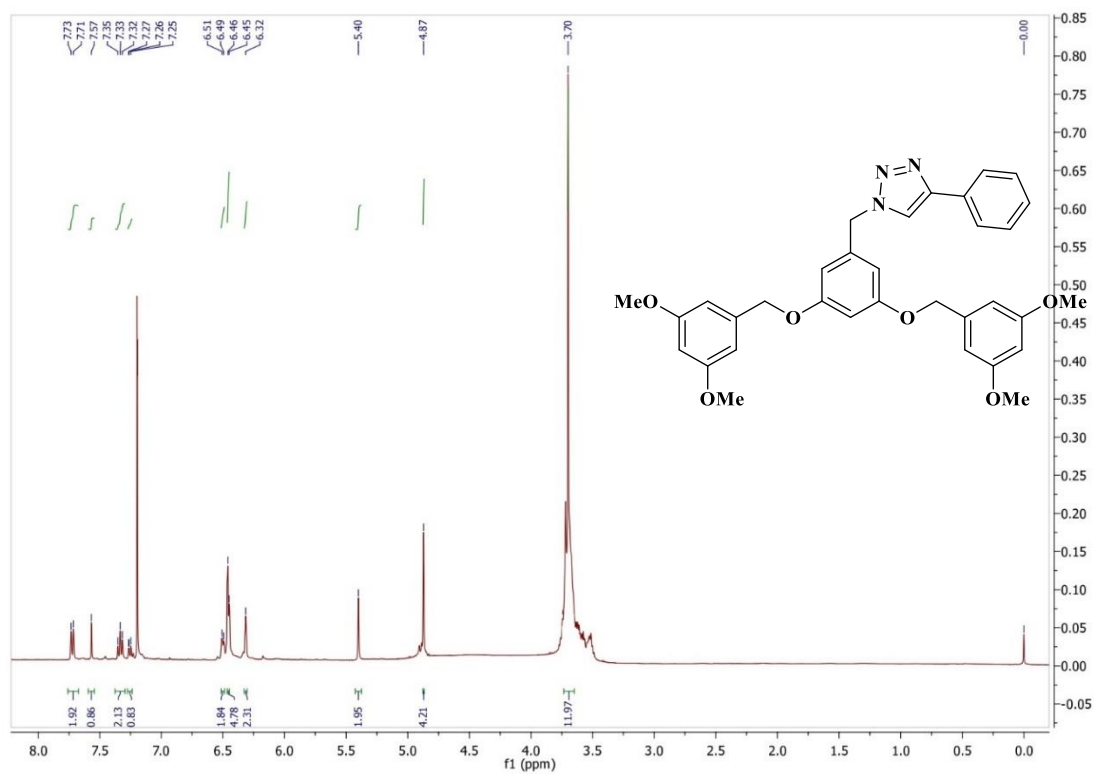

$^{13}\text{C}$ -NMR spectrum of 1-(3,5-bis((3,5-dimethoxybenzyl)oxy)benzyl)-4-phenyl-1H-1,2,3-triazole (3p)

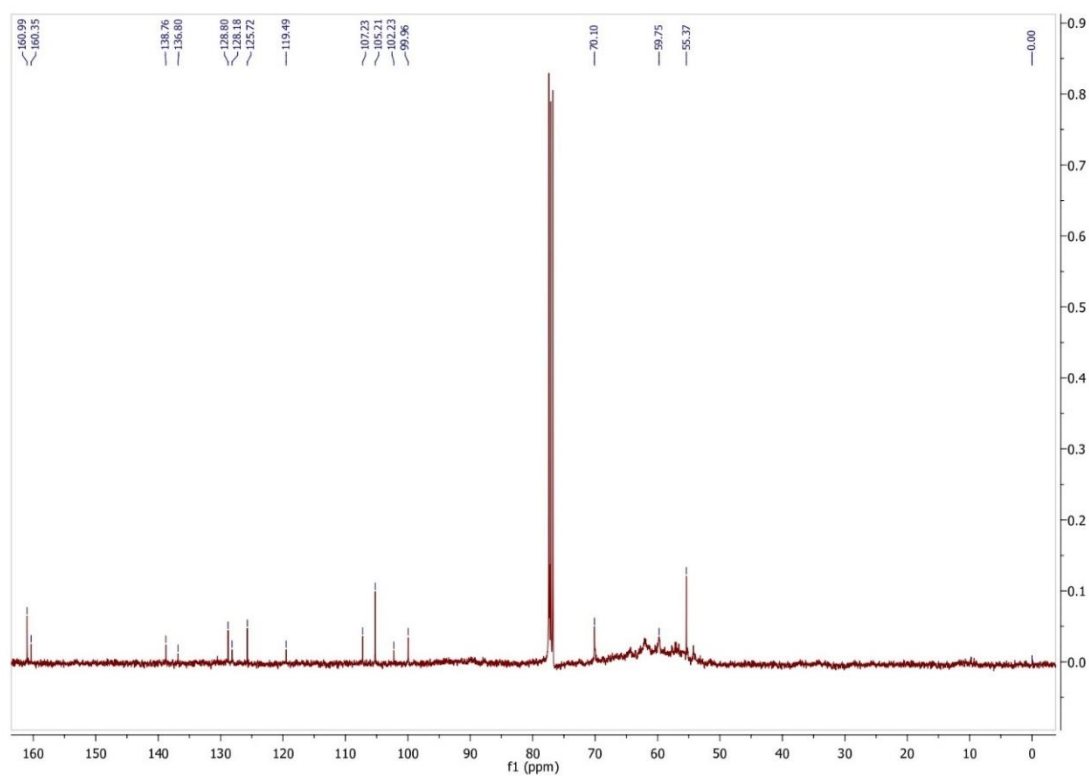

$^1\text{H}$ -NMR spectrum of (1-benzyl-1H-1,2,3-triazol-4-yl)methyl benzoate (3q)

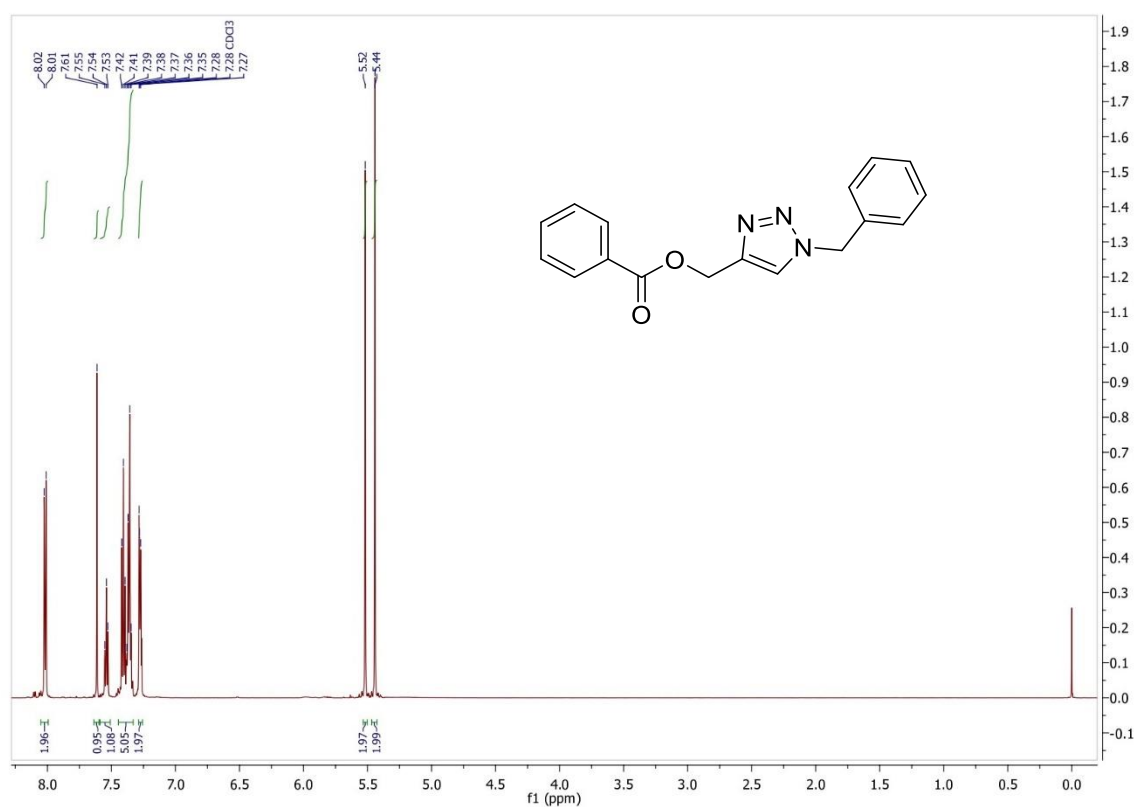

$^{13}\text{C}$ -NMR spectrum of (1-benzyl-1H-1,2,3-triazol-4-yl)methyl benzoate (3q)

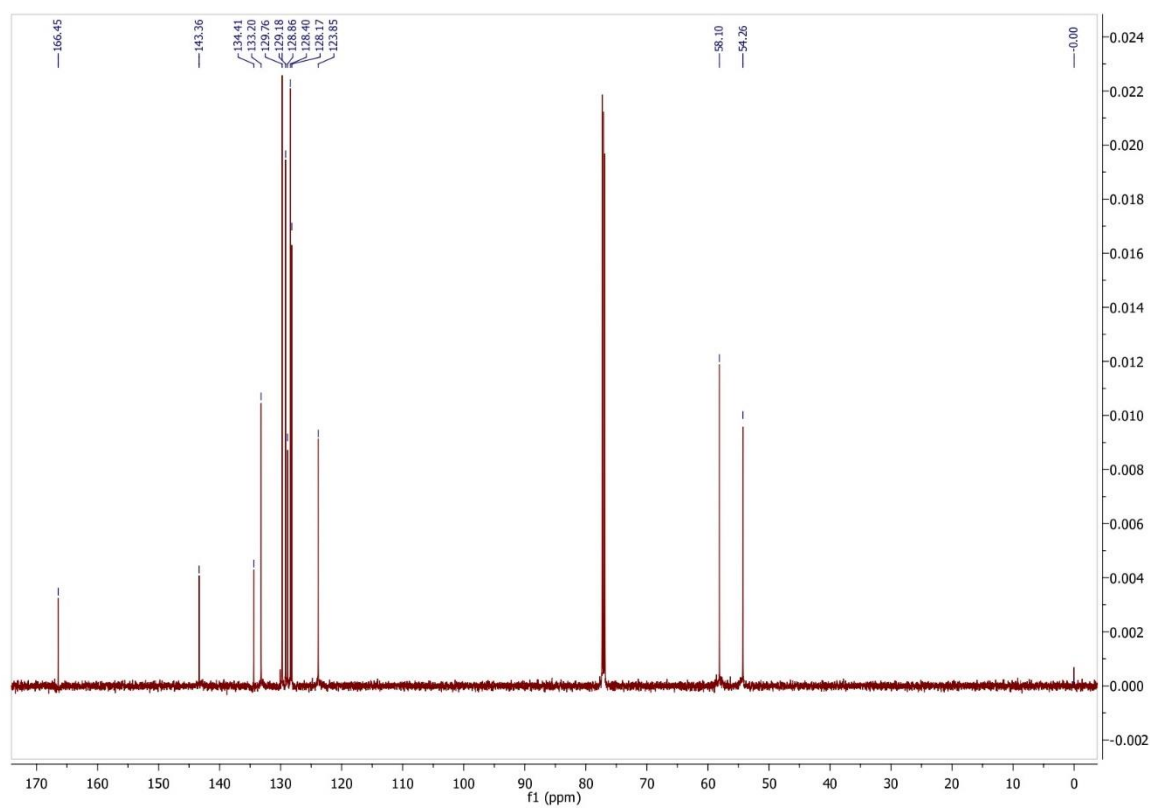

$^1\text{H}$ -NMR spectrum of 1-(4-(tert-butyl)benzyl)-4-(p-tolyl)-1H-1,2,3-triazole (3r)

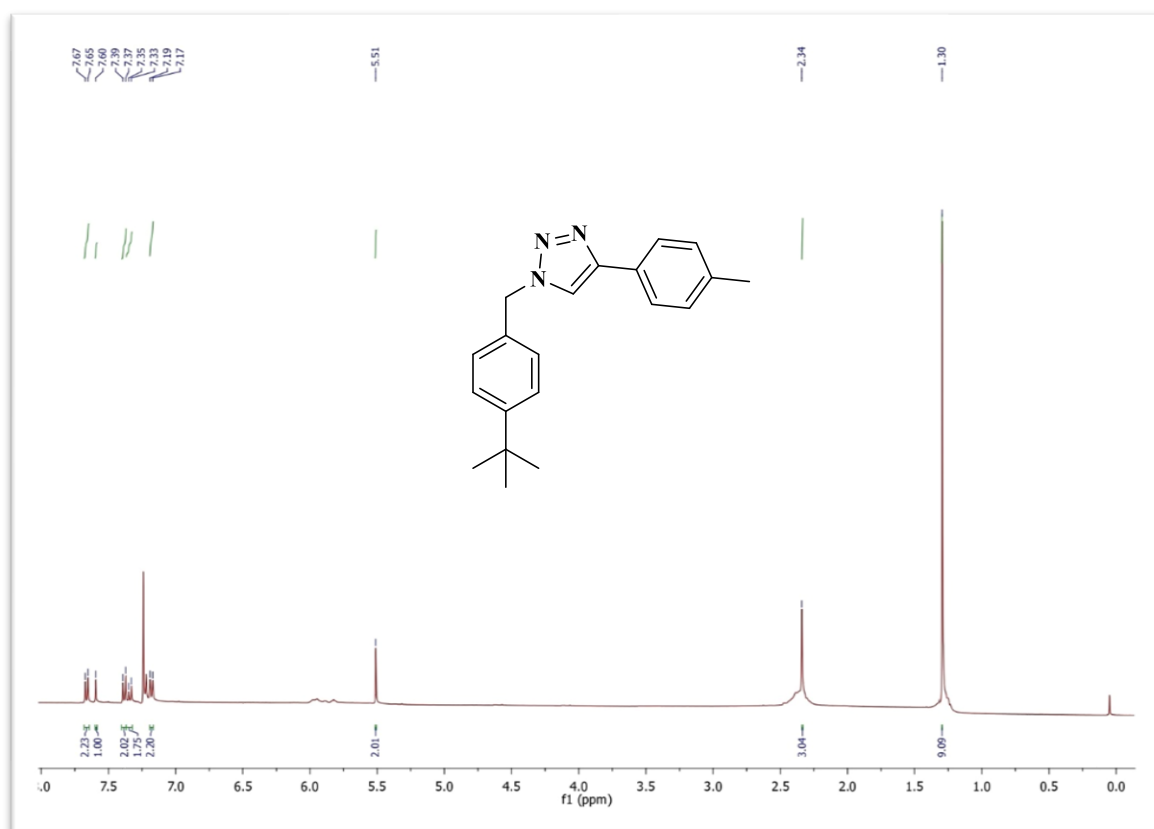

$^{13}\text{C}$ -NMR spectrum of 1-(4-(tert-butyl)benzyl)-4-(p-tolyl)-1H-1,2,3-triazole (3r)

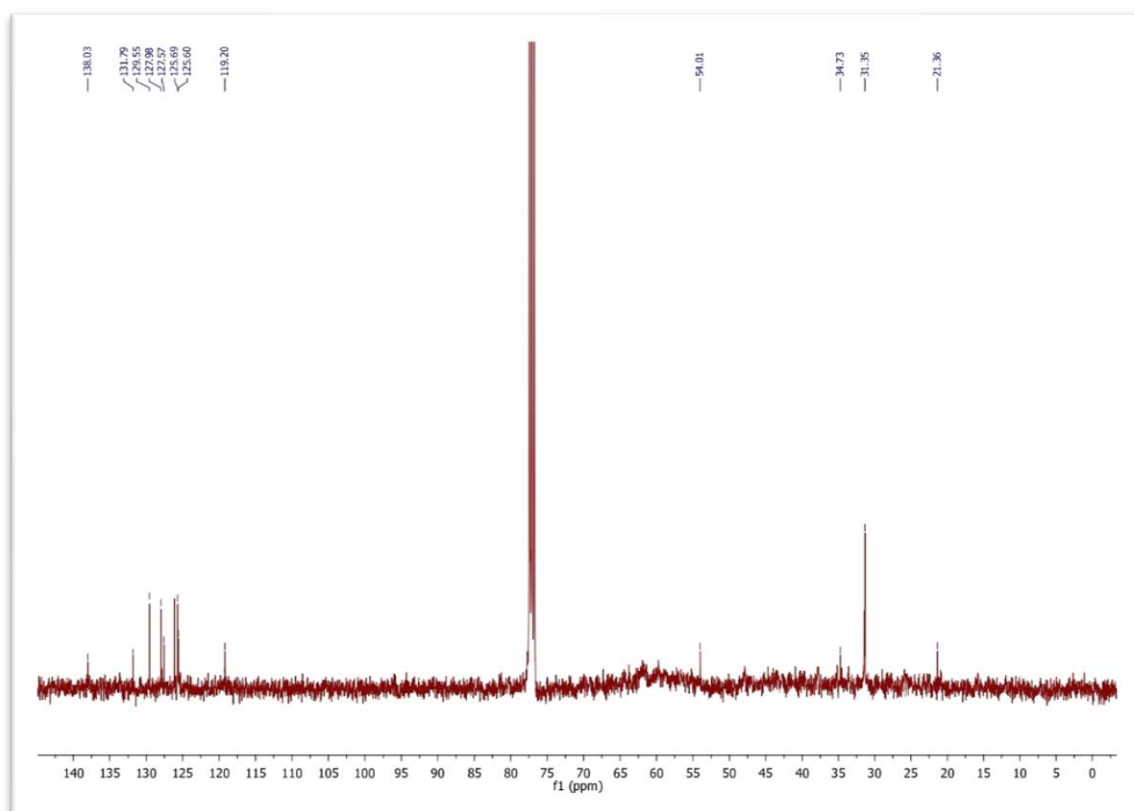

$^1\text{H}$ -NMR spectrum of 1-(3,5-di-tert-butylbenzyl)-4-phenyl-1H-1,2,3-triazole (3s)

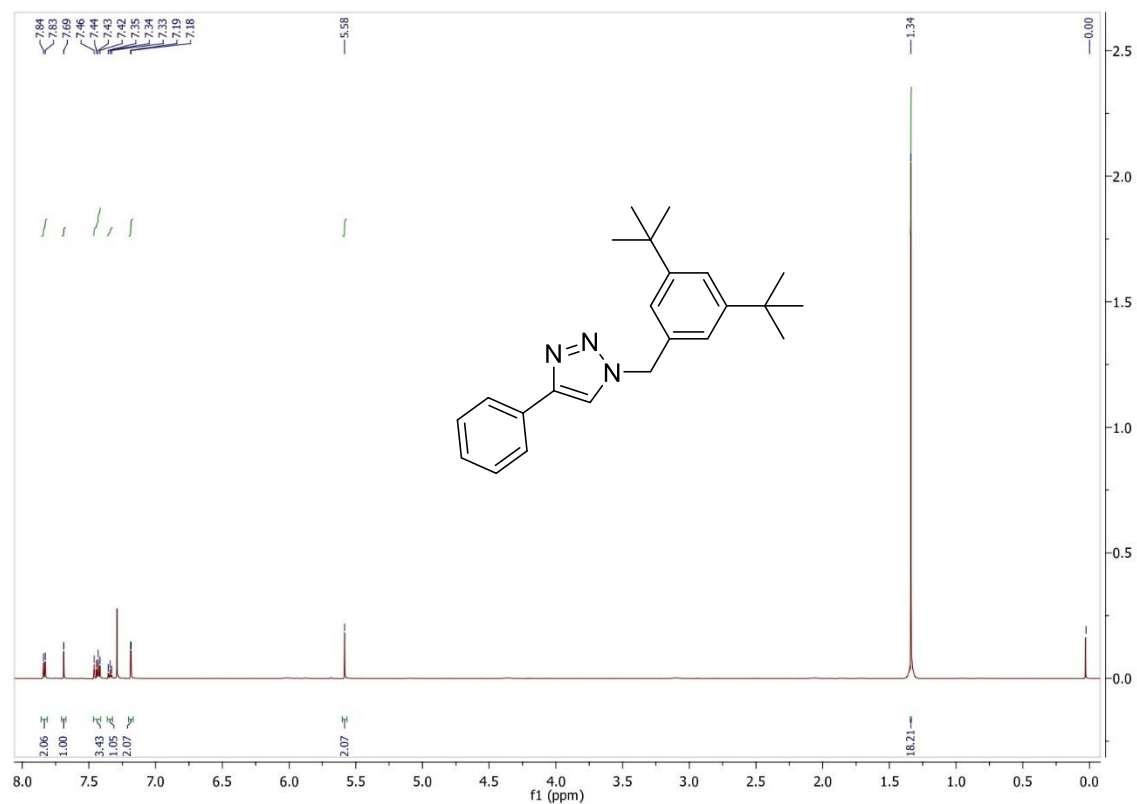

$^{13}\text{C}$ -NMR spectrum of 1-(3,5-di-tert-butylbenzyl)-4-phenyl-1H-1,2,3-triazole (3s)

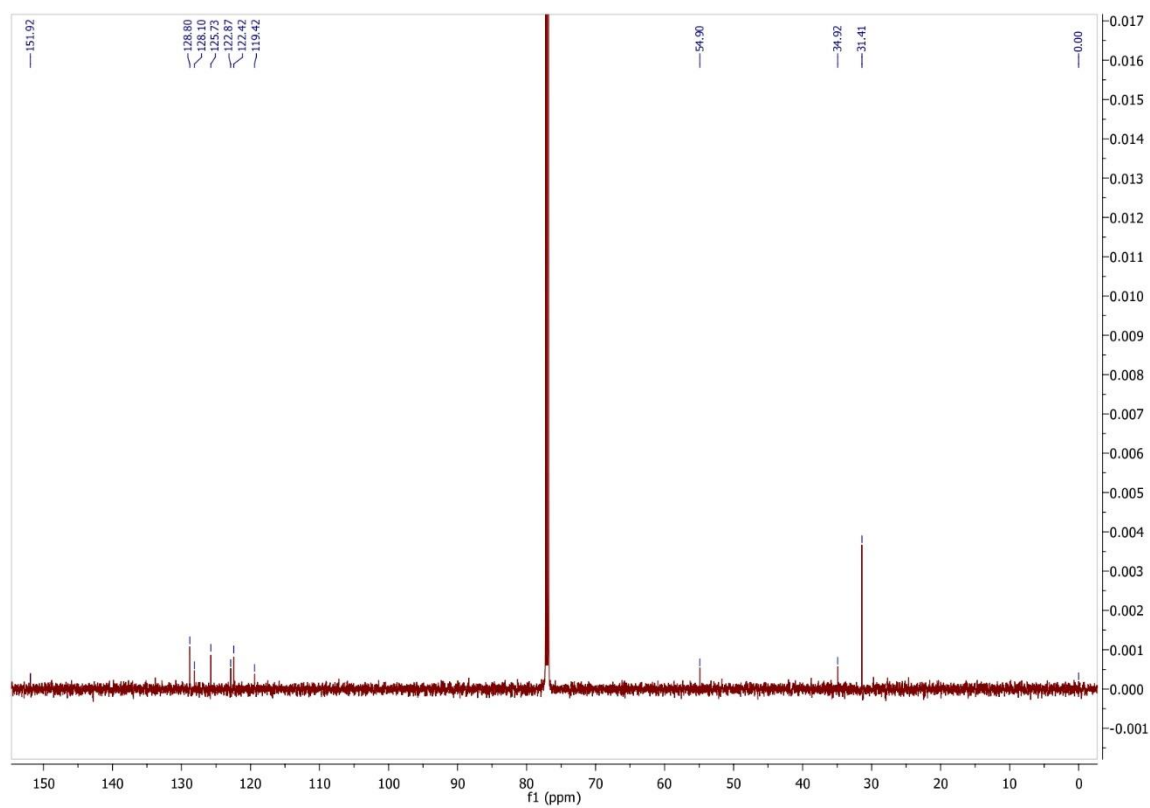



$^1\text{H}$ -NMR spectrum of 1-(3,5-di-tert-butylbenzyl)-4-(p-tolyl)-1H-1,2,3-triazole (3t)

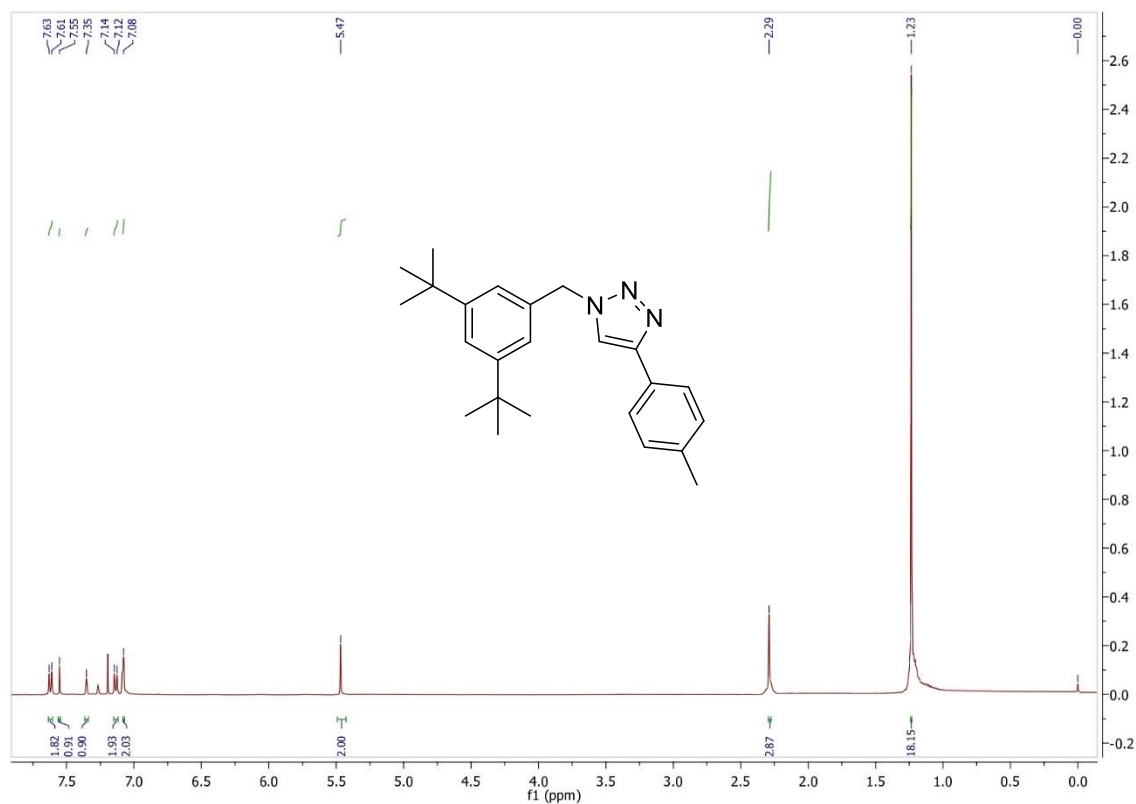

$^{13}\text{C}$ -NMR spectrum of 1-(3,5-di-tert-butylbenzyl)-4-(p-tolyl)-1H-1,2,3-triazole (3t)

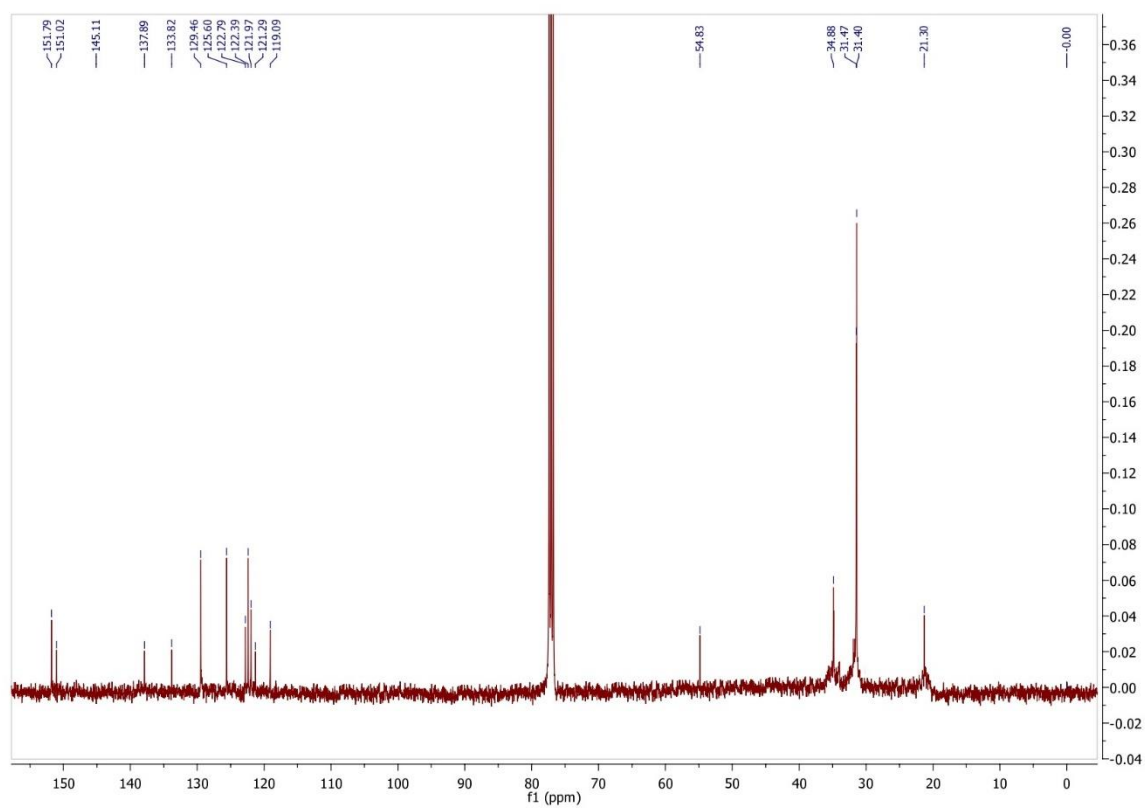

$^1\text{H}$ -NMR spectrum of 1-(4-(tert-butyl)benzyl)-4-phenyl-1H-1,2,3-triazole (3u)

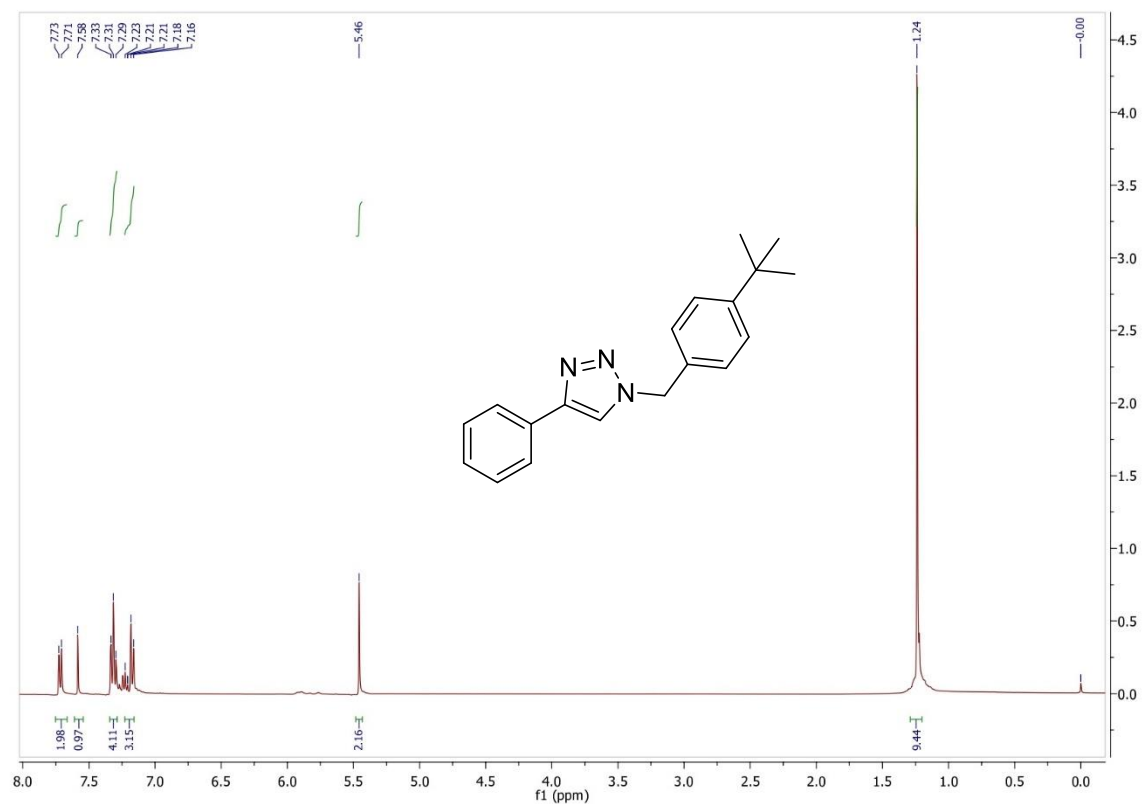

$^{13}\text{C}$ -NMR spectrum of 1-(4-(tert-butyl)benzyl)-4-phenyl-1H-1,2,3-triazole (3u)

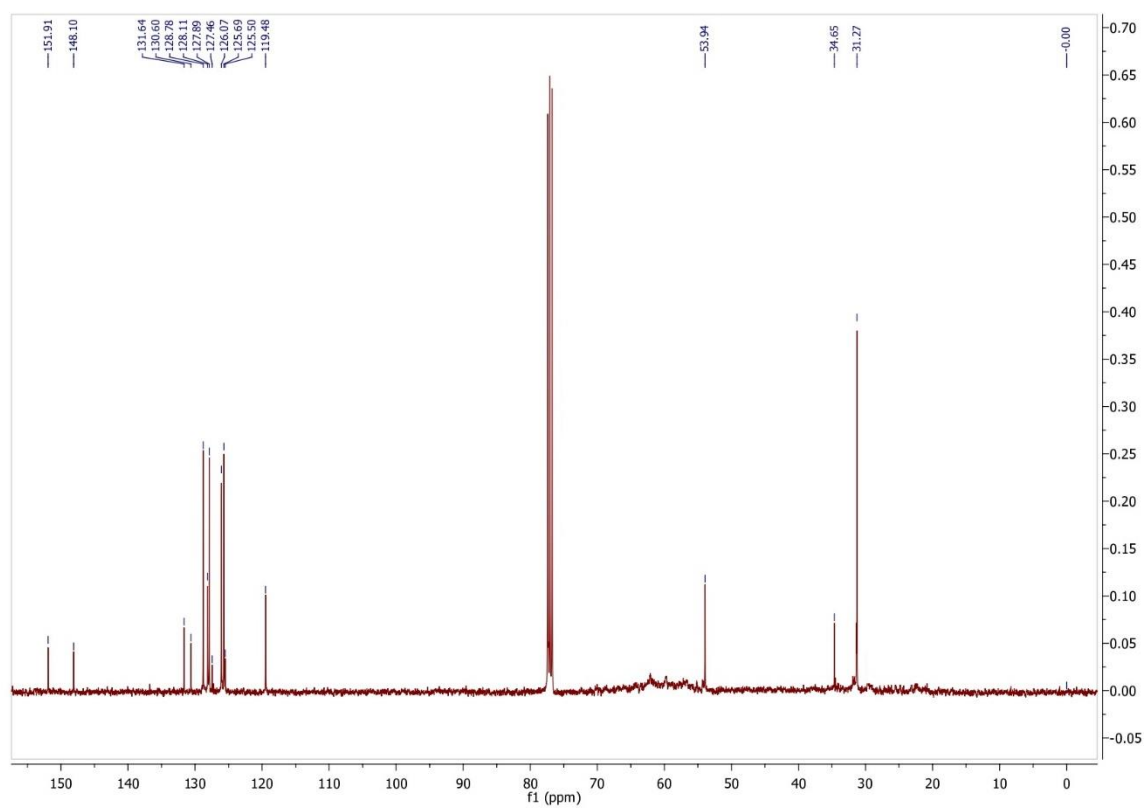

$^1\text{H}$ -NMR spectrum of 1-(4-(tert-butyl)benzyl)-4-(4-fluorophenyl)-1H-1,2,3-triazole (3v)

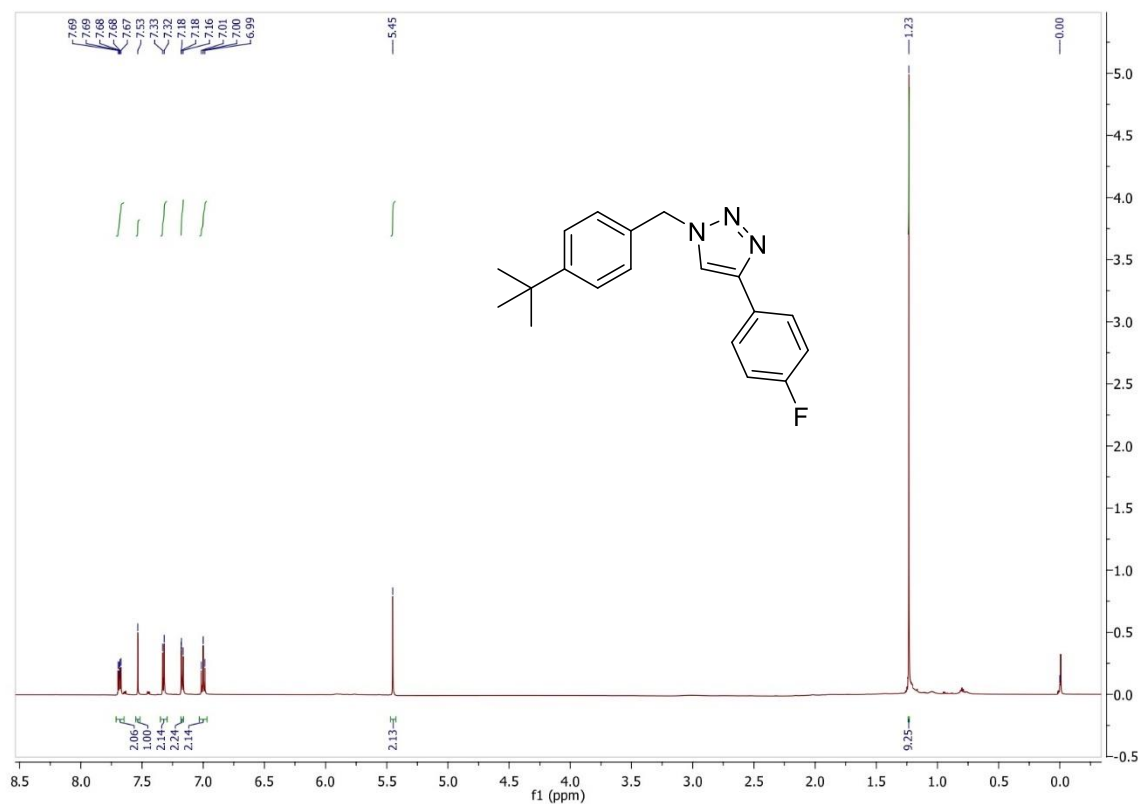

$^{13}\text{C}$ -NMR spectrum of 1-(4-(tert-butyl)benzyl)-4-(4-fluorophenyl)-1H-1,2,3-triazole (3v)

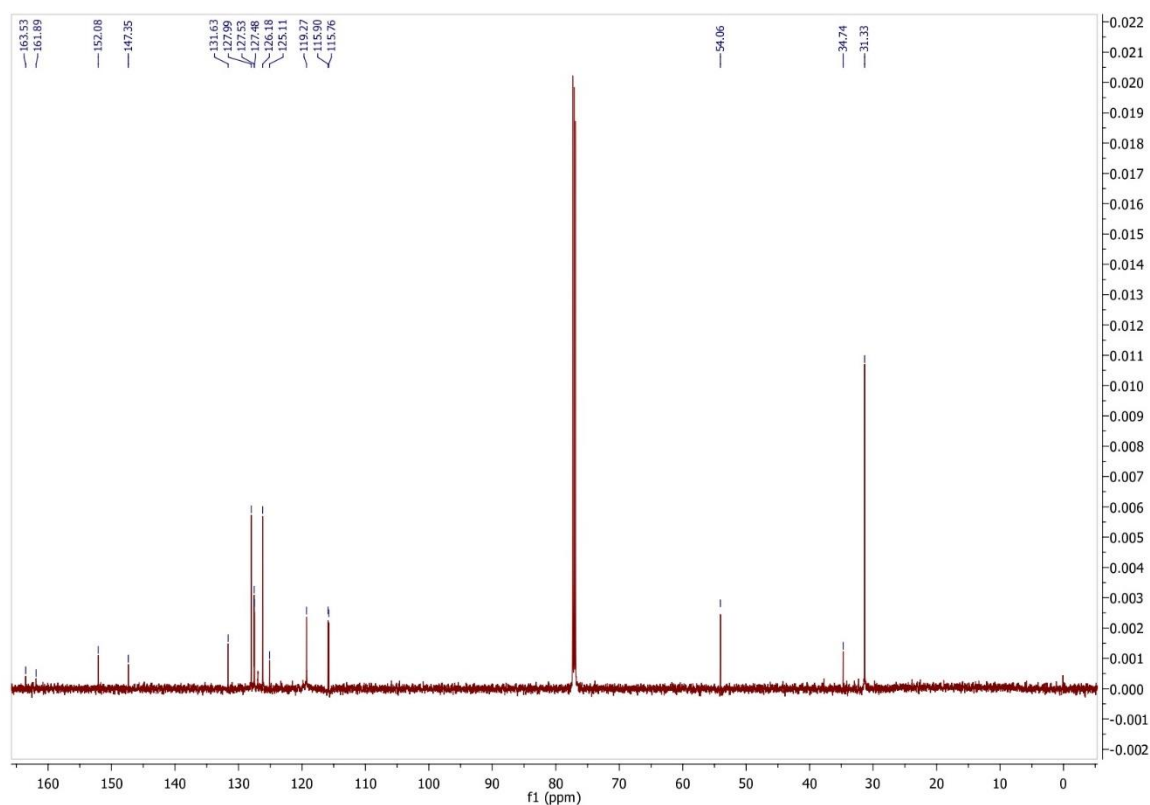

$^1\text{H}$ -NMR spectrum of 1-(4-chlorophenyl)-4-phenyl-1H-1,2,3-triazole (3w)

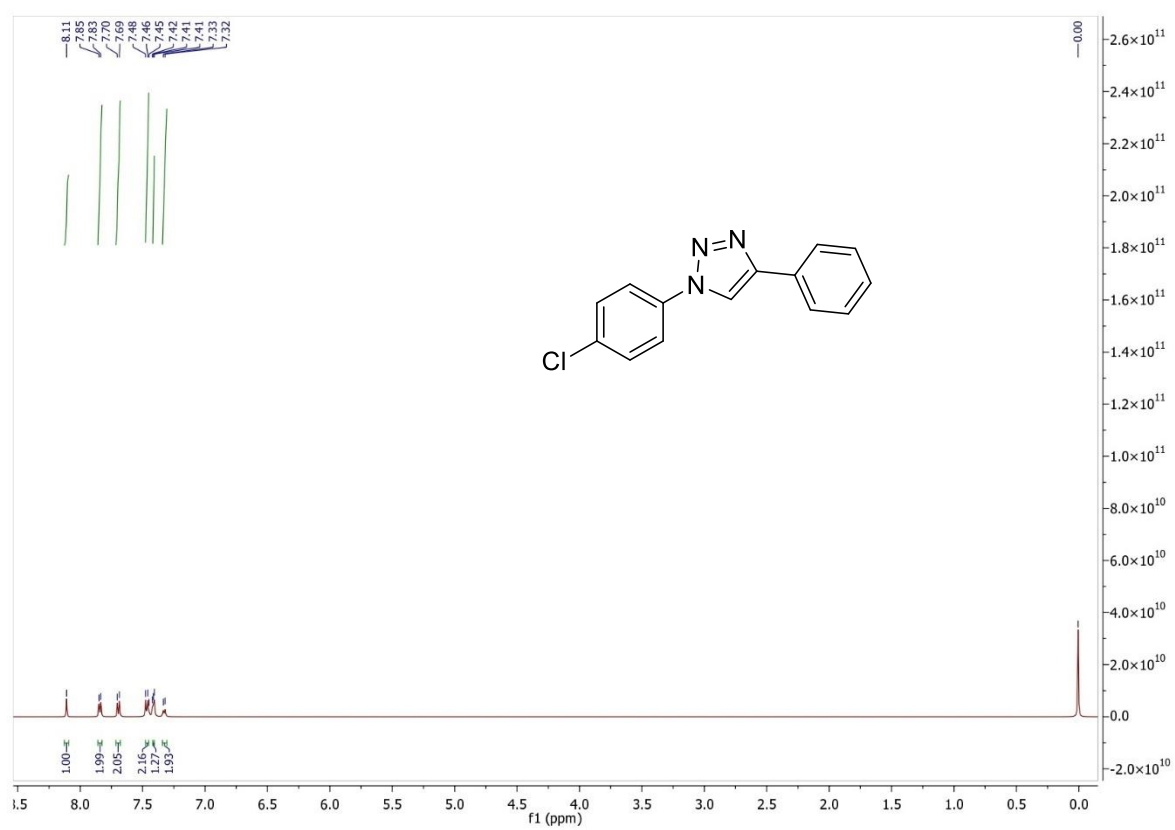

$^1\text{H}$ -NMR spectrum of 1-(4-(difluoromethoxy)phenyl)-4-phenyl-1H-1,2,3-triazole (3x)

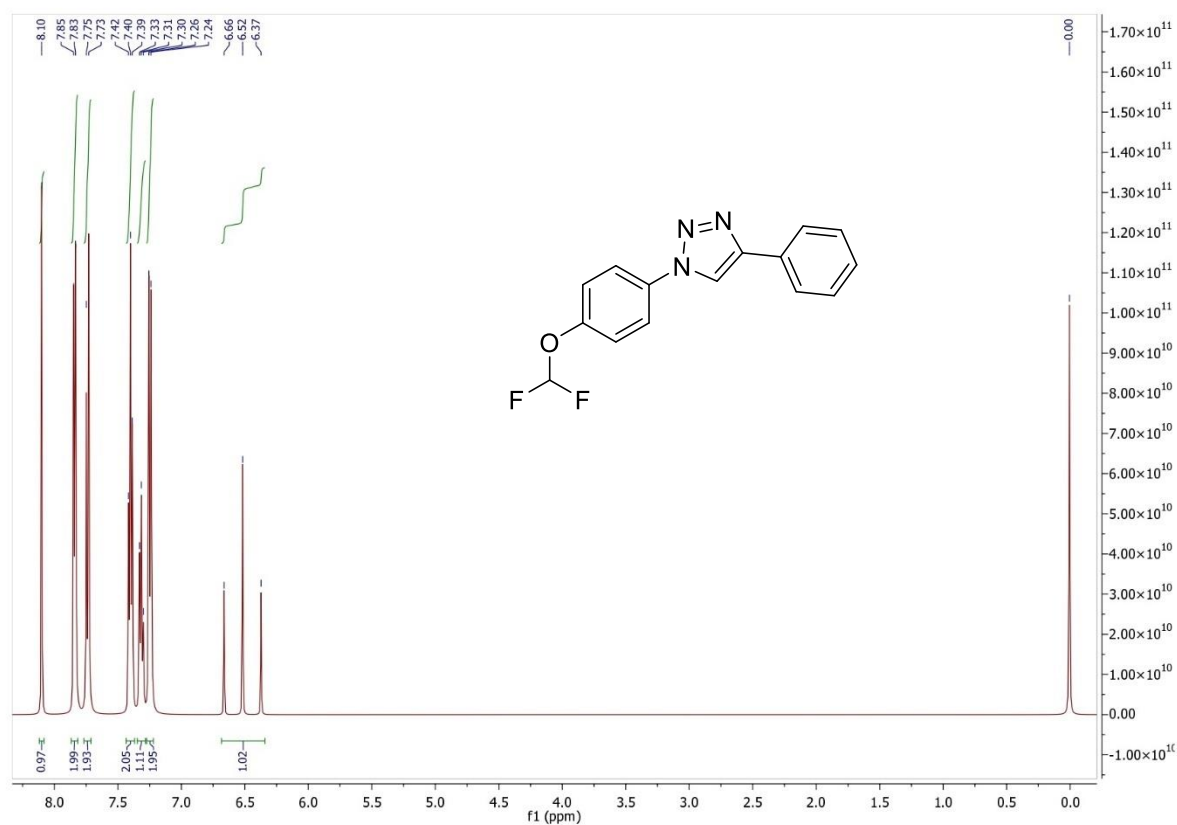

$^{13}\text{C}$ -NMR spectrum of 1-(4-(difluoromethoxy)phenyl)-4-phenyl-1H-1,2,3-triazole (3x)

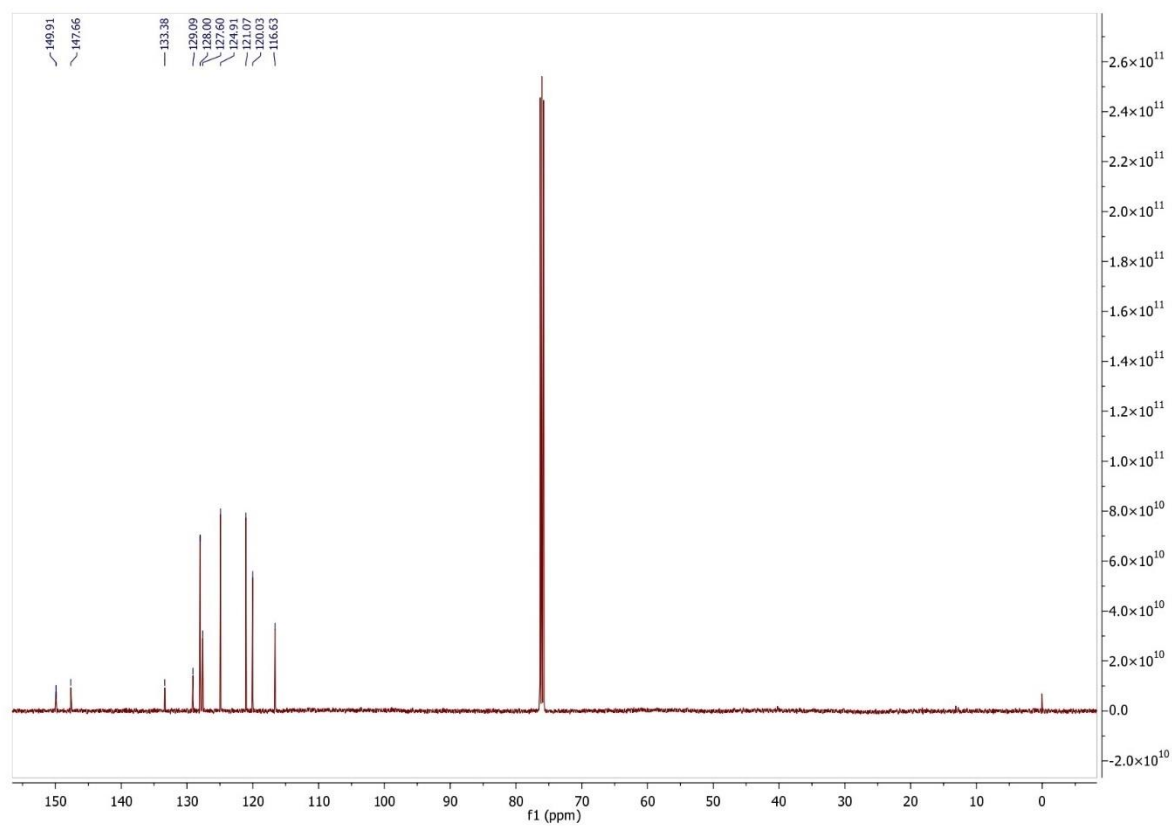

$^1\text{H}$ -NMR spectrum of 1-benzyl-4,5-diphenyl-1H-1,2,3-triazole (3y)

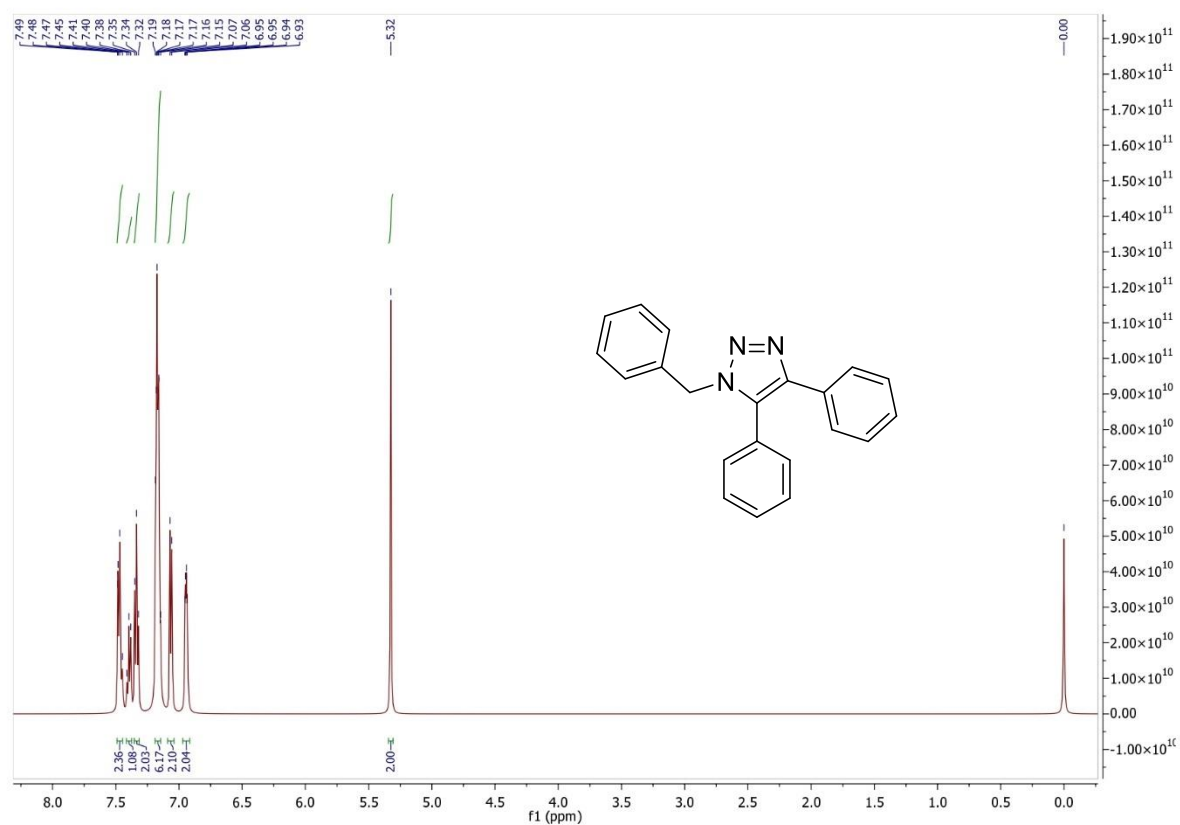

$^{13}\text{C}$ -NMR spectrum of 1-benzyl-4,5-diphenyl-1H-1,2,3-triazole (3y)

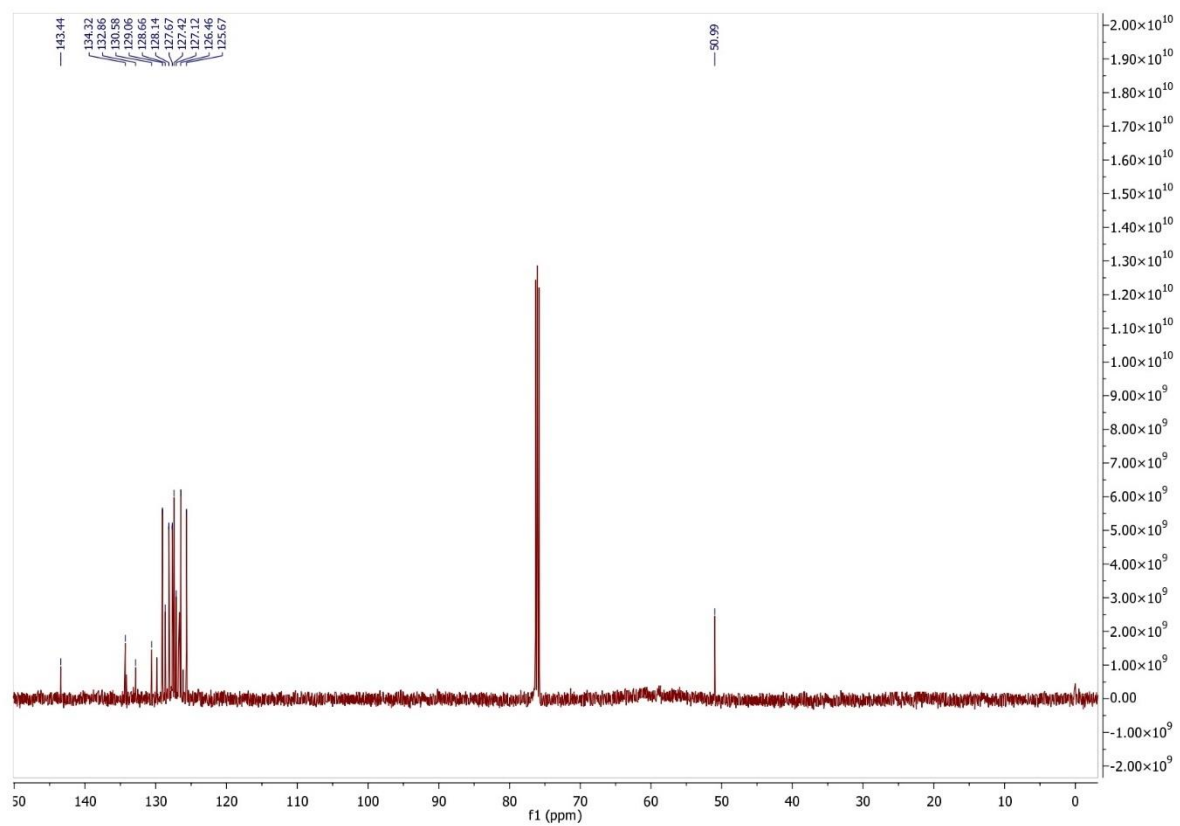

$^1\text{H}$ -NMR spectrum of dimethyl 1-phenyl-1H-1,2,3-triazole-4,5-dicarboxylate (3z)

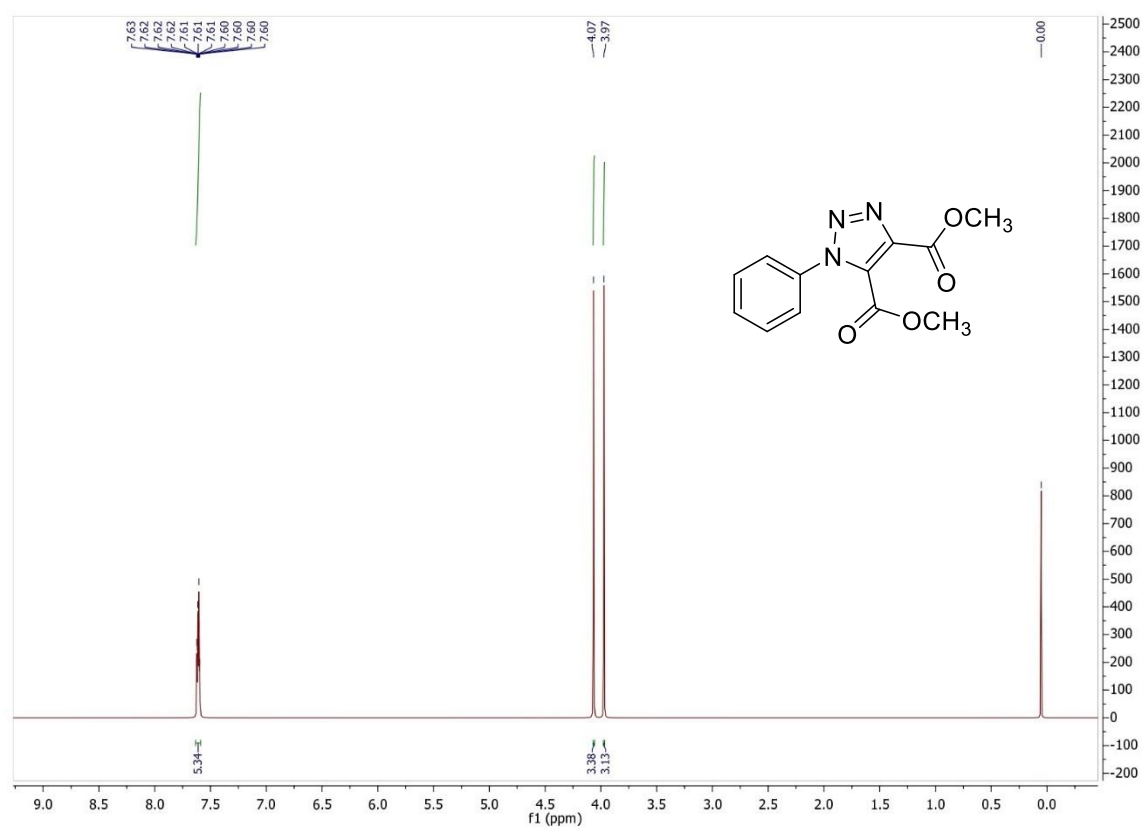

$^{13}\text{C}$ -NMR spectrum of dimethyl 1-phenyl-1H-1,2,3-triazole-4,5-dicarboxylate (3z)

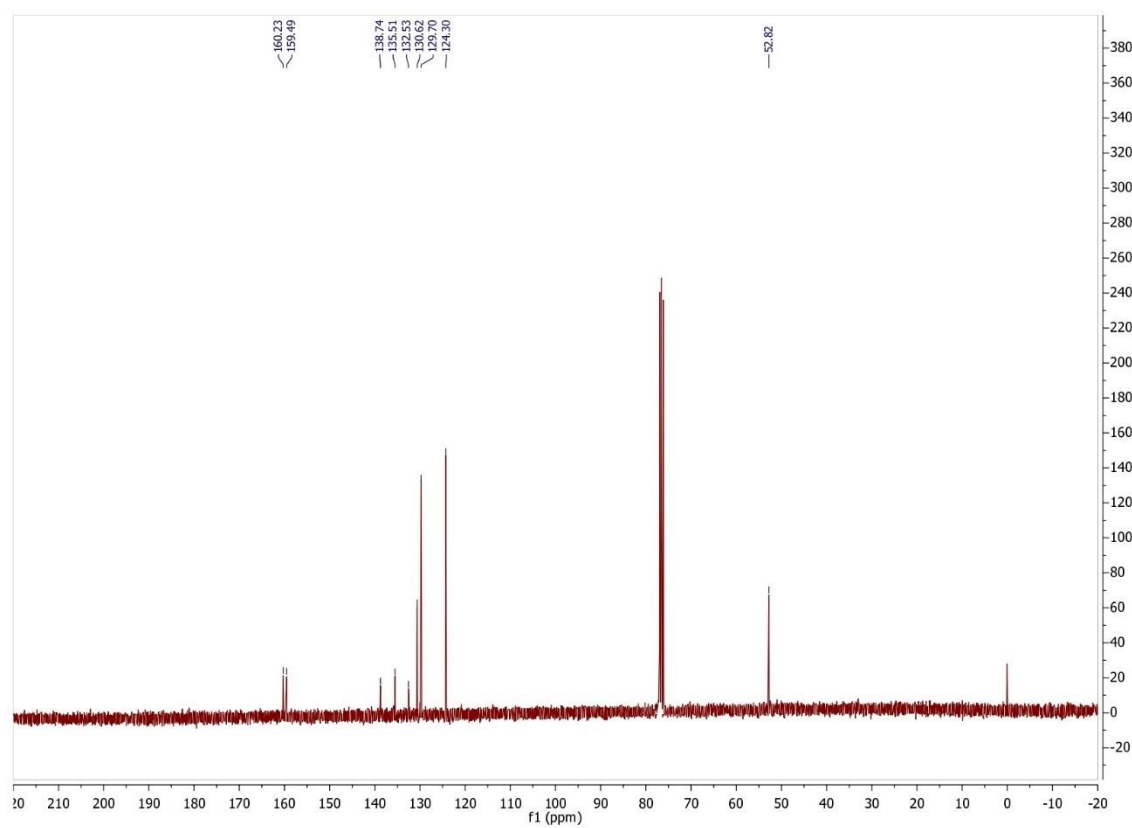

$^1\text{H}$ -NMR spectrum of  $\text{Ag}[(\text{PCy}_3)_2]\text{NO}_3$

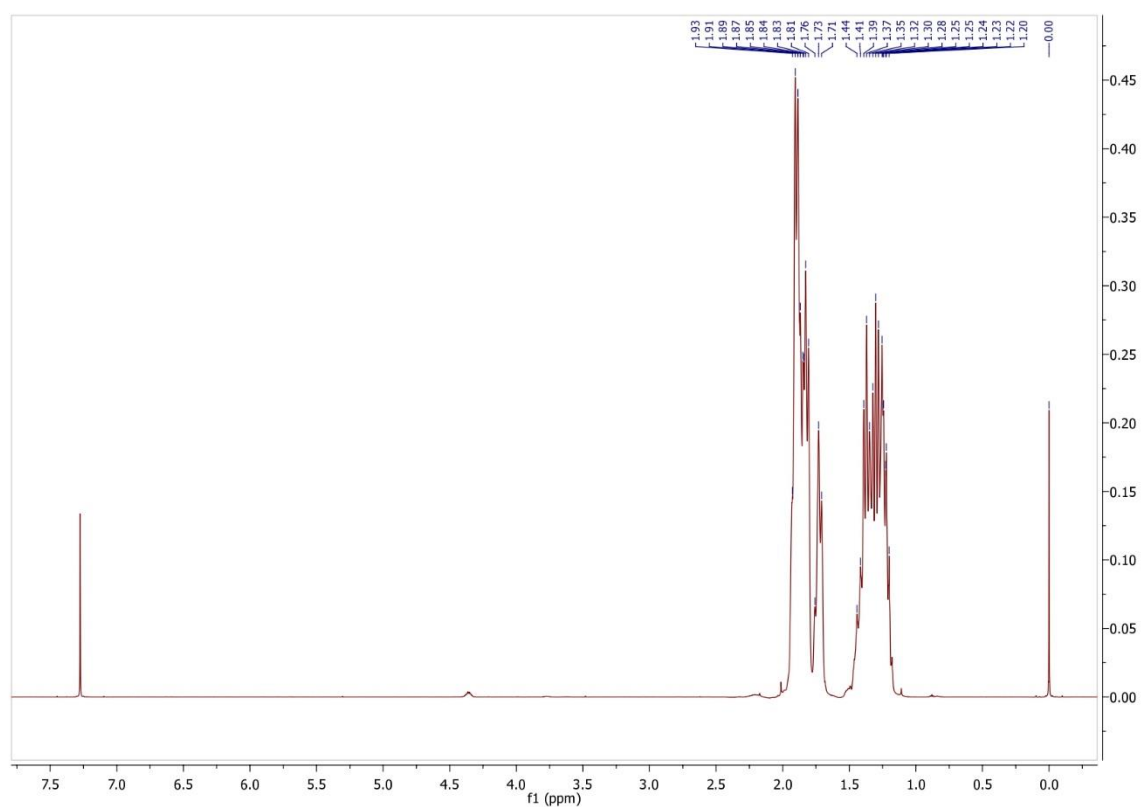

$^{13}\text{C}$ -NMR spectrum of  $\text{Ag}[(\text{PCy}_3)_2]\text{NO}_3$

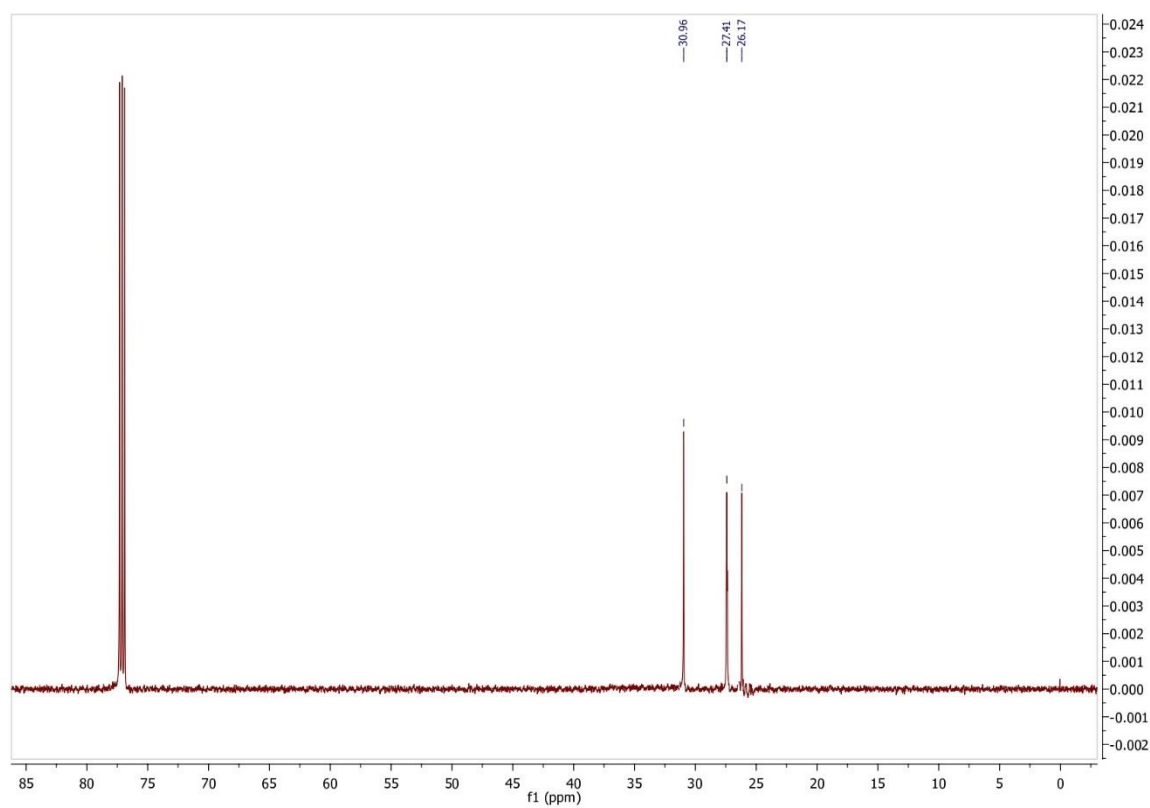



## checkCIF/PLATON report

Structure factors have been supplied for datablock(s) BS\_RN\_Ag\_1\_0m\_a

THIS REPORT IS FOR GUIDANCE ONLY. IF USED AS PART OF A REVIEW PROCEDURE FOR PUBLICATION, IT SHOULD NOT REPLACE THE EXPERTISE OF AN EXPERIENCED CRYSTALLOGRAPHIC REFEREE.

No syntax errors found.      CIF dictionary      Interpreting this report

### Datablock: BS\_RN\_Ag\_1\_0m\_a

---

Bond precision:      C-C = 0.0086 Å      Wavelength=0.71073

Cell:                      a=9.262 (2)                      b=9.837 (2)                      c=23.332 (5)  
                              alpha=94.658 (6)                      beta=96.469 (6)                      gamma=116.368 (6)

Temperature:      100 K

|                        | Calculated         | Reported           |
|------------------------|--------------------|--------------------|
| Volume                 | 1871.8 (7)         | 1871.8 (7)         |
| Space group            | P -1               | P -1               |
| Hall group             | -P 1               | -P 1               |
| Moiety formula         | C36 H55 Ag N O3 P2 | ?                  |
| Sum formula            | C36 H55 Ag N O3 P2 | C36 H55 Ag N O3 P2 |
| Mr                     | 719.62             | 719.62             |
| Dx, g cm <sup>-3</sup> | 1.277              | 1.277              |
| Z                      | 2                  | 2                  |
| Mu (mm <sup>-1</sup> ) | 0.657              | 0.657              |
| F000                   | 758.0              | 758.0              |
| F000'                  | 756.85             |                    |
| h, k, lmax             | 11, 12, 28         | 11, 12, 28         |
| Nref                   | 7364               | 7362               |
| Tmin, Tmax             | 0.821, 0.871       | 0.820, 0.870       |
| Tmin'                  | 0.800              |                    |

Correction method= # Reported T Limits: Tmin=0.820 Tmax=0.870  
AbsCorr = MULTI-SCAN

Data completeness= 1.000

Theta(max)= 25.998

R(reflections)= 0.0511 ( 5751)

wR2(reflections)=  
0.1406 ( 7362)

S = 1.067

Npar= 406

---

The following ALERTS were generated. Each ALERT has the format

**test-name\_ALERT\_alert-type\_alert-level.**

Click on the hyperlinks for more details of the test.

---

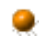

#### Alert level B

|                   |              |                                     |                                 |     |       |
|-------------------|--------------|-------------------------------------|---------------------------------|-----|-------|
| PLAT241_ALERT_2_B | High         | 'MainMol'                           | Ueq as Compared to Neighbors of | O2  | Check |
| PLAT241_ALERT_2_B | High         | 'MainMol'                           | Ueq as Compared to Neighbors of | C28 | Check |
| PLAT242_ALERT_2_B | Low          | 'MainMol'                           | Ueq as Compared to Neighbors of | N1  | Check |
| PLAT919_ALERT_3_B | Reflection # | Likely Affected by the Beamstop ... |                                 | 1   | Check |

---

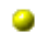

#### Alert level C

|                   |                                                |                       |                                 |         |        |
|-------------------|------------------------------------------------|-----------------------|---------------------------------|---------|--------|
| PLAT213_ALERT_2_C | Atom O3                                        | has ADP max/min Ratio | .....                           | 3.2     | prolat |
| PLAT220_ALERT_2_C | NonSolvent                                     | Resd 1 C              | Ueq(max)/Ueq(min) Range         | 3.5     | Ratio  |
| PLAT234_ALERT_4_C | Large Hirshfeld Difference                     | O2                    | --N1                            | 0.16    | Ang.   |
| PLAT234_ALERT_4_C | Large Hirshfeld Difference                     | C25                   | --C26A                          | 0.18    | Ang.   |
| PLAT234_ALERT_4_C | Large Hirshfeld Difference                     | C28                   | --C29A                          | 0.18    | Ang.   |
| PLAT241_ALERT_2_C | High                                           | 'MainMol'             | Ueq as Compared to Neighbors of | O1      | Check  |
| PLAT241_ALERT_2_C | High                                           | 'MainMol'             | Ueq as Compared to Neighbors of | C16     | Check  |
| PLAT242_ALERT_2_C | Low                                            | 'MainMol'             | Ueq as Compared to Neighbors of | Ag1     | Check  |
| PLAT242_ALERT_2_C | Low                                            | 'MainMol'             | Ueq as Compared to Neighbors of | C14     | Check  |
| PLAT329_ALERT_4_C | Carbon Atom Hybridisation Unclear for          | .....                 |                                 | C26A    | Check  |
| PLAT329_ALERT_4_C | Carbon Atom Hybridisation Unclear for          | .....                 |                                 | C26B    | Check  |
| PLAT329_ALERT_4_C | Carbon Atom Hybridisation Unclear for          | .....                 |                                 | C29A    | Check  |
| PLAT329_ALERT_4_C | Carbon Atom Hybridisation Unclear for          | .....                 |                                 | C29B    | Check  |
| PLAT342_ALERT_3_C | Low Bond Precision on                          | C-C Bonds             | .....                           | 0.00862 | Ang.   |
| PLAT906_ALERT_3_C | Large K Value in the Analysis of Variance      | .....                 |                                 | 2.056   | Check  |
| PLAT911_ALERT_3_C | Missing FCF Refl Between Thmin & STh/L=        | 0.600                 |                                 | 2       | Report |
| PLAT918_ALERT_3_C | Reflection(s) with I(obs) much Smaller I(calc) | .                     |                                 | 1       | Check  |
| PLAT934_ALERT_3_C | Number of (Iobs-Icalc)/Sigma(W) > 10 Outliers  | ..                    |                                 | 1       | Check  |
| PLAT975_ALERT_2_C | Check Calcd Resid. Dens.                       | 0.90Ang From C30      | .                               | 0.42    | eA-3   |
| PLAT975_ALERT_2_C | Check Calcd Resid. Dens.                       | 0.93Ang From C30      | .                               | 0.41    | eA-3   |

---

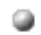

#### Alert level G

|                   |                                                  |                |             |       |             |
|-------------------|--------------------------------------------------|----------------|-------------|-------|-------------|
| PLAT066_ALERT_1_G | Predicted and Reported Tmin&Tmax Range Identical |                |             | ?     | Check       |
| PLAT154_ALERT_1_G | The s.u.'s on the Cell Angles are Equal ..(Note) |                |             | 0.006 | Degree      |
| PLAT232_ALERT_2_G | Hirshfeld Test Diff (M-X)                        | Ag1            | --P2        | 5.2   | s.u.        |
| PLAT232_ALERT_2_G | Hirshfeld Test Diff (M-X)                        | Ag1            | --O1        | 5.7   | s.u.        |
| PLAT300_ALERT_4_G | Atom Site Occupancy of C26A                      | Constrained at |             | 0.5   | Check       |
| PLAT300_ALERT_4_G | Atom Site Occupancy of C26B                      | Constrained at |             | 0.5   | Check       |
| PLAT300_ALERT_4_G | Atom Site Occupancy of C29A                      | Constrained at |             | 0.5   | Check       |
| PLAT300_ALERT_4_G | Atom Site Occupancy of C29B                      | Constrained at |             | 0.5   | Check       |
| PLAT301_ALERT_3_G | Main Residue Disorder                            | .....(Resd 1 ) |             | 5%    | Note        |
| PLAT367_ALERT_2_G | Long? C(sp?)-C(sp?) Bond                         | C25            | - C30       | 1.51  | Ang.        |
| PLAT367_ALERT_2_G | Long? C(sp?)-C(sp?) Bond                         | C27            | - C28       | 1.51  | Ang.        |
| PLAT779_ALERT_4_G | Suspect or Irrelevant (Bond) Angle(s) in CIF ... |                |             | 28.70 | Deg.        |
|                   | C29A -C30 -C29B                                  | 1_555          | 1_555 1_555 | ..... | # 64 Check  |
| PLAT779_ALERT_4_G | Suspect or Irrelevant (Bond) Angle(s) in CIF ... |                |             | 42.50 | Deg.        |
|                   | C26B -C25 -C26A                                  | 1_555          | 1_555 1_555 | ..... | # 71 Check  |
| PLAT779_ALERT_4_G | Suspect or Irrelevant (Bond) Angle(s) in CIF ... |                |             | 37.00 | Deg.        |
|                   | C26B -C27 -C26A                                  | 1_555          | 1_555 1_555 | ..... | # 205 Check |
| PLAT779_ALERT_4_G | Suspect or Irrelevant (Bond) Angle(s) in CIF ... |                |             | 32.50 | Deg.        |
|                   | C29B -C28 -C29A                                  | 1_555          | 1_555 1_555 | ..... | # 215 Check |

|                                                                    |              |
|--------------------------------------------------------------------|--------------|
| PLAT883_ALERT_1_G No Info/Value for _atom_sites_solution_primary . | Please Do !  |
| PLAT965_ALERT_2_G The SHELXL WEIGHT Optimisation has not Converged | Please Check |
| PLAT967_ALERT_5_G Note: Two-Theta Cutoff Value in Embedded .res .. | 52.0 Degree  |
| PLAT978_ALERT_2_G Number C-C Bonds with Positive Residual Density. | 1 Info       |

---

0 **ALERT level A** = Most likely a serious problem - resolve or explain  
4 **ALERT level B** = A potentially serious problem, consider carefully  
20 **ALERT level C** = Check. Ensure it is not caused by an omission or oversight  
19 **ALERT level G** = General information/check it is not something unexpected

3 ALERT type 1 CIF construction/syntax error, inconsistent or missing data  
17 ALERT type 2 Indicator that the structure model may be wrong or deficient  
7 ALERT type 3 Indicator that the structure quality may be low  
15 ALERT type 4 Improvement, methodology, query or suggestion  
1 ALERT type 5 Informative message, check

---

It is advisable to attempt to resolve as many as possible of the alerts in all categories. Often the minor alerts point to easily fixed oversights, errors and omissions in your CIF or refinement strategy, so attention to these fine details can be worthwhile. In order to resolve some of the more serious problems it may be necessary to carry out additional measurements or structure refinements. However, the purpose of your study may justify the reported deviations and the more serious of these should normally be commented upon in the discussion or experimental section of a paper or in the "special\_details" fields of the CIF. checkCIF was carefully designed to identify outliers and unusual parameters, but every test has its limitations and alerts that are not important in a particular case may appear. Conversely, the absence of alerts does not guarantee there are no aspects of the results needing attention. It is up to the individual to critically assess their own results and, if necessary, seek expert advice.

### Publication of your CIF in IUCr journals

A basic structural check has been run on your CIF. These basic checks will be run on all CIFs submitted for publication in IUCr journals (*Acta Crystallographica*, *Journal of Applied Crystallography*, *Journal of Synchrotron Radiation*); however, if you intend to submit to *Acta Crystallographica Section C* or *E* or *IUCrData*, you should make sure that full publication checks are run on the final version of your CIF prior to submission.

### Publication of your CIF in other journals

Please refer to the *Notes for Authors* of the relevant journal for any special instructions relating to CIF submission.

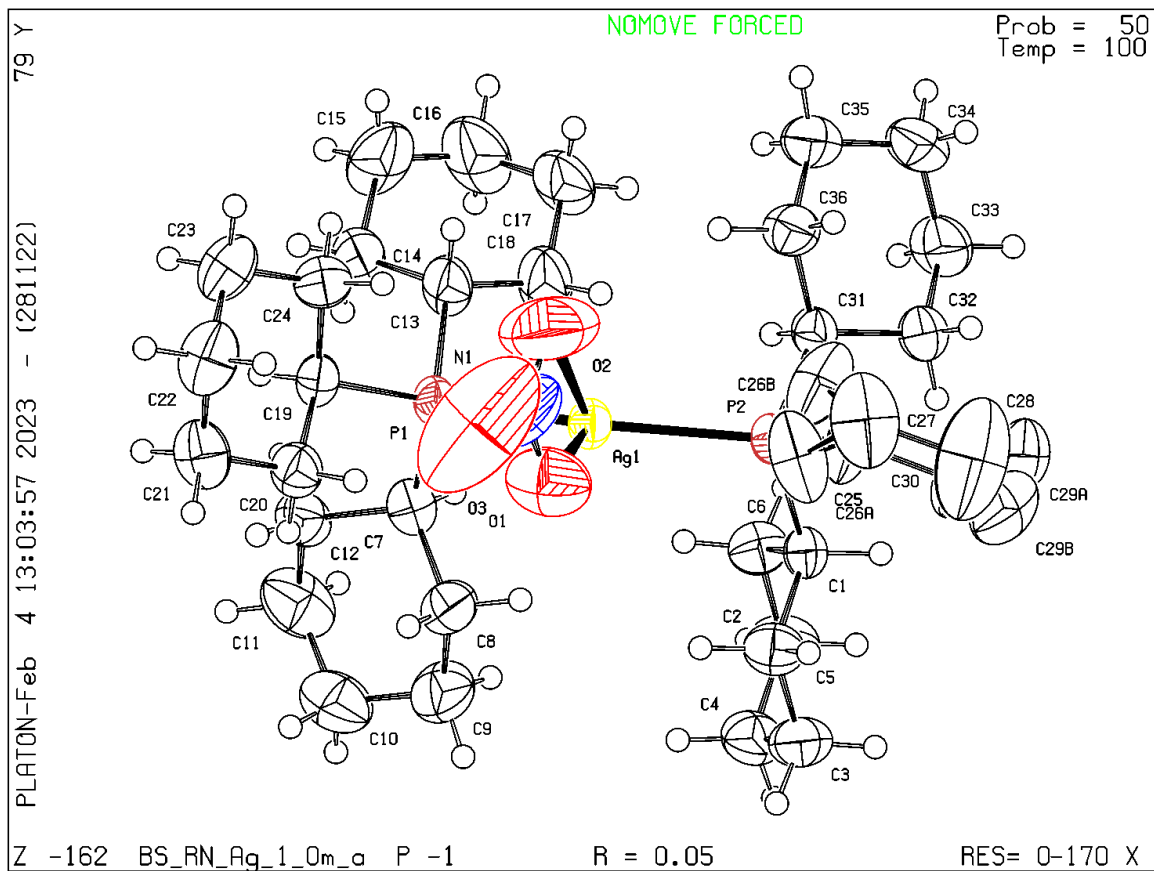

```
R(reflections)= 0.0458( 2082)      wR2(reflections)=
S = 1.003                        0.1100( 3165)
Npar= 281
```

---

The following ALERTS were generated. Each ALERT has the format

**test-name\_ALERT\_alert-type\_alert-level.**

Click on the hyperlinks for more details of the test.

---



#### Alert level B

PLAT213\_ALERT\_2\_B Atom F5B has ADP max/min Ratio ..... 4.2 prolat

---

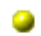

#### Alert level C

PLAT213\_ALERT\_2\_C Atom F9 has ADP max/min Ratio ..... 3.2 prolat  
PLAT234\_ALERT\_4\_C Large Hirshfeld Difference F8 --C8 . 0.16 Ang.  
PLAT234\_ALERT\_4\_C Large Hirshfeld Difference F5B --C7 . 0.22 Ang.  
PLAT241\_ALERT\_2\_C High 'MainMol' Ueq as Compared to Neighbors of C18 Check  
PLAT242\_ALERT\_2\_C Low 'MainMol' Ueq as Compared to Neighbors of C12 Check  
PLAT260\_ALERT\_2\_C Large Average Ueq of Residue Including F1 0.110 Check  
PLAT331\_ALERT\_2\_C Small Aver Phenyl C-C Dist C12 --C17 . 1.37 Ang.  
PLAT906\_ALERT\_3\_C Large K Value in the Analysis of Variance ..... 3.428 Check  
PLAT911\_ALERT\_3\_C Missing FCF Refl Between Thmin & STh/L= 0.600 52 Report

---

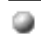

#### Alert level G

PLAT019\_ALERT\_1\_G \_diffn\_measured\_fraction\_theta\_full/\*\_max < 1.0 0.998 Report  
PLAT066\_ALERT\_1\_G Predicted and Reported Tmin&Tmax Range Identical ? Check  
PLAT230\_ALERT\_2\_G Hirshfeld Test Diff for F1 --C7 . 6.0 s.u.  
PLAT230\_ALERT\_2\_G Hirshfeld Test Diff for F6 --F7 . 10.8 s.u.  
PLAT230\_ALERT\_2\_G Hirshfeld Test Diff for F6 --F10 . 7.7 s.u.  
PLAT230\_ALERT\_2\_G Hirshfeld Test Diff for F7 --F8 . 25.0 s.u.  
PLAT230\_ALERT\_2\_G Hirshfeld Test Diff for F8 --F9 . 8.2 s.u.  
PLAT230\_ALERT\_2\_G Hirshfeld Test Diff for F9 --F10 . 40.9 s.u.  
PLAT242\_ALERT\_2\_G Low 'MainMol' Ueq as Compared to Neighbors of C7 Check  
PLAT242\_ALERT\_2\_G Low 'MainMol' Ueq as Compared to Neighbors of C8 Check  
PLAT300\_ALERT\_4\_G Atom Site Occupancy of F1 Constrained at 0.73 Check  
PLAT300\_ALERT\_4\_G Atom Site Occupancy of F2 Constrained at 0.75 Check  
PLAT300\_ALERT\_4\_G Atom Site Occupancy of F3 Constrained at 0.6 Check  
PLAT300\_ALERT\_4\_G Atom Site Occupancy of F6 Constrained at 0.6 Check  
PLAT300\_ALERT\_4\_G Atom Site Occupancy of F7 Constrained at 0.6 Check  
PLAT300\_ALERT\_4\_G Atom Site Occupancy of F8 Constrained at 0.6 Check  
PLAT300\_ALERT\_4\_G Atom Site Occupancy of F9 Constrained at 0.6 Check  
PLAT300\_ALERT\_4\_G Atom Site Occupancy of F10 Constrained at 0.6 Check  
PLAT300\_ALERT\_4\_G Atom Site Occupancy of F4 Constrained at 0.4 Check  
PLAT300\_ALERT\_4\_G Atom Site Occupancy of F5 Constrained at 0.27 Check  
PLAT300\_ALERT\_4\_G Atom Site Occupancy of F5B Constrained at 0.25 Check  
PLAT301\_ALERT\_3\_G Main Residue Disorder .....(Resd 1 ) 23% Note  
PLAT764\_ALERT\_4\_G Overcomplete CIF Bond List Detected (Rep/Expd) . 1.16 Ratio  
PLAT779\_ALERT\_4\_G Suspect or Irrelevant (Bond) Angle(s) in CIF ... 37.00 Deg.  
F1 -C7 -F5 1\_555 1\_555 1\_555 ..... # 40 Check  
PLAT883\_ALERT\_1\_G No Info/Value for \_atom\_sites\_solution\_primary . Please Do !  
PLAT913\_ALERT\_3\_G Missing # of Very Strong Reflections in FCF .... 1 Note  
PLAT933\_ALERT\_2\_G Number of HKL-OMIT Records in Embedded .res File 50 Note  
PLAT965\_ALERT\_2\_G The SHELXL WEIGHT Optimisation has not Converged Please Check  
PLAT967\_ALERT\_5\_G Note: Two-Theta Cutoff Value in Embedded .res .. 52.0 Degree  
PLAT978\_ALERT\_2\_G Number C-C Bonds with Positive Residual Density. 0 Info

---

0 **ALERT level A** = Most likely a serious problem - resolve or explain  
1 **ALERT level B** = A potentially serious problem, consider carefully  
9 **ALERT level C** = Check. Ensure it is not caused by an omission or oversight  
30 **ALERT level G** = General information/check it is not something unexpected

3 ALERT type 1 CIF construction/syntax error, inconsistent or missing data  
17 ALERT type 2 Indicator that the structure model may be wrong or deficient  
4 ALERT type 3 Indicator that the structure quality may be low  
15 ALERT type 4 Improvement, methodology, query or suggestion  
1 ALERT type 5 Informative message, check

---

It is advisable to attempt to resolve as many as possible of the alerts in all categories. Often the minor alerts point to easily fixed oversights, errors and omissions in your CIF or refinement strategy, so attention to these fine details can be worthwhile. In order to resolve some of the more serious problems it may be necessary to carry out additional measurements or structure refinements. However, the purpose of your study may justify the reported deviations and the more serious of these should normally be commented upon in the discussion or experimental section of a paper or in the "special\_details" fields of the CIF. checkCIF was carefully designed to identify outliers and unusual parameters, but every test has its limitations and alerts that are not important in a particular case may appear. Conversely, the absence of alerts does not guarantee there are no aspects of the results needing attention. It is up to the individual to critically assess their own results and, if necessary, seek expert advice.

### **Publication of your CIF in IUCr journals**

A basic structural check has been run on your CIF. These basic checks will be run on all CIFs submitted for publication in IUCr journals (*Acta Crystallographica*, *Journal of Applied Crystallography*, *Journal of Synchrotron Radiation*); however, if you intend to submit to *Acta Crystallographica Section C* or *E* or *IUCrData*, you should make sure that **full publication checks** are run on the final version of your CIF prior to submission.

### **Publication of your CIF in other journals**

Please refer to the *Notes for Authors* of the relevant journal for any special instructions relating to CIF submission.

---

**PLATON version of 28/11/2022; check.def file version of 28/11/2022**

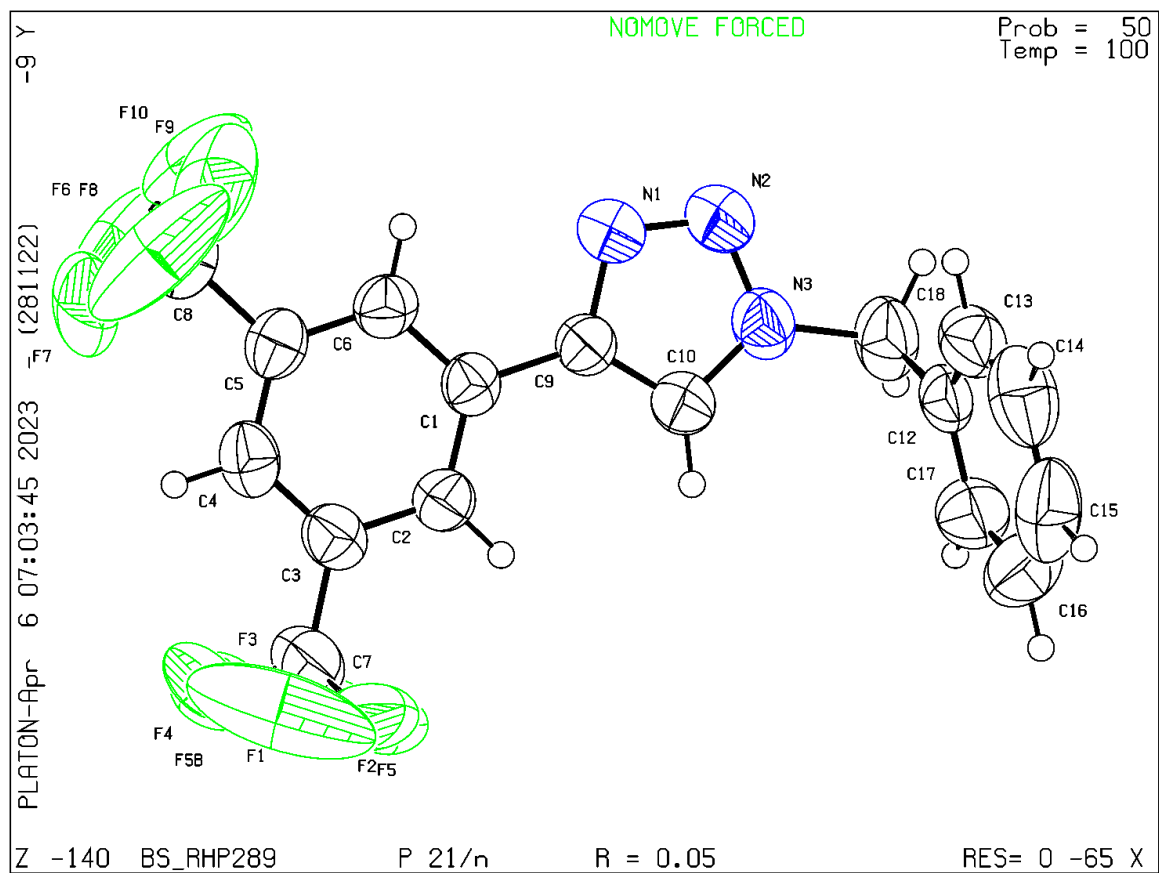

Supplement: d3ob01738a1.pdf [file d3ob01738a1.pdf]
